# Supplementary material for: Organocatalytic direct asymmetric vinylogous Mannich reaction of γ-butenolides with isatin-derived ketimines
Source: Royal Society of Chemistry journal article supplement (doi:10.1039/c4ra04824e), 2014-01-01
Supplement: c4ra04824e1.pdf [file c4ra04824e1.pdf]

## Supporting Information

Organocatalytic Direct Asymmetric Vinylogous Mannich Reaction of  $\gamma$ -Butenolides with  
Isatins-derived Ketimine

Yunlong Guo,<sup>a,b</sup> Yong Zhang,<sup>a,b</sup> Liangwen Qi,<sup>a,b</sup> Fang Tian<sup>a</sup> and Lixin Wang<sup>\*,a</sup>

<sup>a</sup>Key Laboratory of Asymmetric Synthesis & Chirotechnology of Sichuan Province, Chengdu

Institute of Organic Chemistry, Chinese Academy of Sciences, Chengdu 610041, PR China;

<sup>b</sup>University of Chinese Academy of Sciences, Beijing 100039, PR China

wlxio@cioc.ac.cn

### Table of Contents

|                                                                              |                |
|------------------------------------------------------------------------------|----------------|
| <b>General methods</b> .....                                                 | <b>S2</b>      |
| <b>Materials</b> .....                                                       | <b>S2</b>      |
| <b>Procedure for the Direct Asymmetric Vinylogous Mannich Reaction</b> ..... | <b>S2</b>      |
| <b>X-Ray Crystal Data for Compound 3aa</b> .....                             | <b>S17-S24</b> |
| <b>NMR Spectra of Products</b> .....                                         | <b>S25-S49</b> |
| <b>HPLC Analysis of Products</b> .....                                       | <b>S50-S74</b> |
| <b>References</b> .....                                                      | <b>S75</b>     |

## General methods

Commercial grade solvent was dried and purified by standard procedures as specified in Purification of Laboratory Chemicals, 4th Ed (Armarego, W. L. F.; Perrin, D. D. Butterworth Heinemann: 1997). NMR spectra were recorded with tetramethylsilane as internal standard.  $^1\text{H}$  NMR spectra were recorded at 300 MHz, and  $^{13}\text{C}$  NMR spectra were recorded at 75 MHz (Bruker Avance). Chemical shifts ( $\delta$ ) were reported in ppm downfield from  $\text{CDCl}_3$  ( $\delta = 7.26$  ppm) for  $^1\text{H}$  NMR and relative to the central  $\text{CDCl}_3$  resonance ( $\delta = 77.0$  ppm) for  $^{13}\text{C}$  NMR spectroscopies. Flash column chromatography was carried out using silica gel eluting with ethyl acetate and petroleum ether. High-resolution mass spectra were obtained with the microTOF-Q mass spectrometer (ESI). Reactions were monitored by TLC and visualized with ultraviolet light. Enantiomeric excess was determined by HPLC analysis on chiralpak AD-H and IC-H columns at 35 °C.

## Materials

All starting materials were obtained from commercial supplier without further purification. The substrates **1**<sup>1</sup> and **2**<sup>2</sup> were prepared according to literature methods. The catalysts **4** were purchased from commercial suppliers or prepared according to literature methods.<sup>3</sup>

## Procedure for the Direct Asymmetric Vinylogous Mannich Reaction

A mixture of ketimine **1** (0.1 mmol), butenolide **2** (0.2 mmol) and catalyst **4k** (5 mol %) in dry DCM (0.5 mL) was stirred at -30 °C. After the reaction was completed (monitored by TLC), the mixture was directly transferred to a silica gel column and purified by flash column chromatography (hexane/AcOEt = 10/1-4/1) to give **3**.

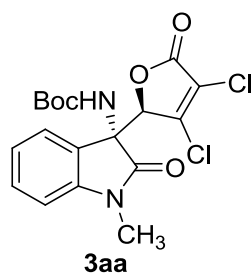

***tert*-butyl(*R*)-3-((*R*)-3,4-dichloro-5-oxo-2,5-dihydrofuran-2-yl)-1-methyl-2-oxoindolin-3-ylcar**

**bamate (3aa)**, white solid, yield 95 %, 77/23 dr, Enantiomeric excess: 90 %, determined by HPLC (Chiralcel AD-H column, hexane/*i*-propanol = 50/50, flow rate 0.6 mL/min, UV detection at 220 nm),  $t_R$  (minor) = 11.0 min,  $t_R$  (major) = 18.5 min.  $^1\text{H NMR}$  (300 MHz,  $\text{CDCl}_3$ )  $\delta$  7.37-7.32 (m, 2H), 7.06-7.02 (m, 1H), 6.87-6.83 (m, 1H), 5.47 (s, 1H), 5.52 (s, 1H), 3.32 (s, 3H), 1.30 (s, 9H);  $^{13}\text{C NMR}$  (75MHz,  $\text{CDCl}_3$ )  $\delta$  170.8, 163.5, 153.3, 147.5, 147.3, 143.5, 130.6, 128.8, 123.8, 123.5, 108.9, 82.8, 81.2, 63.5, 28.0, 26.5; **HRMS (ESI)** Calcd. for  $\text{C}_{18}\text{H}_{18}\text{Cl}_2\text{NaN}_2\text{O}_5$   $[\text{M}+\text{Na}]^+$ : 435.0490; Found: 435.0485.

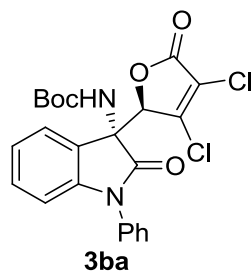

***tert*-butyl(*R*)-3-((*R*)-3,4-dichloro-5-oxo-2,5-dihydrofuran-2-yl)-2-oxo-1-phenylindolin-3-ylcar**

**bamate (3ba)**, white solid, yield 94 %, 79/21 dr, Enantiomeric excess: 91 %, determined by HPLC (Chiralcel IC-H column, hexane/*i*-propanol = 85/15, flow rate 1.0 mL/min, UV detection at 220 nm),  $t_R$  (minor) = 16.2 min,  $t_R$  (major) = 17.8 min.  $^1\text{H NMR}$  (300 MHz,  $\text{CDCl}_3$ )  $\delta$  7.56-7.28 (m, 7H), 7.10-7.05 (m, 1H), 6.87-6.80 (m, 1H), 5.81 (s, 1H), 5.60 (s, 1H), 1.35 (s, 9H);  $^{13}\text{C NMR}$  (75MHz,  $\text{CDCl}_3$ )  $\delta$  170.4, 163.6, 153.8, 147.7, 143.8, 133.9, 130.4, 129.7, 126.5, 126.1, 124.5, 124.0, 123.9, 123.4, 110.2, 83.0, 80.9, 63.5, 28.1; **HRMS (ESI)** Calcd. for  $\text{C}_{23}\text{H}_{20}\text{Cl}_2\text{NaN}_2\text{O}_5$

[M+Na]<sup>+</sup>: 497.0647; Found: 497.0648.

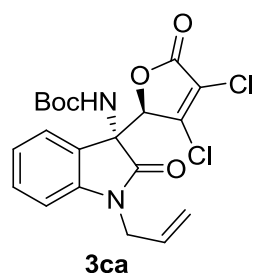

*tert*-butyl(*R*)-1-allyl-3-((*R*)-3,4-dichloro-5-oxo-2,5-dihydrofuran-2-yl)-2-oxoindolin-3-ylcarbamate (**3ca**), white solid, yield 97 %, 68/32 dr, Enantiomeric excess: 94 %, determined by HPLC (Chiralcel AD-H column, hexane/*i*-propanol = 50/50, flow rate 0.6 mL/min, UV detection at 220 nm),  $t_R$  (minor) = 7.5 min,  $t_R$  (major) = 15.0 min. <sup>1</sup>H NMR (300 MHz, CDCl<sub>3</sub>) δ 7.38-7.29 (m, 2H), 7.07-7.05 (m, 1H), 6.89-6.82 (m, 1H), 5.83-5.80 (m, 1H), 5.68-5.64 (m, 2H), 5.28-5.22 (m, 2H), 4.47-4.18 (m, 2H), 1.33 (s, 9H); <sup>13</sup>C NMR (75MHz, CDCl<sub>3</sub>) δ 170.7, 163.6, 153.5, 147.9, 143.0, 130.7, 130.4, 124.5, 124.1, 123.5, 118.7, 118.2, 109.8, 82.3, 81.2, 63.4, 43.1, 28.1; HRMS (ESI) Calcd. for C<sub>20</sub>H<sub>20</sub>Cl<sub>2</sub>NaN<sub>2</sub>O<sub>5</sub> [M+Na]<sup>+</sup>: 461.0647; Found: 461.0652.

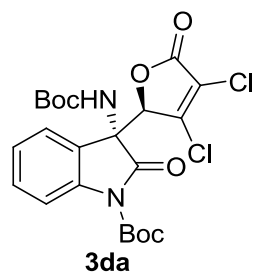

(*R*)-*tert*-butyl-3-(*tert*-butoxycarbonylamino)-3-((*R*)-3,4-dichloro-5-oxo-2,5-dihydrofuran-2-yl)-2-oxoindolin-1-carboxylate (**3da**), white solid, yield 66 %, 75/25 dr, Enantiomeric excess: 83 %, determined by HPLC (Chiralcel IC-H column, hexane/ethanol = 90/10, flow rate 1.0 mL/min, UV detection at 220 nm),  $t_R$  (major) = 9.6 min,  $t_R$  (minor) = 11.7 min. <sup>1</sup>H NMR (300 MHz, CDCl<sub>3</sub>) δ 7.89-7.84 (m, 1H), 7.41-7.36 (m, 1H), 7.24-7.12 (m, 2H), 5.78 (s, 1H), 5.44 (s, 1H), 1.63 (s, 9H), 1.26 (s, 9H); <sup>13</sup>C NMR (75MHz, CDCl<sub>3</sub>) δ 170.9, 169.7, 163.2, 153.1, 148.4,

147.0, 139.8, 130.8, 125.2, 124.5, 123.2, 115.8, 85.0, 83.2, 81.0, 63.8, 28.0, 27.8; **HRMS (ESI)**

Calcd. for  $C_{22}H_{24}Cl_2NaN_2O_7$   $[M+Na]^+$ : 521.0858; Found: 521.0863.

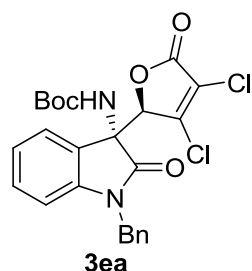

**tert-butyl(R)-1-benzyl-3-((R)-3,4-dichloro-5-oxo-2,5-dihydrofuran-2-yl)-2-oxoindolin-3-ylcar**

**bamate (3ea)**, white solid, yield 94 %, 67/33 dr, Enantiomeric excess: 96 %, determined by HPLC

(Chiralcel IC-H column, hexane/*i*-propanol = 50/50, flow rate 0.6 mL/min, UV detection at 220

nm),  $t_R$  (minor) = 7.6 min,  $t_R$  (major) = 8.6 min.  **$^1H$  NMR** (300 MHz,  $CDCl_3$ )  $\delta$  7.43-7.22 (m, 7H),

7.05-7.03 (m, 1H), 6.78-6.72 (m, 1H), 5.69-5.62 (m, 2H), 5.10-5.03 (m, 1H), 4.79-4.66 (m, 1H),

1.36 (s, 9H);  **$^{13}C$  NMR** (75MHz,  $CDCl_3$ )  $\delta$  172.0, 163.6, 153.8, 148.1, 143.8, 134.8, 130.7, 128.8,

127.8, 127.3, 124.5, 124.2, 123.5, 123.0, 109.9, 82.3, 81.2, 63.4, 44.7, 28.1; **HRMS (ESI)** Calcd.

for  $C_{24}H_{22}Cl_2NaN_2O_5$   $[M+Na]^+$ : 511.0803; Found: 511.0800.

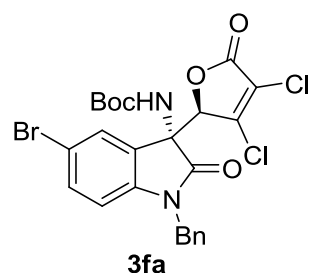

**tert-butyl(R)-1-benzyl-5-bromo-3-((R)-3,4-dichloro-5-oxo-2,5-dihydrofuran-2-yl)-2-oxoindoli**

**n-3-ylcarbamate (3fa)**, white solid, yield 69 %, 58/42 dr, Enantiomeric excess: 90 %, determined

by HPLC (Chiralcel AD-H column, hexane/*i*-propanol = 50/50, flow rate 0.6 mL/min, UV

detection at 220 nm),  $t_R$  (minor) = 8.9 min,  $t_R$  (major) = 12.4 min.  **$^1H$  NMR** (300 MHz,  $CDCl_3$ )  $\delta$

7.38-7.30 (m, 7H), 6.63-6.57 (m, 1H), 5.72-5.59 (m, 2H), 5.11-5.00 (m, 1H), 4.78-4.66 (m, 1H),

1.40 (s, 9H);  $^{13}\text{C}$  NMR (75MHz,  $\text{CDCl}_3$ )  $\delta$  170.6, 162.6, 153.8, 148.0, 142.9, 134.4, 133.5, 128.9, 128.0, 127.8, 127.5, 125.9, 123.7, 116.3, 111.4, 81.7, 81.5, 63.4, 44.7, 28.1; HRMS (ESI) Calcd. for  $\text{C}_{24}\text{H}_{21}\text{BrCl}_2\text{NaN}_2\text{O}_5$   $[\text{M}+\text{Na}]^+$ : 590.9888; Found: 590.9903.

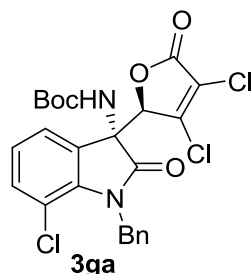

**tert-butyl(R)-1-benzyl-7-chloro-3-((R)-3,4-dichloro-5-oxo-2,5-dihydrofuran-2-yl)-2-oxoindolin-3-ylcarbamate (3ga)**, white solid, yield 77 %, 50/50 dr, Enantiomeric excess: 91 %, determined by HPLC (Chiralcel AD-H column, hexane/ethanol = 50/50+0.1% TFA, flow rate 0.7 mL/min, UV detection at 220 nm),  $t_R$  (minor) = 10.7 min,  $t_R$  (major) = 17.3 min.  $^1\text{H}$  NMR (300 MHz,  $\text{CDCl}_3$ )  $\delta$  7.43-7.41 (m, 1H), 7.34-7.29 (m, 3H), 7.25-7.23 (m, 3H), 7.03-6.99 (m, 1H), 5.73-5.55 (m, 2H), 5.44 (s, 1H), 5.22 (s, 1H), 1.37 (s, 9H);  $^{13}\text{C}$  NMR (75MHz,  $\text{CDCl}_3$ )  $\delta$  171.9, 163.4, 153.4, 147.7, 139.2, 136.3, 133.1, 128.5, 127.8, 127.2, 127.0, 126.6, 124.4, 122.7, 116.2, 82.1, 81.6, 62.8, 45.9, 28.1; HRMS (ESI) Calcd. for  $\text{C}_{24}\text{H}_{21}\text{Cl}_3\text{NaN}_2\text{O}_5$   $[\text{M}+\text{Na}]^+$ : 545.0414; Found: 545.0402.

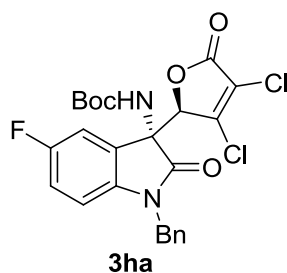

**tert-butyl(R)-1-benzyl-3-((R)-3,4-dichloro-5-oxo-2,5-dihydrofuran-2-yl)-5-fluoro-2-oxoindolin-3-ylcarbamate (3ha)**, white solid, yield 87 %, 61/39 dr, Enantiomeric excess: 88 %, determined by HPLC (Chiralcel AD-H column, hexane/*i*-propanol = 50/50, flow rate 0.6 mL/min, UV detection at 220 nm),  $t_R$  (minor) = 8.7 min,  $t_R$  (major) = 12.1 min.  $^1\text{H}$  NMR (300 MHz,  $\text{CDCl}_3$ )  $\delta$

7.38-7.29 (m, 6H), 6.96-6.92 (m, 1H), 6.69-6.65 (m, 1H), 5.74-5.64 (m, 2H), 5.08-5.01 (m, 1H), 4.79-4.65 (m, 1H), 1.39 (s, 9H);  $^{13}\text{C}$  NMR (75MHz,  $\text{CDCl}_3$ )  $\delta$  170.9, 161.0 ( $J_{\text{C-F}} = 241.8$  Hz), 153.7, 148.1, 146.9, 138.2, 134.2, 128.9, 127.9, 127.3, 123.6, 117.0 ( $J_{\text{C-F}} = 23.4$  Hz), 113.0, 112.7, 110.6 ( $J_{\text{C-F}} = 7.8$  Hz), 81.6, 80.5, 63.5, 44.7, 28.1; **HRMS (ESI)** Calcd. for  $\text{C}_{24}\text{H}_{21}\text{Cl}_2\text{FNaN}_2\text{O}_5$   $[\text{M}+\text{Na}]^+$ : 529.0709; Found: 529.0709.

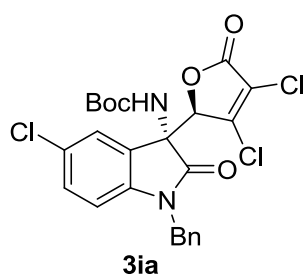

***tert*-butyl(*R*)-1-benzyl-5-chloro-3-((*R*)-3,4-dichloro-5-oxo-2,5-dihydrofuran-2-yl)-2-oxoindole-1-carbamate (3ia)**, white solid, yield 77 %, 60/40 dr, Enantiomeric excess: 90 %, determined by HPLC (Chiralcel AD-H column, hexane/*i*-propanol = 50/50, flow rate 0.6 mL/min, UV detection at 220 nm),  $t_{\text{R}}$  (minor) = 8.6 min,  $t_{\text{R}}$  (major) = 11.7 min.  $^1\text{H}$  NMR (300 MHz,  $\text{CDCl}_3$ )  $\delta$  7.47 (s, 1H), 7.35-7.31 (m, 5H), 7.23-7.20 (m, 1H), 6.68-6.61 (m, 1H), 5.73-5.60 (m, 2H), 5.12-5.01 (m, 1H), 4.78-4.60 (m, 1H), 1.40 (s, 9H);  $^{13}\text{C}$  NMR (75MHz,  $\text{CDCl}_3$ )  $\delta$  170.7, 163.3, 153.6, 148.0, 141.5, 134.0, 130.4, 129.0, 128.5, 127.9, 127.5, 127.3, 125.0, 123.6, 110.9, 81.6, 81.5, 63.4, 44.7, 28.1; **HRMS (ESI)** Calcd. for  $\text{C}_{24}\text{H}_{21}\text{Cl}_3\text{NaN}_2\text{O}_5$   $[\text{M}+\text{Na}]^+$ : 545.0414; Found: 545.0402.

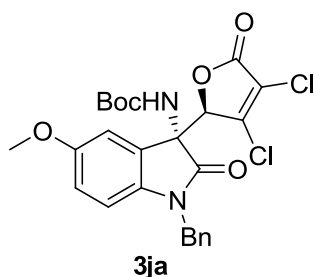

***tert*-butyl(*R*)-1-benzyl-3-((*R*)-3,4-dichloro-5-oxo-2,5-dihydrofuran-2-yl)-5-methoxy-2-oxoindole-1-carbamate (3ja)**

**lin-3-ylcarbamate (3ja)**, white solid, yield 95 %, 65/35 dr, Enantiomeric excess: 92 %, determined by HPLC (Chiralcel IC-H column, hexane/*i*-propanol = 50/50, flow rate 1 mL/min, UV detection at 220 nm),  $t_R$  (minor) = 10.1 min,  $t_R$  (major) = 12.6 min.  $^1\text{H NMR}$  (300 MHz,  $\text{CDCl}_3$ )  $\delta$  7.41-7.29 (m, 5H), 7.03-7.00 (m, 1H), 6.77-6.74 (m, 1H), 6.66-6.58 (m, 1H), 5.69-5.66 (m, 2H), 5.12-5.02 (m, 1H), 4.75-4.64 (m, 1H), 3.71 (s, 3H), 1.38 (s, 9H);  $^{13}\text{C NMR}$  (75MHz,  $\text{CDCl}_3$ )  $\delta$  170.7, 163.7, 156.4, 153.5, 147.3, 136.1, 134.6, 128.8, 127.7, 127.3, 125.9, 123.4, 115.3, 110.9, 110.6, 82.1, 80.7, 63.6, 55.8, 44.6, 28.1; **HRMS (ESI)** Calcd. for  $\text{C}_{25}\text{H}_{24}\text{Cl}_2\text{NaN}_2\text{O}_6$   $[\text{M}+\text{Na}]^+$ : 541.0909; Found: 541.0916.

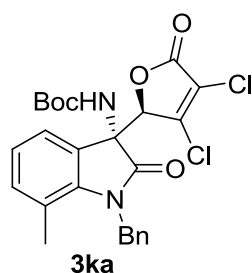

**tert-butyl(R)-1-benzyl-3-((R)-3,4-dichloro-5-oxo-2,5-dihydrofuran-2-yl)-7-methyl-2-oxoindolin-3-ylcarbamate (3ka)**, white solid, yield 93 %, 64/36 dr, Enantiomeric excess: 91 %, determined by HPLC (Chiralcel AD-H column, hexane/*i*-propanol = 50/50, flow rate 0.6 mL/min, UV detection at 220 nm),  $t_R$  (minor) = 8.7 min,  $t_R$  (major) = 17.8 min.  $^1\text{H NMR}$  (300 MHz,  $\text{CDCl}_3$ )  $\delta$  7.38-7.22 (m, 6H), 7.03-6.93 (m, 2H), 5.72-5.62 (m, 2H), 5.40 (d,  $J$  = 16.8 Hz, 1H), 4.96 (d,  $J$  = 16.8 Hz, 1H), 2.26 (s, 3H), 1.39 (s, 9H);  $^{13}\text{C NMR}$  (75MHz,  $\text{CDCl}_3$ )  $\delta$  172.2, 163.7, 153.6, 148.1, 141.0, 136.7, 134.5, 128.8, 127.2, 126.0, 125.8, 123.6, 122.9, 122.0, 120.6, 82.3, 81.0, 62.9, 45.9, 28.1, 18.8; **HRMS (ESI)** Calcd. for  $\text{C}_{25}\text{H}_{24}\text{Cl}_2\text{NaN}_2\text{O}_5$   $[\text{M}+\text{Na}]^+$ : 525.0960; Found: 525.0962.



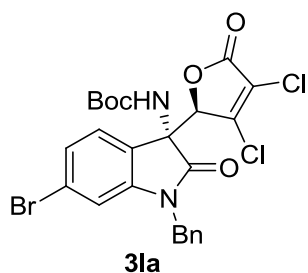

**tert-butyl(*R*)-1-benzyl-6-bromo-3-((*R*)-3,4-dichloro-5-oxo-2,5-dihydrofuran-2-yl)-2-oxindolin-3-ylcarbamate (3la)**, white solid, yield 70 %, 63/37 dr, Enantiomeric excess: 90 %, determined by HPLC (Chiralcel AD-H column, hexane/*i*-propanol = 50/50, flow rate 0.6 mL/min, UV detection at 220 nm),  $t_R$  (minor) = 7.5 min,  $t_R$  (major) = 12.3 min.  $^1\text{H NMR}$  (300 MHz,  $\text{CDCl}_3$ )  $\delta$  7.41-7.18 (m, 7H), 6.91-6.85 (m, 1H), 5.71-5.62 (m, 2H), 5.12-5.01 (m, 1H), 4.76-4.64 (m, 1H), 1.39 (s, 9H);  $^{13}\text{C NMR}$  (75MHz,  $\text{CDCl}_3$ )  $\delta$  172.0, 163.4, 153.7, 147.8, 145.1, 134.0, 128.9, 127.9, 127.6, 127.2, 126.0, 125.4, 124.3, 123.7, 113.2, 82.0, 80.5, 63.0, 44.8, 28.1; **HRMS (ESI)** Calcd. for  $\text{C}_{24}\text{H}_{21}\text{BrCl}_2\text{NaN}_2\text{O}_5$   $[\text{M}+\text{Na}]^+$ : 590.9879; Found: 590.9895.

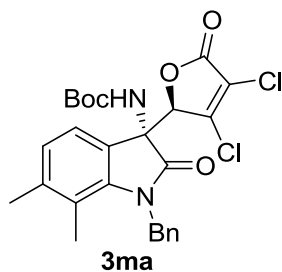

**tert-butyl(*R*)-1-benzyl-3-((*R*)-3,4-dichloro-5-oxo-2,5-dihydrofuran-2-yl)-6,7-dimethyl-2-oxindolin-3-ylcarbamate (3ma)**, white solid, yield 56 %, 59/41 dr, Enantiomeric excess: 91 %, determined by HPLC (Chiralcel AD-H column, hexane/*i*-propanol = 50/50, flow rate 0.6 mL/min, UV detection at 220 nm),  $t_R$  (minor) = 8.2 min,  $t_R$  (major) = 15.9 min.  $^1\text{H NMR}$  (300 MHz,  $\text{CDCl}_3$ )  $\delta$  7.35-7.22 (m, 5H), 7.17-7.01 (m, 1H), 6.89-6.85 (m, 1H), 5.68 (s, 2H), 5.41-5.28 (m, 1H), 5.12-4.93 (m, 1H), 2.20 (s, 3H), 2.10 (s, 3H), 1.39 (s, 9H).  $^{13}\text{C NMR}$  (75MHz,  $\text{CDCl}_3$ )  $\delta$  172.8, 163.8, 153.6, 148.2, 141.2, 137.0, 136.8, 128.8, 127.1, 126.0, 125.4, 124.7, 123.5, 121.4, 119.8,

82.5, 81.1, 62.7, 46.7, 28.2, 21.0, 14.0; **HRMS (ESI)** Calcd. for  $C_{26}H_{26}Cl_2NaN_2O_5$   $[M+Na]^+$ :

539.1116; Found: 539.1113.

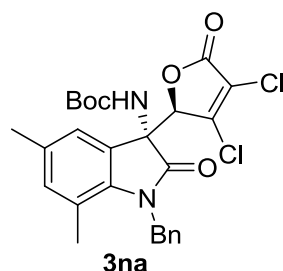

***tert*-butyl(*R*)-1-benzyl-3-((*R*)-3,4-dichloro-5-oxo-2,5-dihydrofuran-2-yl)-5,7-dimethyl-2-oxoin-  
dolin-3-ylcarbamate (3na)**, white solid, yield 92 %, 65/35 dr, Enantiomeric excess: 88 %, determined by HPLC (Chiralcel AD-H column, hexane/*i*-propanol = 50/50, flow rate 0.6 mL/min, UV detection at 220 nm),  $t_R$  (minor) = 7.3 min,  $t_R$  (major) = 15.4 min.  **$^1H$  NMR** (300 MHz,  $CDCl_3$ )  $\delta$  7.34-7.30 (m, 3H), 7.27-7.21 (m, 2H), 7.13 (s, 1H), 6.82 (s, 1H), 5.70-5.61 (m, 2H), 5.37 (d,  $J$  = 16.8 Hz, 1H), 4.93 (d,  $J$  = 16.8 Hz, 1H), 2.24 (s 3H), 2.20 (s, 3H), 1.40 (s, 9H).  **$^{13}C$  NMR** (75 MHz,  $CDCl_3$ )  $\delta$  172.0, 163.7, 153.7, 148.2, 138.3, 136.7, 134.9, 133.2, 130.8, 128.8, 127.1, 125.9, 124.3, 122.7, 120.2, 82.2, 81.1, 63.0, 45.8, 28.1, 20.7, 18.5; **HRMS (ESI)** Calcd. for  $C_{26}H_{26}Cl_2NaN_2O_5$   $[M+Na]^+$ : 539.1116; Found: 539.1105.

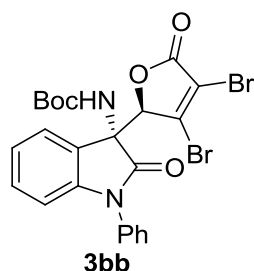

***tert*-butyl(*R*)-3-((*R*)-3,4-dibromo-5-oxo-2,5-dihydrofuran-2-yl)-2-oxo-1-phenylindolin-3-ylcarbamate (3bb)**, white solid, yield 93 %, 59/41 dr, Enantiomeric excess: 90 %, determined by HPLC (Chiralcel AD-H column, hexane/*i*-propanol = 50/50, flow rate 0.6 mL/min, UV detection at 220 nm),  $t_R$  (minor) = 16.9 min,  $t_R$  (major) = 21.3 min.  **$^1H$  NMR** (300 MHz,  $CDCl_3$ )  $\delta$  7.54-7.51

(m, 3H), 7.44-7.39 (m, 2H), 7.30-7.28 (m, 2H), 7.10-6.89 (m, 2H), 5.87 (s, 1H), 5.59 (s, 1H), 1.35 (s, 9H);  $^{13}\text{C}$  NMR (75 MHz,  $\text{CDCl}_3$ )  $\delta$  170.5, 164.6, 153.4, 145.0, 142.0, 133.9, 130.7, 129.7, 128.2, 126.5, 126.0, 124.1, 123.9, 117.8, 110.1, 85.5, 81.2, 63.5, 28.1; **HRMS (ESI)** Calcd. for  $\text{C}_{23}\text{H}_{20}\text{Br}_2\text{NaN}_2\text{O}_5$   $[\text{M}+\text{Na}]^+$ : 586.9616; Found: 586.9632.

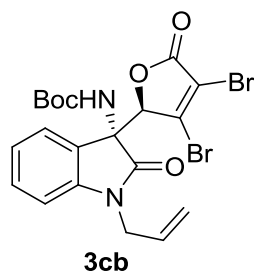

**tert-butyl(R)-1-allyl-3-((R)-3,4-dibromo-5-oxo-2,5-dihydrofuran-2-yl)-2-oxoindolin-3-ylcarbamate (3cb)**, white solid, yield 95 %, 68/32 dr, Enantiomeric excess: 92 %, determined by HPLC (Chiralcel AD-H column, hexane/*i*-propanol = 50/50, flow rate 0.6 mL/min, UV detection at 220 nm),  $t_R$  (minor) = 11.6 min,  $t_R$  (major) = 28.1 min.  $^1\text{H}$  NMR (300 MHz,  $\text{CDCl}_3$ )  $\delta$  7.35-7.28 (m, 2H), 7.06-7.01 (m, 1H), 6.88-6.81 (m, 1H), 5.93-5.72 (m, 1H), 5.70-5.66 (m, 2H), 5.45-5.39 (m, 1H), 5.29-5.25 (m, 1H), 4.46-4.41 (m, 1H), 4.30-4.19 (m, 1H), 1.33 (s, 9H);  $^{13}\text{C}$  NMR (75 MHz,  $\text{CDCl}_3$ )  $\delta$  170.8, 164.6, 153.4, 143.0, 142.2, 130.7, 130.3, 124.0, 123.4, 118.6, 118.2, 117.6, 109.8, 84.7, 81.1, 63.4, 43.2, 28.1; **HRMS (ESI)** Calcd. for  $\text{C}_{20}\text{H}_{20}\text{Br}_2\text{NaN}_2\text{O}_5$   $[\text{M}+\text{Na}]^+$ : 550.9616; Found: 550.9615.

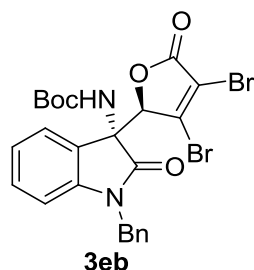

**tert-butyl(R)-1-benzyl-3-((R)-3,4-dibromo-5-oxo-2,5-dihydrofuran-2-yl)-2-oxoindolin-3-ylcarbamate (3eb)**, white solid, yield 95 %, 65/35 dr, Enantiomeric excess: 91 %, determined by

HPLC (Chiralcel AD-H column, hexane/*i*-propanol = 50/50, flow rate 0.6 mL/min, UV detection at 220 nm),  $t_R$  (minor) = 8.3 min,  $t_R$  (major) = 17.7 min.  $^1\text{H NMR}$  (300 MHz,  $\text{CDCl}_3$ )  $\delta$  7.45-7.40 (m, 1H), 7.32-7.21 (m, 6H), 7.06-7.01 (m, 1H), 6.76-6.69 (m, 1H), 5.75(dd,  $J = 9.5, 15.4$  Hz, 2H), 5.16 (d,  $J = 15.6$  Hz, 1H), 4.72 (dd,  $J = 10.0, 15.5$  Hz, 1H), 1.36 (s, 9H);  $^{13}\text{C NMR}$  (75 MHz,  $\text{CDCl}_3$ )  $\delta$  171.2, 164.6, 153.5, 143.9, 142.3, 134.5, 130.3, 128.7, 127.7, 127.4, 124.1, 123.5, 118.6, 117.6, 109.8, 83.2, 81.2, 63.4, 44.7, 28.1; **HRMS (ESI)** Calcd. for  $\text{C}_{24}\text{H}_{22}\text{Br}_2\text{NaN}_2\text{O}_5$   $[\text{M}+\text{Na}]^+$ : 600.9773; Found: 600.9786.

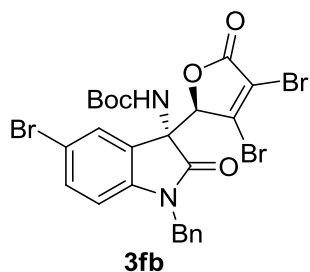

***tert*-butyl(*R*)-1-benzyl-5-bromo-3-((*R*)-3,4-dibromo-5-oxo-2,5-dihydrofuran-2-yl)-2-oxoindolin-3-ylcarbamate (3fb)**, white solid, yield 59 %, 60/40 dr, Enantiomeric excess: 90 %, determined by HPLC (Chiralcel AD-H column, hexane/*i*-propanol = 50/50, flow rate 0.6 mL/min, UV detection at 220 nm),  $t_R$  (minor) = 10.7 min,  $t_R$  (major) = 13.8 min.  $^1\text{H NMR}$  (300 MHz,  $\text{CDCl}_3$ )  $\delta$  7.60 (s, 1H), 7.36-7.27 (m, 6H), 6.61-.6.56 (m, 1H), 5.72-5.69 (m, 1H), 5.60 (s, 1H), 5.12 (d,  $J = 15.2$  Hz, 1H), 4.71 (dd,  $J = 5.7, 15.7$  Hz, 1H), 1.40 (s, 9H);  $^{13}\text{C NMR}$  (75 MHz,  $\text{CDCl}_3$ )  $\delta$  171.1, 164.4, 153.4, 144.3, 141.9, 133.9, 128.8, 128.0, 127.3, 126.4, 125.9, 124.2, 123.8, 117.8, 113.3, 84.5, 81.4, 63.1, 44.8, 28.1; **HRMS (ESI)** Calcd. for  $\text{C}_{24}\text{H}_{21}\text{Br}_3\text{NaN}_2\text{O}_5$   $[\text{M}+\text{Na}]^+$ : 680.8857; Found: 680.8887.

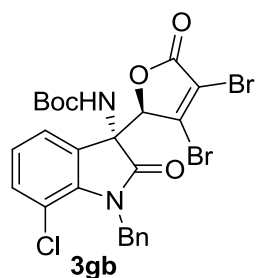

**tert-butyl(*R*)-1-benzyl-7-chloro-3-((*R*)-3,4-dibromo-5-oxo-2,5-dihydrofuran-2-yl)-2-oxoindolin-3-ylcarbamate (3gb)**, white solid, yield 60 %, 64/36 dr, Enantiomeric excess: 92 %, determined by HPLC (Chiralcel AD-H column, hexane/*i*-propanol = 50/50, flow rate 0.6 mL/min, UV detection at 220 nm),  $t_R$  (minor) = 10.0 min,  $t_R$  (major) = 29.8 min.  $^1\text{H NMR}$  (300 MHz,  $\text{CDCl}_3$ )  $\delta$  7.45-7.43 (m, 1H), 7.34-7.24 (m, 6H), 7.03-6.95 (m, 1H), 5.76-5.75 (m, 1H), 5.51 (d,  $J$  = 16.0 Hz, 1H), 5.36-5.32 (m, 1H), 5.15 (d,  $J$  = 16.0 Hz, 1H), 1.37 (s, 9H);  $^{13}\text{C NMR}$  (75 MHz,  $\text{CDCl}_3$ )  $\delta$  172.0, 164.4, 153.3, 141.8, 139.1, 136.3, 133.1, 131.6, 128.4, 127.2, 126.6, 124.3, 122.5, 117.9, 116.1, 84.6, 81.5, 62.9, 45.9, 28.1; HRMS (ESI) Calcd. for  $\text{C}_{24}\text{H}_{21}\text{Br}_2\text{ClNaN}_2\text{O}_5$   $[\text{M}+\text{Na}]^+$ : 634.9383; Found: 634.9390.

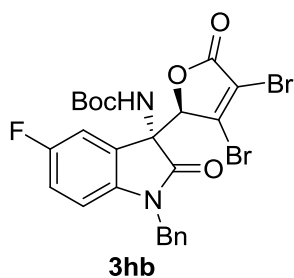

**tert-butyl(*R*)-1-benzyl-3-((*R*)-3,4-dibromo-5-oxo-2,5-dihydrofuran-2-yl)-5-fluoro-2-oxoindolin-3-ylcarbamate (3hb)**, white solid, yield 64 %, 64/36 dr, Enantiomeric excess: 89 %, determined by HPLC (Chiralcel AD-H column, hexane/*i*-propanol = 50/50, flow rate 0.6 mL/min, UV detection at 220 nm),  $t_R$  (minor) = 10.7 min,  $t_R$  (major) = 13.5 min;  $^1\text{H NMR}$  (300 MHz,  $\text{CDCl}_3$ )  $\delta$  7.39-7.21 (m, 6H), 6.96-6.93 (m, 1H), 6.65-6.60 (m, 1H), 5.72-5.65 (m, 2H), 5.14 (d,  $J$  = 15.7 Hz, 1H), 4.72 (d,  $J$  = 15.5 Hz, 1H), 1.40 (s, 9H);  $^{13}\text{C NMR}$  (75 MHz,  $\text{CDCl}_3$ )  $\delta$  170.9, 164.4, 160.9

( $J_{C-F} = 241.2$  Hz), 153.9, 142.2, 134.5, 128.8, 127.9, 127.4, 118.8, 117.7, 116.9 ( $J_{C-F} = 23.1$  Hz), 113.4, 112.6, 110.7 ( $J_{C-F} = 7.9$  Hz), 84.1, 81.5, 63.6, 44.8, 28.2; **HRMS (ESI)** Calcd. for  $C_{24}H_{21}Br_2FNaN_2O_5$  [ $M+Na$ ] $^+$ : 618.9678; Found: 618.9679.

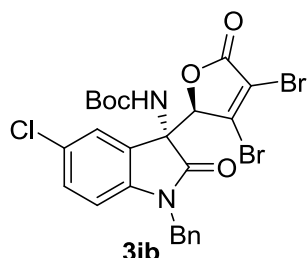

**tert-butyl(R)-1-benzyl-5-chloro-3-((R)-3,4-dibromo-5-oxo-2,5-dihydrofuran-2-yl)-2-oxoindolin-3-ylcarbamate (3ib)**, white solid, yield 65 %, 63/37 dr, Enantiomeric excess: 87 %, determined by HPLC (Chiralcel AD-H column, hexane/*i*-propanol = 50/50, flow rate 0.6 mL/min, UV detection at 220 nm),  $t_R$  (minor) = 10.1 min,  $t_R$  (major) = 12.9 min;  $^1H$  NMR (300 MHz,  $CDCl_3$ )  $\delta$  7.45-7.28 (m, 6H), 7.22-7.19 (m, 1H), 6.66-6.61 (m, 1H), 5.73 (d,  $J = 7.2$  Hz, 2H), 5.13 (d,  $J = 15.6$  Hz, 1H), 4.71 (dd,  $J = 7.2, 15.6$  Hz, 1H), 1.40 (s, 9H);  $^{13}C$  NMR (75 MHz,  $CDCl_3$ )  $\delta$  171.6, 164.3, 153.8, 142.5, 141.5, 134.4, 130.6, 128.9, 128.5, 127.9, 127.5, 126.8, 125.2, 124.9, 110.9, 83.1, 81.6, 63.5, 44.7, 28.2; **HRMS (ESI)** Calcd. for  $C_{24}H_{21}Br_2ClNaN_2O_5$  [ $M+Na$ ] $^+$ : 634.9383; Found: 634.9386.

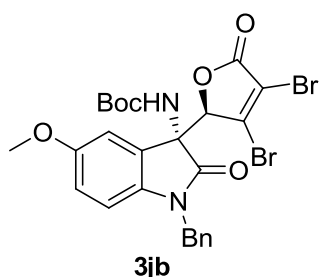

**tert-butyl(R)-1-benzyl-3-((R)-3,4-dibromo-5-oxo-2,5-dihydrofuran-2-yl)-5-methoxy-2-oxoindolin-3-ylcarbamate (3jb)**, white solid, yield 82 %, 66/34 dr, Enantiomeric excess: 91 %, determined by HPLC (Chiralcel AD-H column, hexane/*i*-propanol = 50/50, flow rate 0.6 mL/min,

UV detection at 220 nm),  $t_R$  (minor) = 15.8 min,  $t_R$  (major) = 30.1 min;  $^1\text{H NMR}$  (300 MHz,  $\text{CDCl}_3$ )  $\delta$  7.42-7.00 (m, 5H), 6.76-6.74 (m, 1H), 6.68-6.64 (m, 1H), 6.61-6.58 (m, 1H), 5.72-5.68 (m, 2H), 5.15 (dd,  $J$  = 6.8, 15.3 Hz, 1H), 4.67 (d,  $J$  = 15.3 Hz, 1H), 3.70 (s, 3H), 1.38 (s, 9H);  $^{13}\text{C NMR}$  (75 MHz,  $\text{CDCl}_3$ )  $\delta$  170.9, 164.7, 156.4, 154.0, 142.4, 137.2, 134.9, 130.8, 128.7, 127.7, 126.0, 117.6, 115.4, 111.9, 110.5, 84.6, 81.4, 63.8, 55.8, 44.9, 28.1; **HRMS (ESI)** Calcd. for  $\text{C}_{25}\text{H}_{24}\text{Br}_2\text{NaN}_2\text{O}_6$   $[\text{M}+\text{Na}]^+$ : 630.9878; Found: 630.9890.

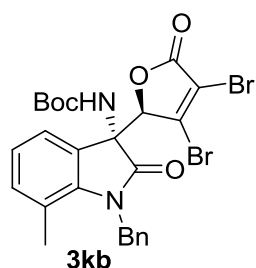

**tert-butyl(*R*)-1-benzyl-3-((*R*)-3,4-dibromo-5-oxo-2,5-dihydrofuran-2-yl)-7-methyl-2-oxoindolin-3-ylcarbamate (3kb)**, white solid, yield 96 %, 60/40 dr, Enantiomeric excess: 91 %, determined by HPLC (Chiralcel IC-H column, hexane/*i*-propanol = 75/25, flow rate 1.0 mL/min, UV detection at 220 nm),  $t_R$  (minor) = 6.0 min,  $t_R$  (major) = 6.4 min;  $^1\text{H NMR}$  (300 MHz,  $\text{CDCl}_3$ )  $\delta$  7.39-7.35 (m, 3H), 7.33-7.27 (m, 3H), 7.01-6.94 (m, 2H), 5.76 (d,  $J$  = 8.6 Hz, 2H), 5.45 (d,  $J$  = 16.8 Hz, 1H), 4.91 (dd,  $J$  = 8.4, 16.9 Hz, 1H), 2.21 (s, 3H), 1.39 (s, 9H);  $^{13}\text{C NMR}$  (75 MHz,  $\text{CDCl}_3$ )  $\delta$  172.2, 164.6, 153.7, 142.2, 141.4, 136.7, 134.4, 128.8, 127.2, 126.0, 125.6, 123.6, 121.8, 120.5, 117.7, 83.5, 81.1, 62.9, 45.9, 28.1, 18.7; **HRMS (ESI)** Calcd. for  $\text{C}_{25}\text{H}_{24}\text{Br}_2\text{N}_2\text{O}_5$   $[\text{M}+\text{Na}]^+$ : 614.9929; Found: 614.9910.

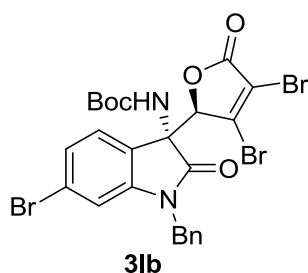

***tert*-butyl(*R*)-1-benzyl-6-bromo-3-((*R*)-3,4-dibromo-5-oxo-2,5-dihydrofuran-2-yl)-2-oxoindolin-3-ylcarbamate (3lb)**, white solid, yield 71 %, 60/40 dr, Enantiomeric excess: 93 %, determined by HPLC (Chiralcel AD-H column, hexane/ethanol = 50/50, flow rate 0.6 mL/min, UV detection at 220 nm),  $t_R$  (major) = 17.3 min,  $t_R$  (minor) = 20.1 min;  $^1\text{H NMR}$  (300 MHz,  $\text{CDCl}_3$ )  $\delta$  7.40-7.29 (m, 5H), 7.20-7.16 (m, 2H), 6.88-6.84 (m, 1H), 5.74 (d,  $J = 5.7$  Hz, 1H), 5.60 (s, 1H), 5.12 (d,  $J = 15.7$  Hz, 1H), 4.68 (dd,  $J = 5.4, 15.6$  Hz, 1H), 1.37 (s, 9H);  $^{13}\text{C NMR}$  (75 MHz,  $\text{CDCl}_3$ )  $\delta$  170.2, 164.3, 153.5, 142.0, 134.0, 133.3, 131.8, 128.8, 127.9, 127.6, 127.4, 126.1, 117.7, 116.2, 111.4, 83.1, 81.6, 63.4, 44.7, 28.2; **HRMS (ESI)** Calcd. for  $\text{C}_{24}\text{H}_{21}\text{Br}_3\text{NaN}_2\text{O}_5$   $[\text{M}+\text{Na}]^+$ : 678.8878; Found: 678.8866.

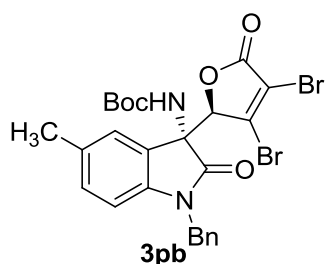

***tert*-butyl(*R*)-1-benzyl-3-((*R*)-3,4-dibromo-5-oxo-2,5-dihydrofuran-2-yl)-5-methyl-2-oxoindolin-3-ylcarbamate (3pb)**, white solid, yield 95 %, 66/34 dr, Enantiomeric excess: 88 %, determined by HPLC (Chiralcel AD-H column, hexane/*i*-propanol = 50/50, flow rate 0.6 mL/min, UV detection at 220 nm),  $t_R$  (minor) = 9.8 min,  $t_R$  (major) = 25.5 min;  $^1\text{H NMR}$  (300 MHz,  $\text{CDCl}_3$ )  $\delta$  7.42-7.40 (m, 1H), 7.35-7.23 (m, 4H), 7.19 (s, 1H), 7.04-7.01 (m, 1H), 6.63-6.57 (m, 1H), 5.71-5.67 (m, 2H), 5.11-5.06 (m, 1H), 4.69-4.63 (m, 1H), 2.25 (s, 3H), 1.38 (s, 9H);  $^{13}\text{C NMR}$  (75 MHz,  $\text{CDCl}_3$ )  $\delta$  171.0, 164.6, 153.5, 142.5, 140.5, 134.6, 133.2, 132.6, 130.6, 128.7, 127.7, 124.9, 124.0, 117.5, 109.6, 84.7, 81.1, 63.6, 44.6, 28.2, 21.0; **HRMS (ESI)** Calcd. for  $\text{C}_{25}\text{H}_{24}\text{Br}_2\text{NaN}_2\text{O}_5$   $[\text{M}+\text{Na}]^+$ : 614.9929; Found: 614.9910.



## X-Ray Crystal Data for Compound 3aa

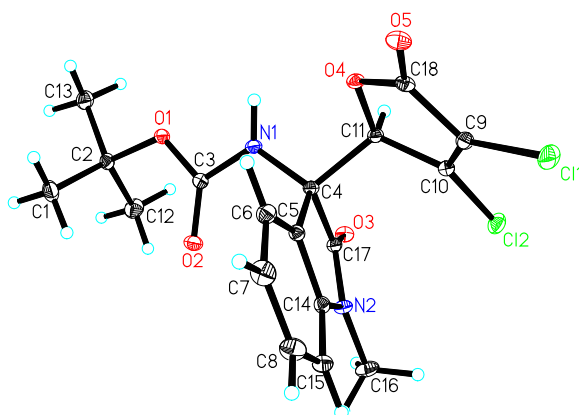

Table 1. Crystal data and structure refinement for **3aa**

|                                   |                                                                               |                 |
|-----------------------------------|-------------------------------------------------------------------------------|-----------------|
| Empirical formula                 | C <sub>18</sub> H <sub>18</sub> Cl <sub>2</sub> N <sub>2</sub> O <sub>5</sub> |                 |
| Formula weight                    | 413.24                                                                        |                 |
| Temperature                       | 100(2) K                                                                      |                 |
| Wavelength                        | 0.71073 Å                                                                     |                 |
| Crystal system, space group       | Orthorhombic, P 21 21 21                                                      |                 |
| Unit cell dimensions              | a = 8.5564(8) Å                                                               | alpha = 90 deg. |
|                                   | b = 9.1450(8) Å                                                               | beta = 90 deg.  |
|                                   | c = 24.531(2) Å                                                               | gamma = 90 deg. |
| Volume                            | 1919.5(3) Å <sup>3</sup>                                                      |                 |
| Z, Calculated density             | 4, 1.430 Mg/m <sup>3</sup>                                                    |                 |
| Absorption coefficient            | 0.370 mm <sup>-1</sup>                                                        |                 |
| F(000)                            | 856                                                                           |                 |
| Crystal size                      | 0.38 x 0.22 x 0.10 mm                                                         |                 |
| Theta range for data collection   | 1.66 to 30.67 deg.                                                            |                 |
| Limiting indices                  | -11<=h<=12, -12<=k<=12, -34<=l<=35                                            |                 |
| Reflections collected / unique    | 20623 / 5509 [R(int) = 0.0456]                                                |                 |
| Completeness to theta = 30.67     | 95.0 %                                                                        |                 |
| Absorption correction             | Semi-empirical from equivalents                                               |                 |
| Max. and min. transmission        | 0.9639 and 0.8722                                                             |                 |
| Refinement method                 | Full-matrix least-squares on F <sup>2</sup>                                   |                 |
| Data / restraints / parameters    | 5509 / 0 / 248                                                                |                 |
| Goodness-of-fit on F <sup>2</sup> | 1.044                                                                         |                 |
| Final R indices [I>2sigma(I)]     | R1 = 0.0347, wR2 = 0.0816                                                     |                 |
| R indices (all data)              | R1 = 0.0428, wR2 = 0.0852                                                     |                 |
| Absolute structure parameter      | 0.00(4)                                                                       |                 |
| Largest diff. peak and hole       | 0.339 and -0.298 e.Å <sup>-3</sup>                                            |                 |

Table 2. Atomic coordinates ( x 10<sup>4</sup>) and equivalent isotropic displacement parameters (Å<sup>2</sup> x 10<sup>3</sup>) for **3aa**.

U(eq) is defined as one third of the trace of the orthogonalized

Uij tensor.

|       | x        | y        | z       | U(eq) |
|-------|----------|----------|---------|-------|
| Cl(1) | 7593(1)  | 11290(1) | 9785(1) | 29(1) |
| Cl(2) | 7888(1)  | 9024(1)  | 8684(1) | 25(1) |
| O(1)  | 1303(1)  | 10318(1) | 7183(1) | 17(1) |
| O(2)  | 1641(2)  | 8349(1)  | 7748(1) | 24(1) |
| O(3)  | 5338(1)  | 8088(1)  | 7629(1) | 18(1) |
| O(4)  | 4726(1)  | 12173(1) | 8593(1) | 16(1) |
| O(5)  | 4876(2)  | 13397(1) | 9385(1) | 22(1) |
| N(1)  | 3018(2)  | 10445(1) | 7857(1) | 16(1) |
| N(2)  | 4553(2)  | 7331(1)  | 8483(1) | 16(1) |
| C(1)  | -1337(2) | 9279(2)  | 7150(1) | 27(1) |
| C(2)  | 138(2)   | 9582(2)  | 6829(1) | 18(1) |
| C(3)  | 1937(2)  | 9588(2)  | 7602(1) | 17(1) |
| C(4)  | 4011(2)  | 9786(2)  | 8265(1) | 14(1) |
| C(5)  | 3259(2)  | 9363(2)  | 8803(1) | 15(1) |
| C(6)  | 2353(2)  | 10145(2) | 9163(1) | 20(1) |
| C(7)  | 1916(2)  | 9484(2)  | 9652(1) | 26(1) |
| C(8)  | 2399(2)  | 8067(2)  | 9773(1) | 27(1) |
| C(9)  | 6488(2)  | 11274(2) | 9213(1) | 18(1) |
| C(10) | 6576(2)  | 10388(2) | 8783(1) | 16(1) |
| C(11) | 5390(2)  | 10858(2) | 8363(1) | 14(1) |
| C(12) | 844(2)   | 8205(2)  | 6581(1) | 29(1) |
| C(13) | -149(2)  | 10721(2) | 6389(1) | 24(1) |
| C(14) | 3704(2)  | 7924(2)  | 8922(1) | 16(1) |
| C(15) | 3305(2)  | 7257(2)  | 9408(1) | 21(1) |
| C(16) | 5140(2)  | 5836(2)  | 8462(1) | 25(1) |
| C(17) | 4710(2)  | 8299(2)  | 8069(1) | 15(1) |
| C(18) | 5299(2)  | 12397(2) | 9105(1) | 17(1) |

Table 3. Bond lengths [Å] and angles [deg] for **3aa**.

|             |            |
|-------------|------------|
| Cl(1)-C(9)  | 1.6918(16) |
| Cl(2)-C(10) | 1.6952(16) |
| O(1)-C(3)   | 1.3401(19) |
| O(1)-C(2)   | 1.4827(19) |
| O(2)-C(3)   | 1.2153(19) |
| O(3)-C(17)  | 1.221(2)   |
| O(4)-C(18)  | 1.3621(19) |
| O(4)-C(11)  | 1.4451(18) |
| O(5)-C(18)  | 1.201(2)   |
| N(1)-C(3)   | 1.365(2)   |

|                  |            |
|------------------|------------|
| N(1)-C(4)        | 1.444(2)   |
| N(1)-H(1)        | 0.8800     |
| N(2)-C(17)       | 1.355(2)   |
| N(2)-C(14)       | 1.407(2)   |
| N(2)-C(16)       | 1.458(2)   |
| C(1)-C(2)        | 1.512(2)   |
| C(1)-H(1A)       | 0.9800     |
| C(1)-H(1B)       | 0.9800     |
| C(1)-H(1C)       | 0.9800     |
| C(2)-C(13)       | 1.521(2)   |
| C(2)-C(12)       | 1.524(2)   |
| C(4)-C(5)        | 1.518(2)   |
| C(4)-C(11)       | 1.553(2)   |
| C(4)-C(17)       | 1.561(2)   |
| C(5)-C(6)        | 1.376(2)   |
| C(5)-C(14)       | 1.401(2)   |
| C(6)-C(7)        | 1.396(2)   |
| C(6)-H(6)        | 0.9500     |
| C(7)-C(8)        | 1.392(3)   |
| C(7)-H(7)        | 0.9500     |
| C(8)-C(15)       | 1.398(3)   |
| C(8)-H(8)        | 0.9500     |
| C(9)-C(10)       | 1.332(2)   |
| C(9)-C(18)       | 1.469(2)   |
| C(10)-C(11)      | 1.510(2)   |
| C(11)-H(11)      | 1.0000     |
| C(12)-H(12A)     | 0.9800     |
| C(12)-H(12B)     | 0.9800     |
| C(12)-H(12C)     | 0.9800     |
| C(13)-H(13A)     | 0.9800     |
| C(13)-H(13B)     | 0.9800     |
| C(13)-H(13C)     | 0.9800     |
| C(14)-C(15)      | 1.381(2)   |
| C(15)-H(15)      | 0.9500     |
| C(16)-H(16A)     | 0.9800     |
| C(16)-H(16B)     | 0.9800     |
| C(16)-H(16C)     | 0.9800     |
| C(3)-O(1)-C(2)   | 119.61(12) |
| C(18)-O(4)-C(11) | 110.15(12) |
| C(3)-N(1)-C(4)   | 118.51(12) |
| C(3)-N(1)-H(1)   | 120.7      |
| C(4)-N(1)-H(1)   | 120.7      |
| C(17)-N(2)-C(14) | 111.94(13) |
| C(17)-N(2)-C(16) | 123.44(14) |

|                   |            |
|-------------------|------------|
| C(14)-N(2)-C(16)  | 124.56(14) |
| C(2)-C(1)-H(1A)   | 109.5      |
| C(2)-C(1)-H(1B)   | 109.5      |
| H(1A)-C(1)-H(1B)  | 109.5      |
| C(2)-C(1)-H(1C)   | 109.5      |
| H(1A)-C(1)-H(1C)  | 109.5      |
| H(1B)-C(1)-H(1C)  | 109.5      |
| O(1)-C(2)-C(1)    | 109.91(14) |
| O(1)-C(2)-C(13)   | 102.30(12) |
| C(1)-C(2)-C(13)   | 111.12(14) |
| O(1)-C(2)-C(12)   | 110.02(13) |
| C(1)-C(2)-C(12)   | 112.79(16) |
| C(13)-C(2)-C(12)  | 110.21(15) |
| O(2)-C(3)-O(1)    | 127.36(16) |
| O(2)-C(3)-N(1)    | 122.75(15) |
| O(1)-C(3)-N(1)    | 109.89(13) |
| N(1)-C(4)-C(5)    | 117.33(14) |
| N(1)-C(4)-C(11)   | 106.88(12) |
| C(5)-C(4)-C(11)   | 110.44(13) |
| N(1)-C(4)-C(17)   | 112.03(13) |
| C(5)-C(4)-C(17)   | 102.01(12) |
| C(11)-C(4)-C(17)  | 107.84(12) |
| C(6)-C(5)-C(14)   | 120.49(15) |
| C(6)-C(5)-C(4)    | 131.61(14) |
| C(14)-C(5)-C(4)   | 107.83(14) |
| C(5)-C(6)-C(7)    | 118.55(15) |
| C(5)-C(6)-H(6)    | 120.7      |
| C(7)-C(6)-H(6)    | 120.7      |
| C(8)-C(7)-C(6)    | 120.44(17) |
| C(8)-C(7)-H(7)    | 119.8      |
| C(6)-C(7)-H(7)    | 119.8      |
| C(7)-C(8)-C(15)   | 121.45(17) |
| C(7)-C(8)-H(8)    | 119.3      |
| C(15)-C(8)-H(8)   | 119.3      |
| C(10)-C(9)-C(18)  | 108.74(14) |
| C(10)-C(9)-Cl(1)  | 129.02(13) |
| C(18)-C(9)-Cl(1)  | 122.08(12) |
| C(9)-C(10)-C(11)  | 109.22(14) |
| C(9)-C(10)-Cl(2)  | 126.77(13) |
| C(11)-C(10)-Cl(2) | 123.84(12) |
| O(4)-C(11)-C(10)  | 103.50(12) |
| O(4)-C(11)-C(4)   | 106.67(12) |
| C(10)-C(11)-C(4)  | 115.86(12) |
| O(4)-C(11)-H(11)  | 110.2      |

|                     |            |
|---------------------|------------|
| C(10)-C(11)-H(11)   | 110.2      |
| C(4)-C(11)-H(11)    | 110.2      |
| C(2)-C(12)-H(12A)   | 109.5      |
| C(2)-C(12)-H(12B)   | 109.5      |
| H(12A)-C(12)-H(12B) | 109.5      |
| C(2)-C(12)-H(12C)   | 109.5      |
| H(12A)-C(12)-H(12C) | 109.5      |
| H(12B)-C(12)-H(12C) | 109.5      |
| C(2)-C(13)-H(13A)   | 109.5      |
| C(2)-C(13)-H(13B)   | 109.5      |
| H(13A)-C(13)-H(13B) | 109.5      |
| C(2)-C(13)-H(13C)   | 109.5      |
| H(13A)-C(13)-H(13C) | 109.5      |
| H(13B)-C(13)-H(13C) | 109.5      |
| C(15)-C(14)-C(5)    | 121.88(16) |
| C(15)-C(14)-N(2)    | 128.13(15) |
| C(5)-C(14)-N(2)     | 109.99(14) |
| C(14)-C(15)-C(8)    | 117.15(16) |
| C(14)-C(15)-H(15)   | 121.4      |
| C(8)-C(15)-H(15)    | 121.4      |
| N(2)-C(16)-H(16A)   | 109.5      |
| N(2)-C(16)-H(16B)   | 109.5      |
| H(16A)-C(16)-H(16B) | 109.5      |
| N(2)-C(16)-H(16C)   | 109.5      |
| H(16A)-C(16)-H(16C) | 109.5      |
| H(16B)-C(16)-H(16C) | 109.5      |
| O(3)-C(17)-N(2)     | 127.09(14) |
| O(3)-C(17)-C(4)     | 125.39(13) |
| N(2)-C(17)-C(4)     | 107.45(13) |
| O(5)-C(18)-O(4)     | 122.29(15) |
| O(5)-C(18)-C(9)     | 129.57(16) |
| O(4)-C(18)-C(9)     | 108.10(13) |

---

Symmetry transformations used to generate equivalent atoms:

Table 4. Anisotropic displacement parameters ( $\text{\AA}^2 \times 10^3$ ) for **3aa**.

The anisotropic displacement factor exponent takes the form:  $-2 \pi^2 [h^2 a^{*2} U_{11} + \dots + 2 h k a^* b^* U_{12}]$

---

|       | U11   | U22   | U33   | U23   | U13    | U12   |
|-------|-------|-------|-------|-------|--------|-------|
| Cl(1) | 38(1) | 28(1) | 21(1) | -1(1) | -14(1) | 1(1)  |
| Cl(2) | 21(1) | 22(1) | 30(1) | -3(1) | -5(1)  | 7(1)  |
| O(1)  | 18(1) | 15(1) | 19(1) | 2(1)  | -5(1)  | -2(1) |
| O(2)  | 26(1) | 18(1) | 28(1) | 7(1)  | -8(1)  | -6(1) |

---

|       |       |       |       |       |       |       |
|-------|-------|-------|-------|-------|-------|-------|
| O(3)  | 23(1) | 16(1) | 15(1) | -2(1) | 2(1)  | 0(1)  |
| O(4)  | 20(1) | 11(1) | 16(1) | -1(1) | -2(1) | 1(1)  |
| O(5)  | 30(1) | 17(1) | 19(1) | -3(1) | 5(1)  | -2(1) |
| N(1)  | 20(1) | 12(1) | 18(1) | 2(1)  | -4(1) | -1(1) |
| N(2)  | 21(1) | 12(1) | 16(1) | 2(1)  | 1(1)  | 2(1)  |
| C(1)  | 17(1) | 34(1) | 31(1) | 2(1)  | 0(1)  | -4(1) |
| C(2)  | 16(1) | 18(1) | 20(1) | -3(1) | -4(1) | 0(1)  |
| C(3)  | 16(1) | 16(1) | 19(1) | 2(1)  | 0(1)  | -1(1) |
| C(4)  | 16(1) | 12(1) | 15(1) | 1(1)  | 0(1)  | 0(1)  |
| C(5)  | 14(1) | 16(1) | 14(1) | 1(1)  | 0(1)  | -1(1) |
| C(6)  | 20(1) | 18(1) | 23(1) | -1(1) | 2(1)  | 2(1)  |
| C(7)  | 27(1) | 31(1) | 22(1) | -4(1) | 10(1) | 1(1)  |
| C(8)  | 33(1) | 30(1) | 18(1) | 4(1)  | 6(1)  | -2(1) |
| C(9)  | 21(1) | 17(1) | 15(1) | 2(1)  | -5(1) | -2(1) |
| C(10) | 16(1) | 14(1) | 19(1) | 2(1)  | -2(1) | 0(1)  |
| C(11) | 16(1) | 12(1) | 15(1) | 0(1)  | -2(1) | 0(1)  |
| C(12) | 30(1) | 23(1) | 33(1) | -8(1) | -4(1) | 5(1)  |
| C(13) | 24(1) | 26(1) | 23(1) | -1(1) | -7(1) | 0(1)  |
| C(14) | 15(1) | 17(1) | 15(1) | 0(1)  | 0(1)  | -1(1) |
| C(15) | 23(1) | 20(1) | 20(1) | 5(1)  | 0(1)  | -1(1) |
| C(16) | 34(1) | 15(1) | 28(1) | 3(1)  | 5(1)  | 8(1)  |
| C(17) | 16(1) | 13(1) | 16(1) | 1(1)  | -2(1) | 0(1)  |
| C(18) | 21(1) | 14(1) | 15(1) | 2(1)  | 1(1)  | -4(1) |

Table 5. Hydrogen coordinates ( $\times 10^4$ ) and isotropic displacement parameters ( $\text{\AA}^2 \times 10^3$ ) for **3aa**.

|        | x     | y     | z     | U(eq) |
|--------|-------|-------|-------|-------|
| H(1)   | 3108  | 11378 | 7775  | 20    |
| H(1A)  | -1716 | 10190 | 7314  | 41    |
| H(1B)  | -1114 | 8567  | 7438  | 41    |
| H(1C)  | -2139 | 8885  | 6905  | 41    |
| H(6)   | 2032  | 11115 | 9080  | 25    |
| H(7)   | 1284  | 10004 | 9905  | 32    |
| H(8)   | 2106  | 7641  | 10111 | 32    |
| H(11)  | 5923  | 11086 | 8010  | 17    |
| H(12A) | 1008  | 7475  | 6868  | 43    |
| H(12B) | 1847  | 8445  | 6410  | 43    |
| H(12C) | 130   | 7811  | 6305  | 43    |
| H(13A) | 826   | 10903 | 6190  | 37    |
| H(13B) | -510  | 11632 | 6557  | 37    |
| H(13C) | -946  | 10361 | 6135  | 37    |
| H(15)  | 3633  | 6289  | 9490  | 25    |

|        |      |      |      |    |
|--------|------|------|------|----|
| H(16A) | 6169 | 5791 | 8636 | 38 |
| H(16B) | 5231 | 5527 | 8080 | 38 |
| H(16C) | 4415 | 5186 | 8653 | 38 |

Table 6. Torsion angles [deg] for **3aa**.

|                        |             |
|------------------------|-------------|
| C(3)-O(1)-C(2)-C(1)    | 66.94(18)   |
| C(3)-O(1)-C(2)-C(13)   | -174.95(14) |
| C(3)-O(1)-C(2)-C(12)   | -57.84(19)  |
| C(2)-O(1)-C(3)-O(2)    | -2.2(3)     |
| C(2)-O(1)-C(3)-N(1)    | 177.56(13)  |
| C(4)-N(1)-C(3)-O(2)    | 9.4(2)      |
| C(4)-N(1)-C(3)-O(1)    | -170.38(14) |
| C(3)-N(1)-C(4)-C(5)    | -71.05(19)  |
| C(3)-N(1)-C(4)-C(11)   | 164.36(14)  |
| C(3)-N(1)-C(4)-C(17)   | 46.44(19)   |
| N(1)-C(4)-C(5)-C(6)    | -52.0(2)    |
| C(11)-C(4)-C(5)-C(6)   | 70.8(2)     |
| C(17)-C(4)-C(5)-C(6)   | -174.80(17) |
| N(1)-C(4)-C(5)-C(14)   | 131.09(14)  |
| C(11)-C(4)-C(5)-C(14)  | -106.13(14) |
| C(17)-C(4)-C(5)-C(14)  | 8.30(16)    |
| C(14)-C(5)-C(6)-C(7)   | 1.3(3)      |
| C(4)-C(5)-C(6)-C(7)    | -175.29(17) |
| C(5)-C(6)-C(7)-C(8)    | 0.4(3)      |
| C(6)-C(7)-C(8)-C(15)   | -1.2(3)     |
| C(18)-C(9)-C(10)-C(11) | -1.65(19)   |
| Cl(1)-C(9)-C(10)-C(11) | -177.10(13) |
| C(18)-C(9)-C(10)-Cl(2) | 173.72(12)  |
| Cl(1)-C(9)-C(10)-Cl(2) | -1.7(3)     |
| C(18)-O(4)-C(11)-C(10) | -5.46(16)   |
| C(18)-O(4)-C(11)-C(4)  | 117.23(13)  |
| C(9)-C(10)-C(11)-O(4)  | 4.29(17)    |
| Cl(2)-C(10)-C(11)-O(4) | -171.25(11) |
| C(9)-C(10)-C(11)-C(4)  | -112.09(16) |
| Cl(2)-C(10)-C(11)-C(4) | 72.38(18)   |
| N(1)-C(4)-C(11)-O(4)   | 64.80(15)   |
| C(5)-C(4)-C(11)-O(4)   | -63.88(15)  |
| C(17)-C(4)-C(11)-O(4)  | -174.57(11) |
| N(1)-C(4)-C(11)-C(10)  | 179.38(13)  |
| C(5)-C(4)-C(11)-C(10)  | 50.70(18)   |
| C(17)-C(4)-C(11)-C(10) | -59.99(17)  |
| C(6)-C(5)-C(14)-C(15)  | -2.4(2)     |
| C(4)-C(5)-C(14)-C(15)  | 174.92(15)  |

|                        |             |
|------------------------|-------------|
| C(6)-C(5)-C(14)-N(2)   | 177.05(15)  |
| C(4)-C(5)-C(14)-N(2)   | -5.64(18)   |
| C(17)-N(2)-C(14)-C(15) | 179.33(17)  |
| C(16)-N(2)-C(14)-C(15) | 2.0(3)      |
| C(17)-N(2)-C(14)-C(5)  | -0.07(19)   |
| C(16)-N(2)-C(14)-C(5)  | -177.43(16) |
| C(5)-C(14)-C(15)-C(8)  | 1.6(3)      |
| N(2)-C(14)-C(15)-C(8)  | -177.69(17) |
| C(7)-C(8)-C(15)-C(14)  | 0.1(3)      |
| C(14)-N(2)-C(17)-O(3)  | -177.38(16) |
| C(16)-N(2)-C(17)-O(3)  | 0.0(3)      |
| C(14)-N(2)-C(17)-C(4)  | 5.57(18)    |
| C(16)-N(2)-C(17)-C(4)  | -177.03(15) |
| N(1)-C(4)-C(17)-O(3)   | 48.2(2)     |
| C(5)-C(4)-C(17)-O(3)   | 174.52(16)  |
| C(11)-C(4)-C(17)-O(3)  | -69.2(2)    |
| N(1)-C(4)-C(17)-N(2)   | -134.70(14) |
| C(5)-C(4)-C(17)-N(2)   | -8.37(16)   |
| C(11)-C(4)-C(17)-N(2)  | 107.96(14)  |
| C(11)-O(4)-C(18)-O(5)  | -177.43(15) |
| C(11)-O(4)-C(18)-C(9)  | 4.71(17)    |
| C(10)-C(9)-C(18)-O(5)  | -179.50(17) |
| Cl(1)-C(9)-C(18)-O(5)  | -3.7(3)     |
| C(10)-C(9)-C(18)-O(4)  | -1.84(19)   |
| Cl(1)-C(9)-C(18)-O(4)  | 173.99(12)  |

---

Symmetry transformations used to generate equivalent atoms:

Table 7. Hydrogen bonds for **3aa** [A and deg.].

---

| D-H...A            | d(D-H) | d(H...A) | d(D...A)   | <(DHA) |
|--------------------|--------|----------|------------|--------|
| N(1)-H(1)...O(3)#1 | 0.88   | 2.28     | 3.0401(18) | 144.6  |

---

Symmetry transformations used to generate equivalent atoms:

#1 -x+1,y+1/2,-z+3/2



# NMR Spectra of Products

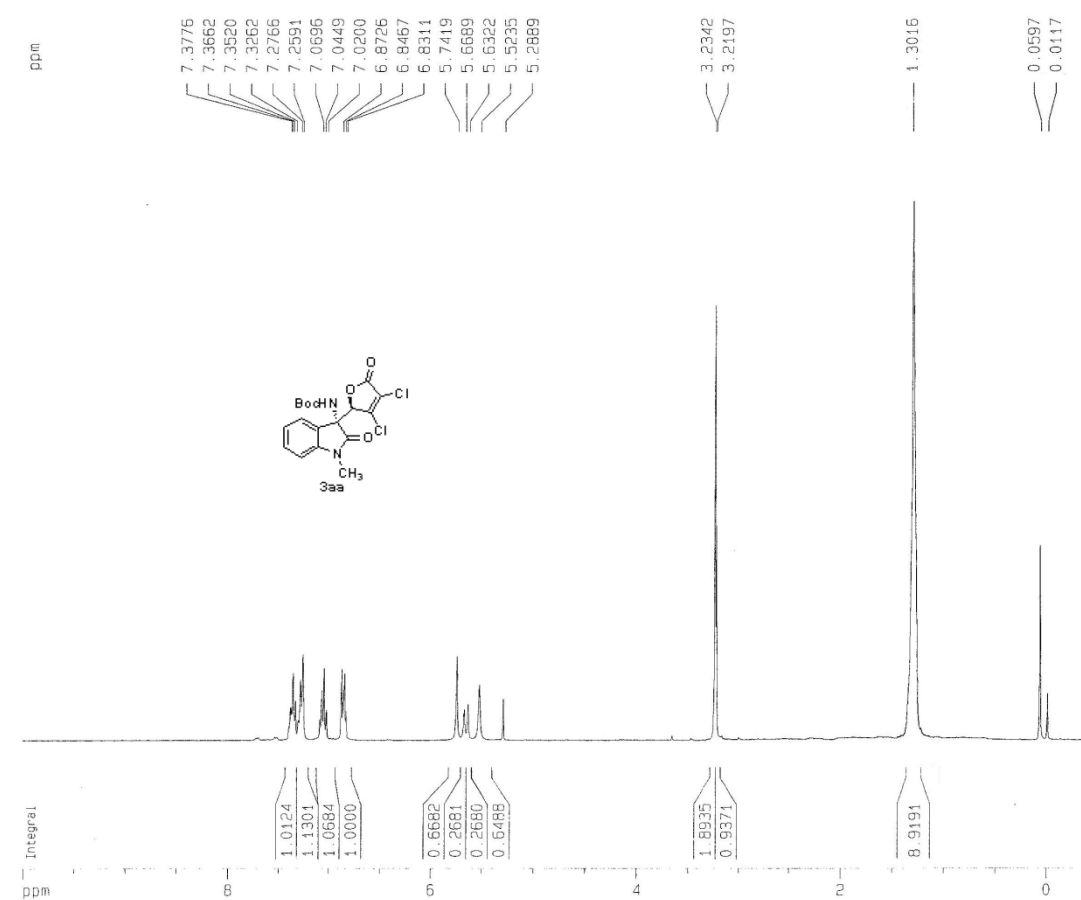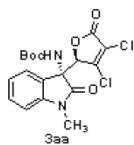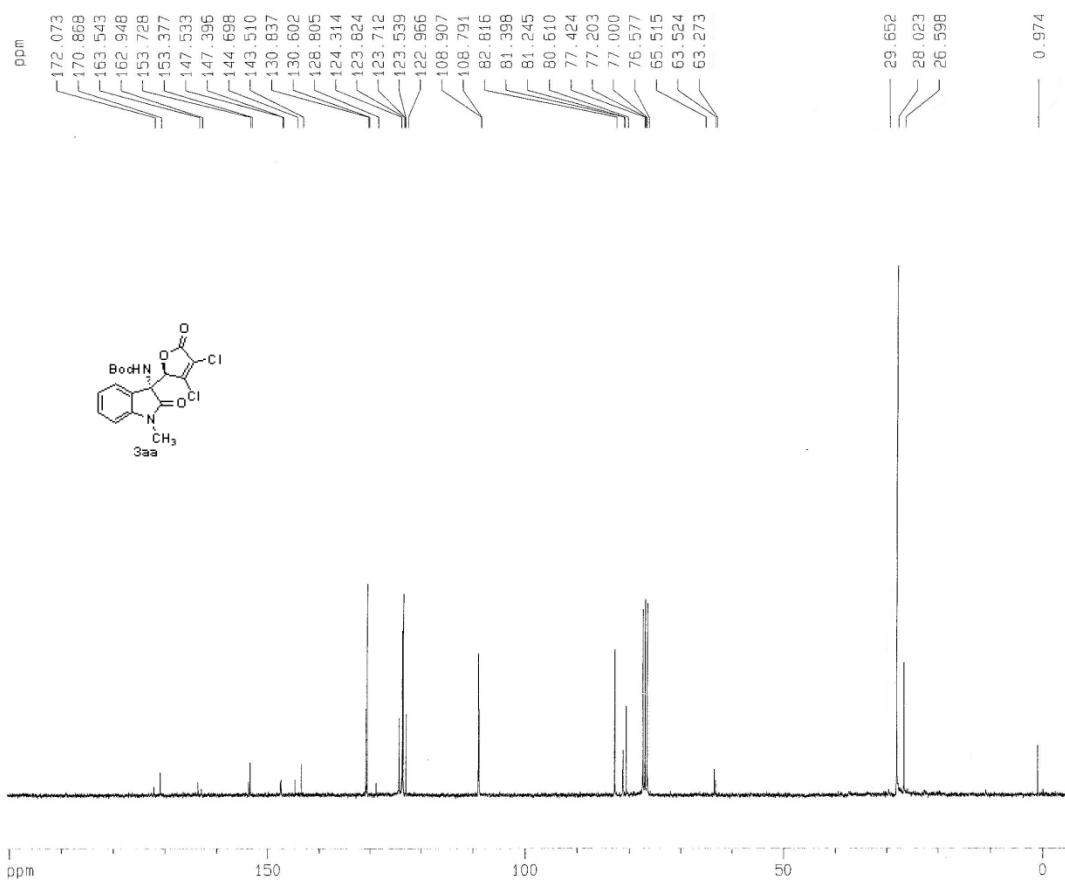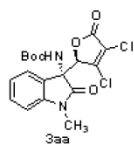

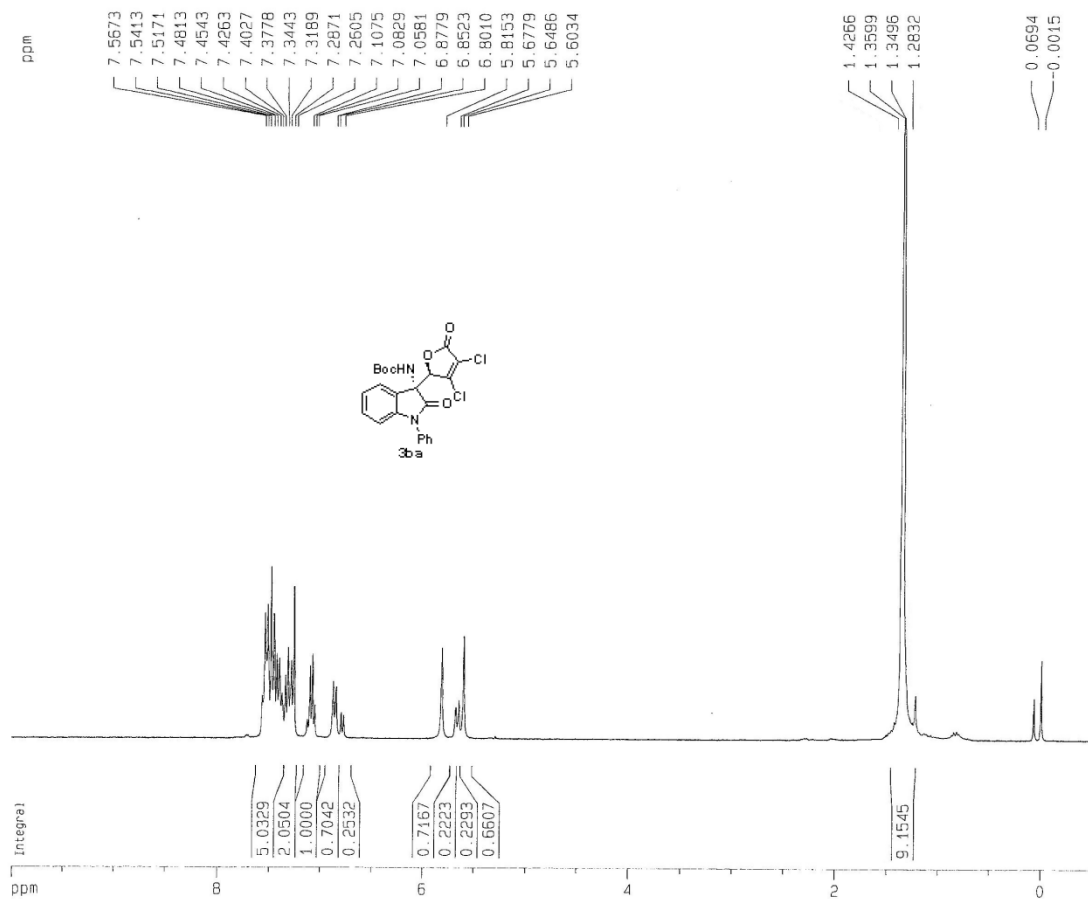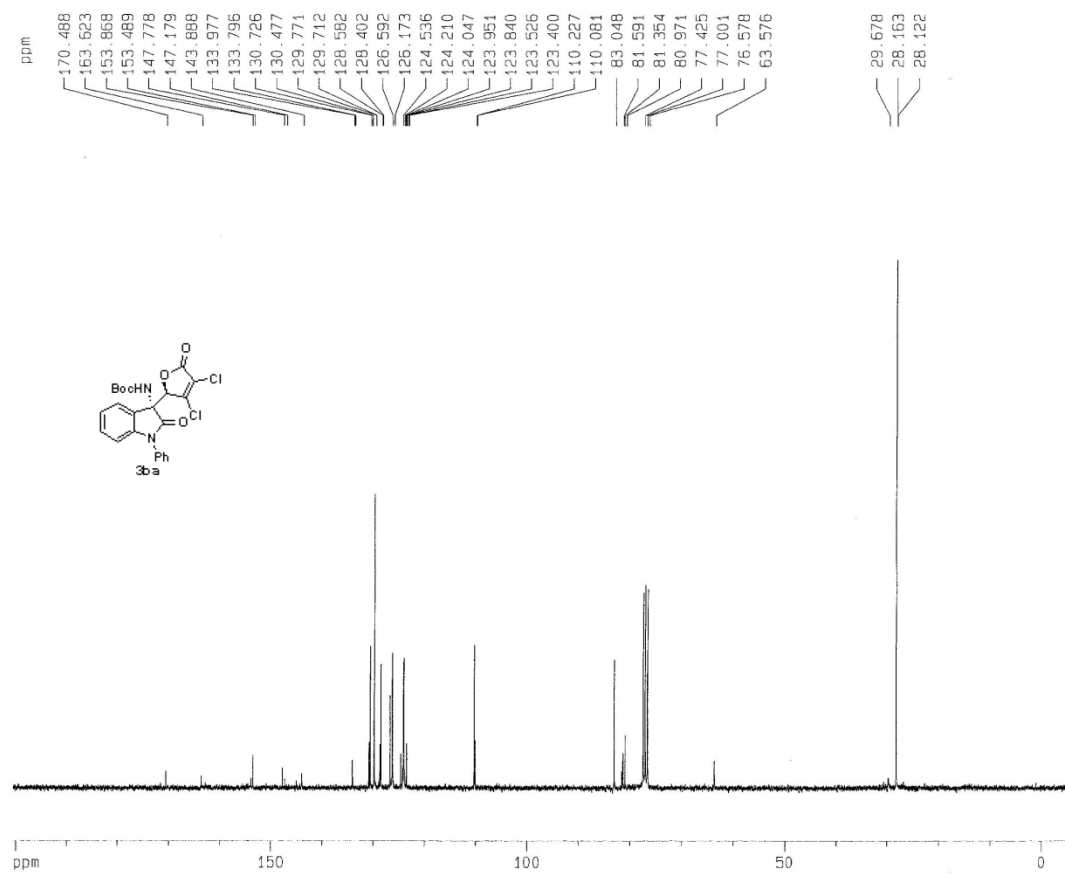



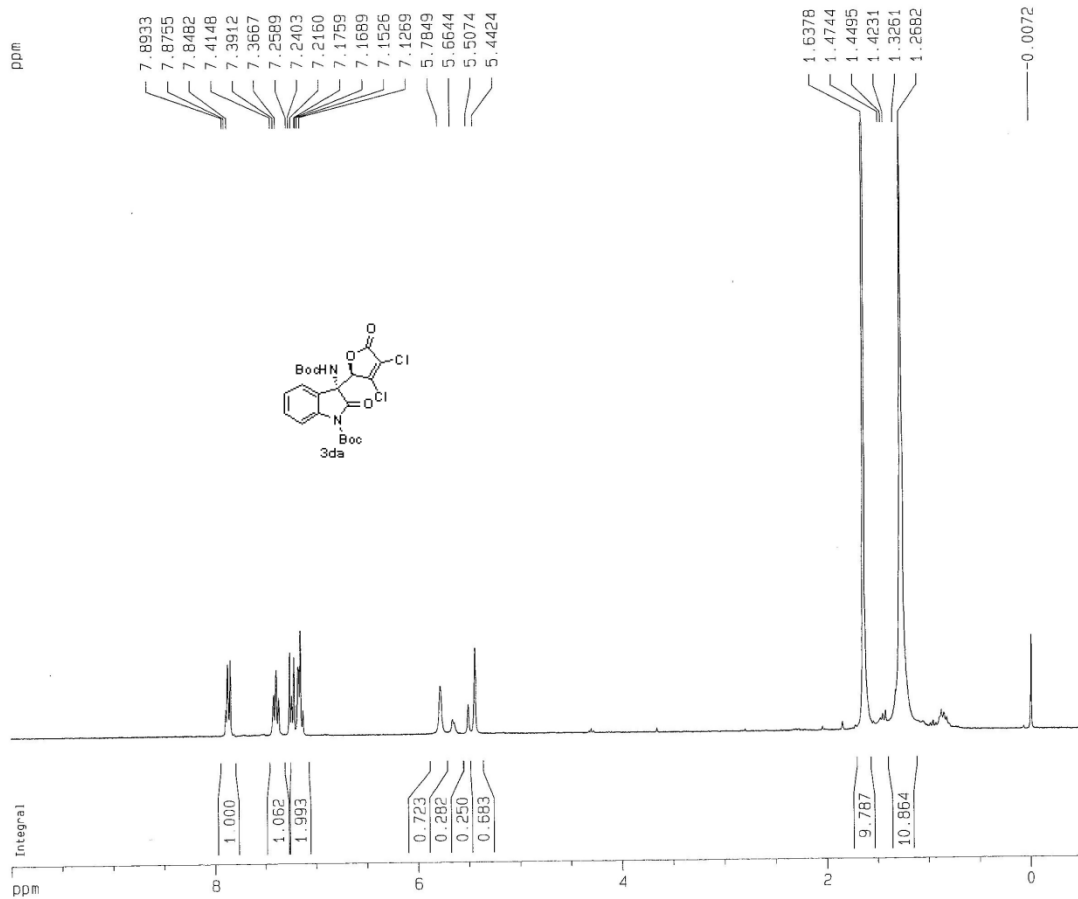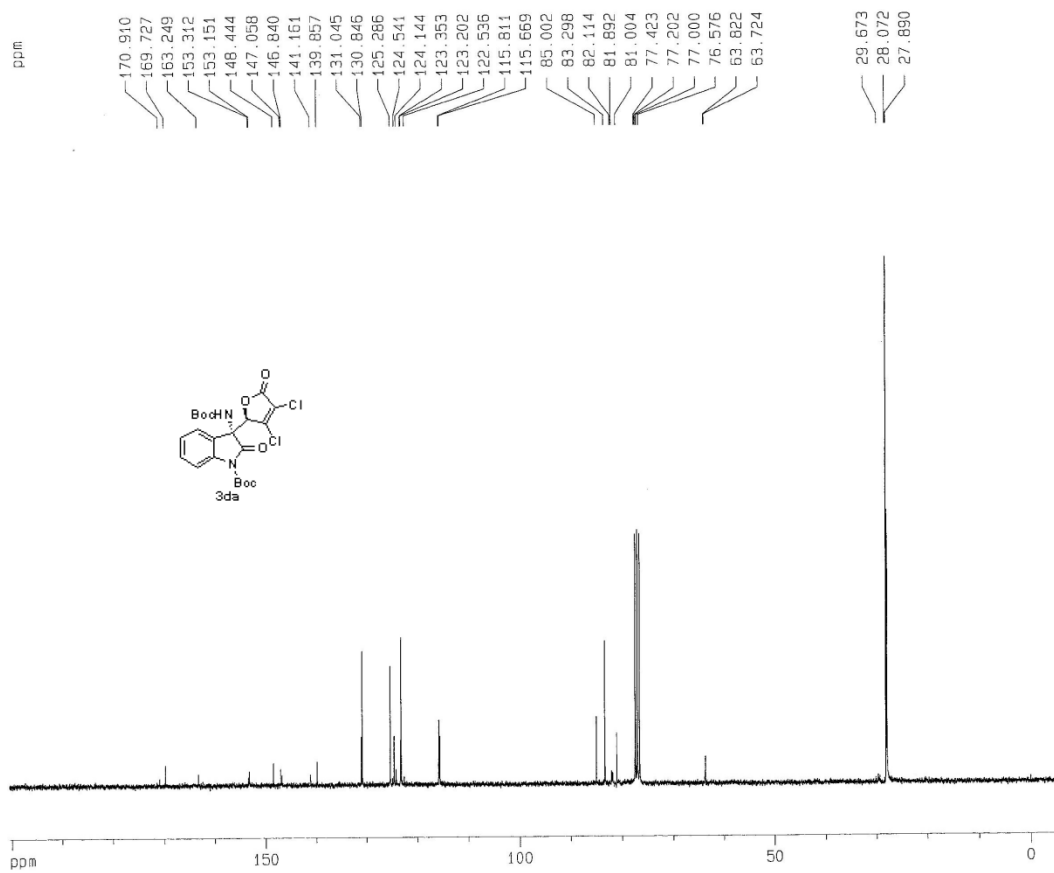

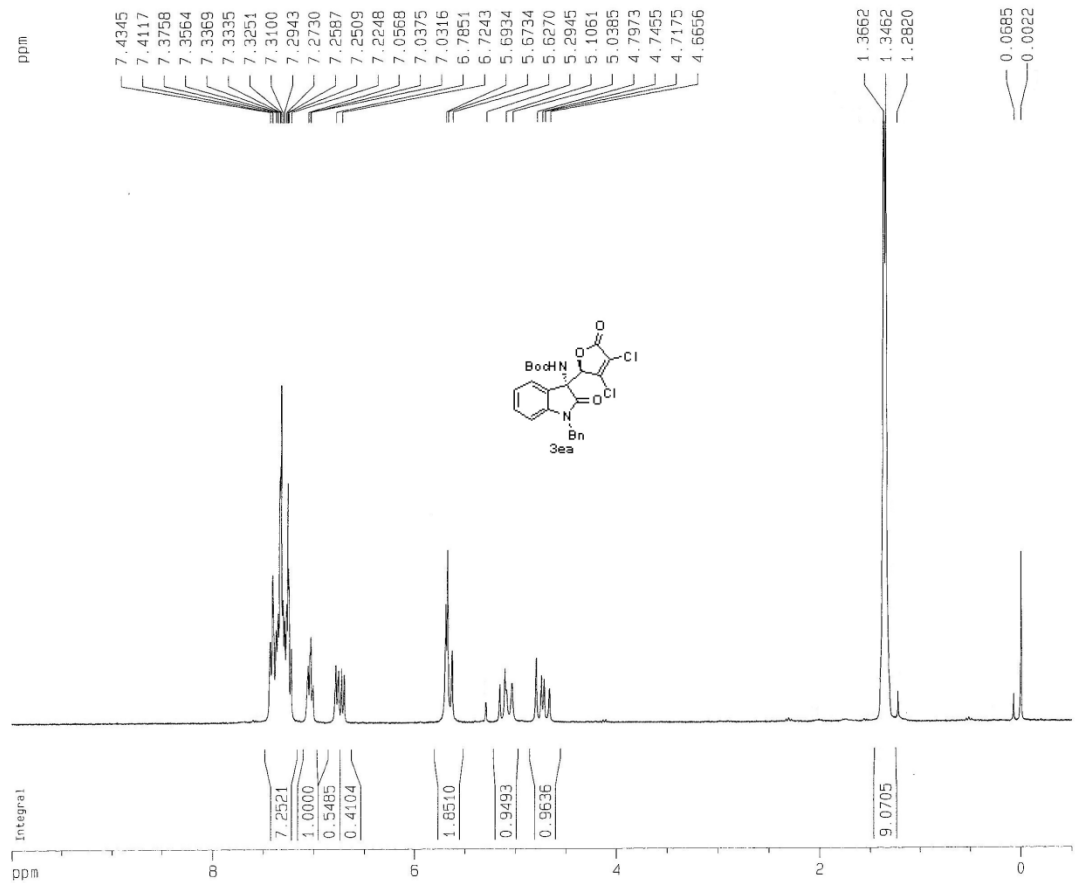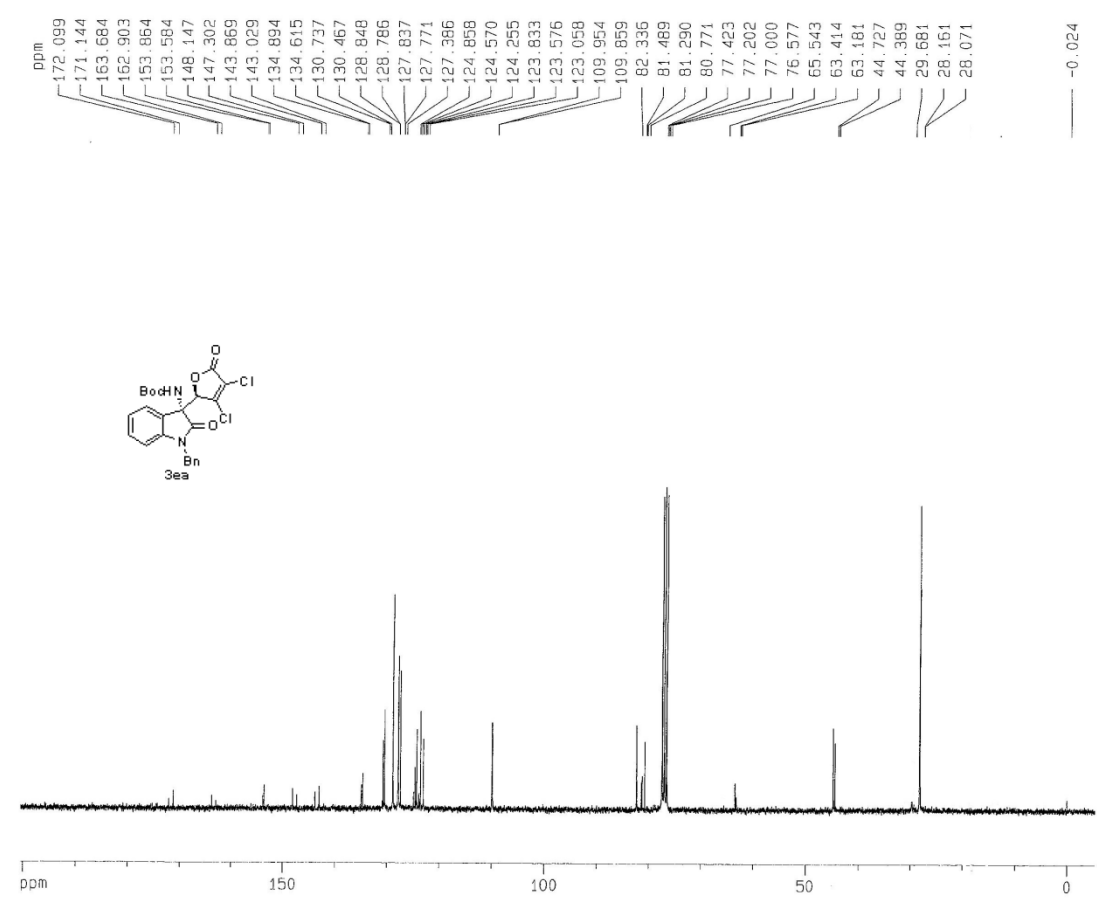

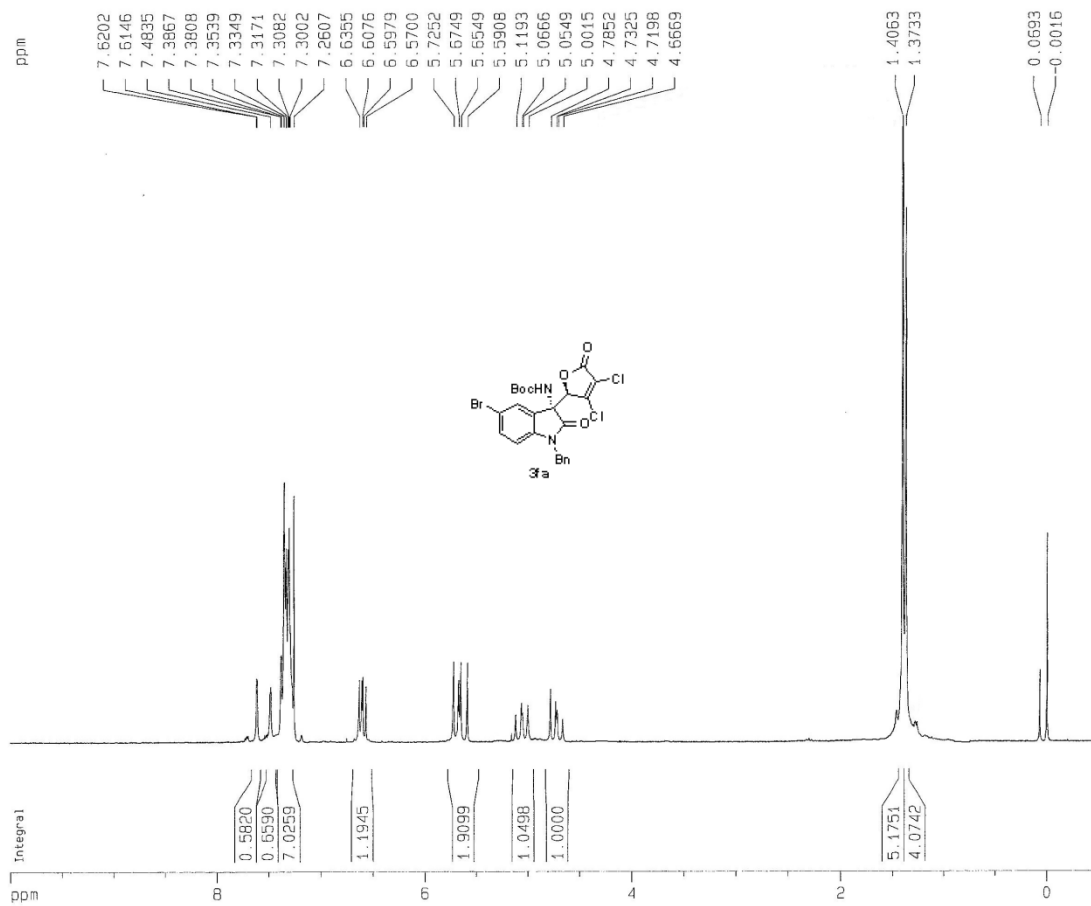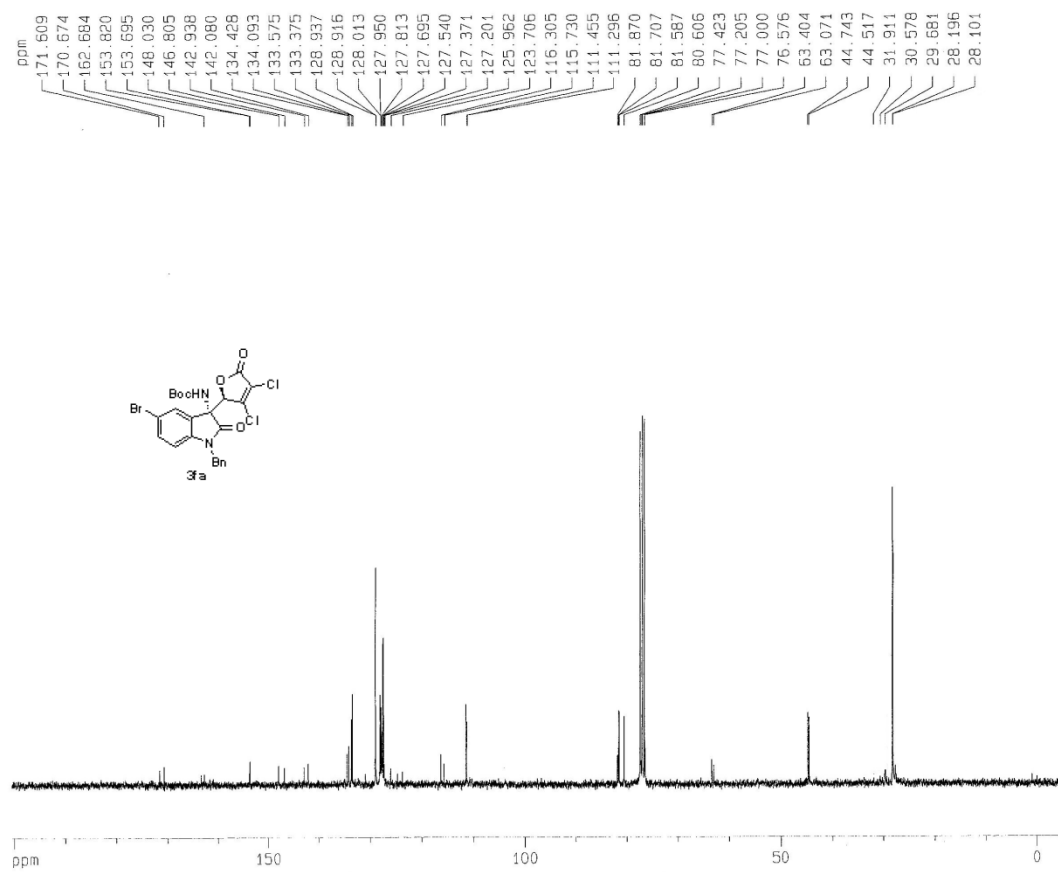

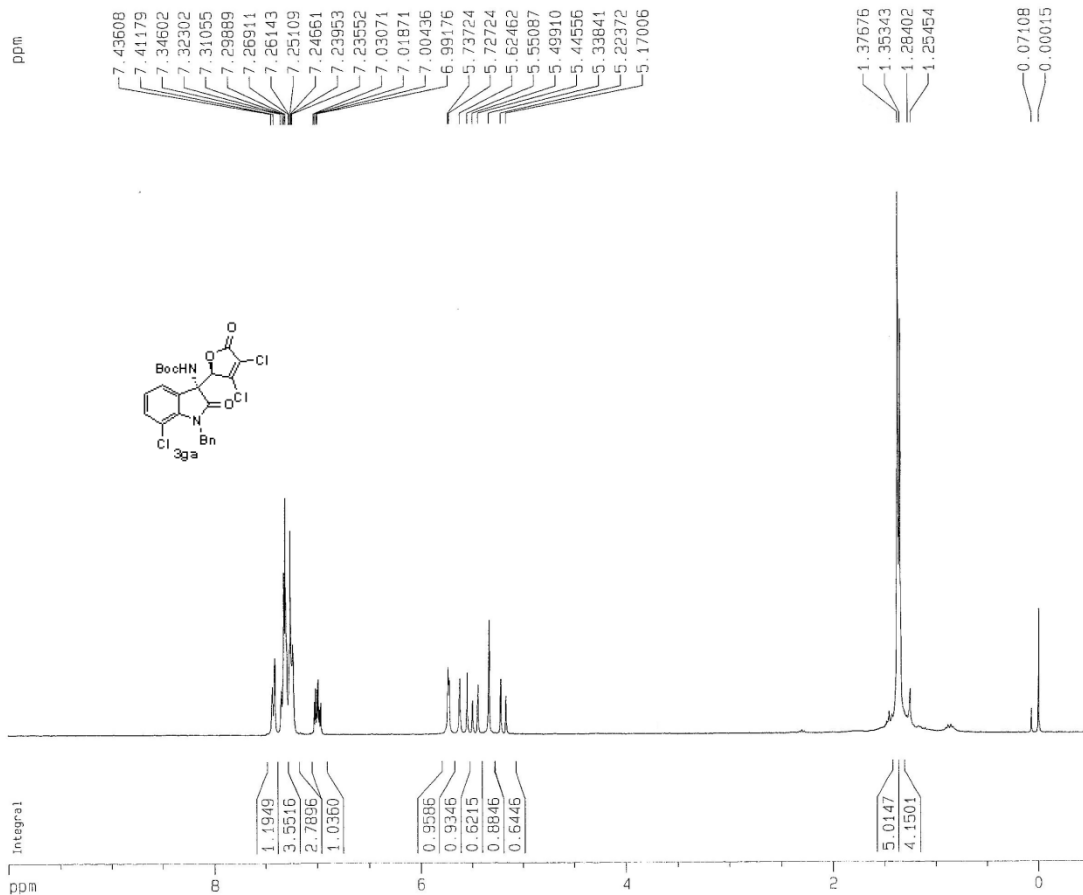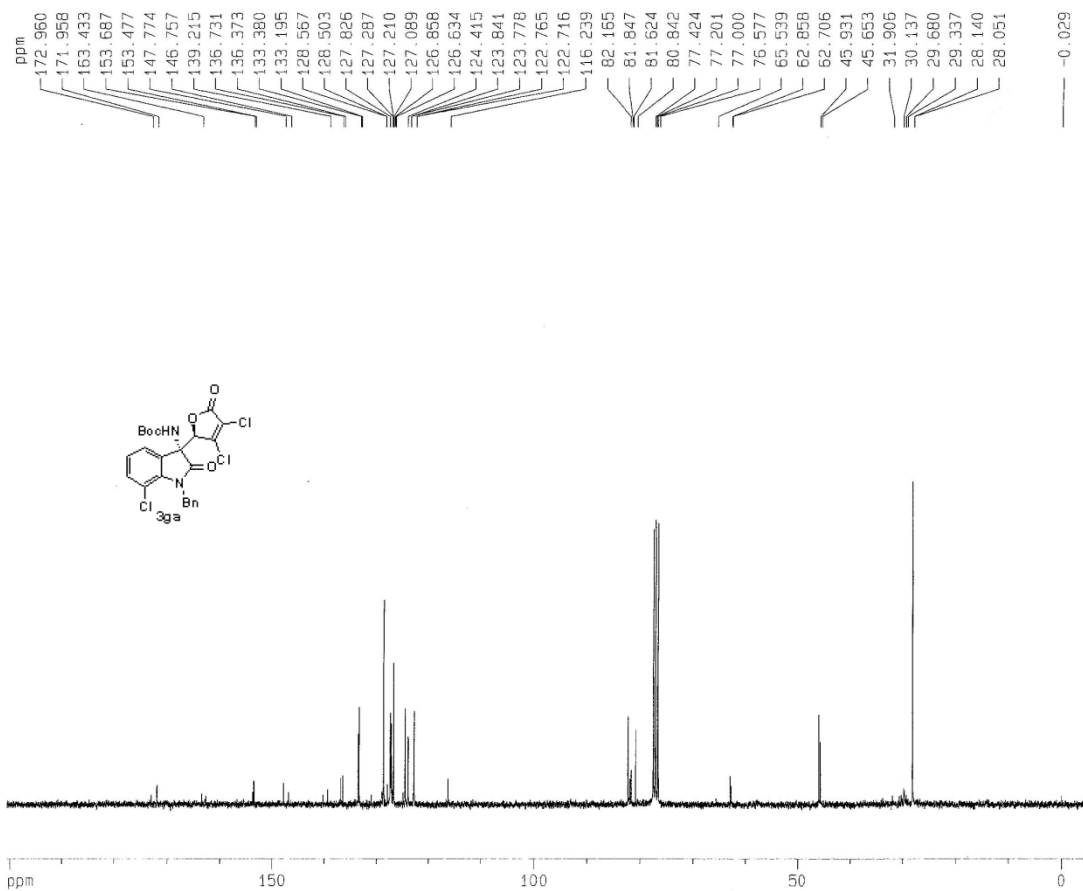

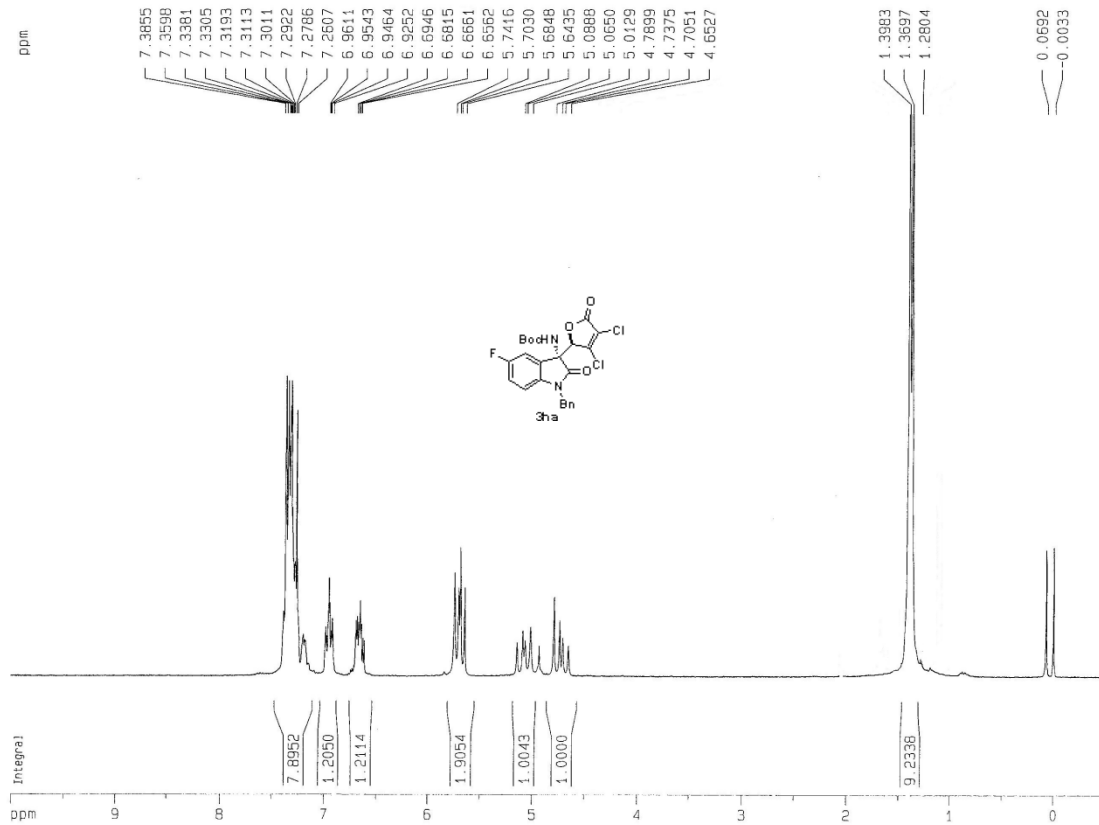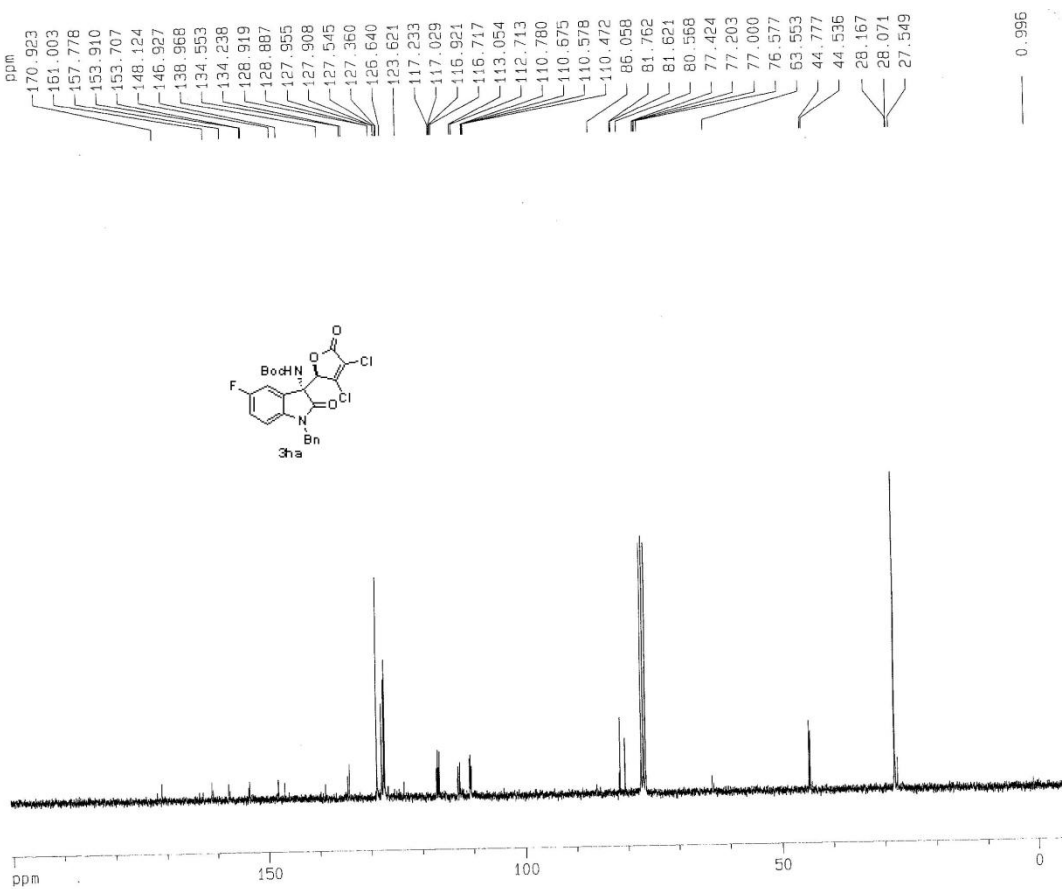



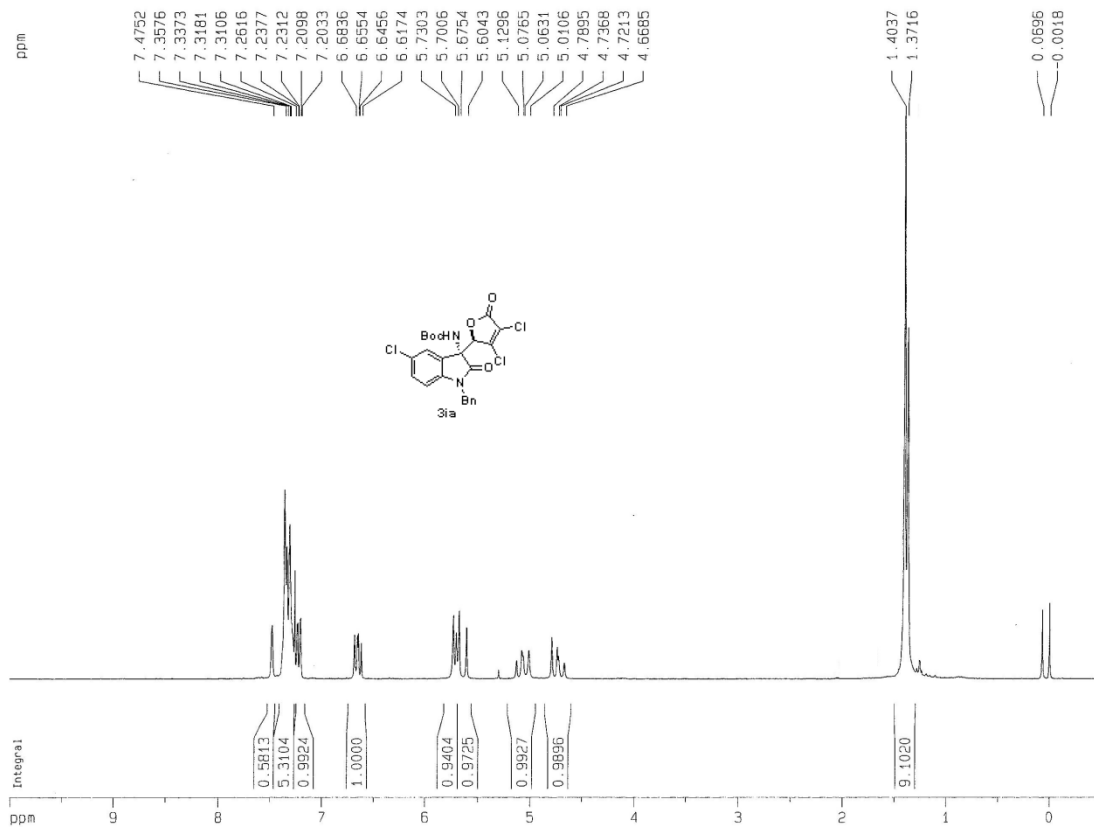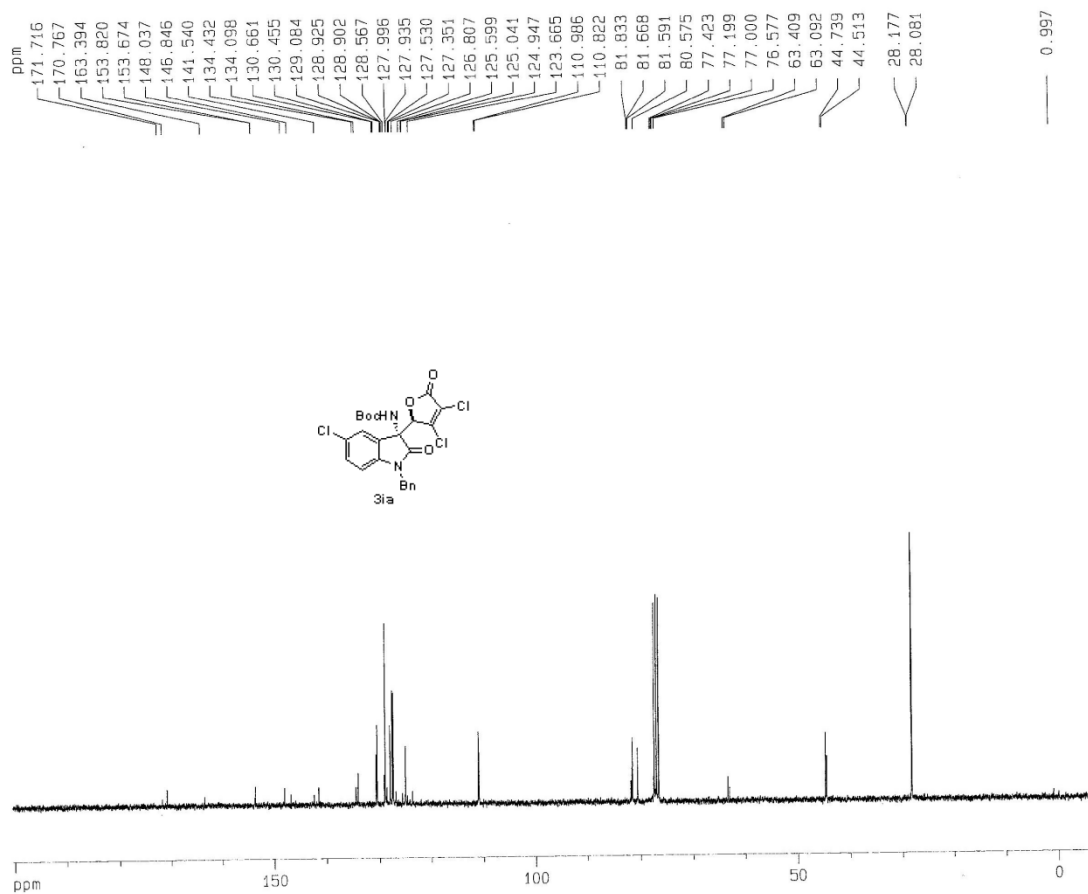



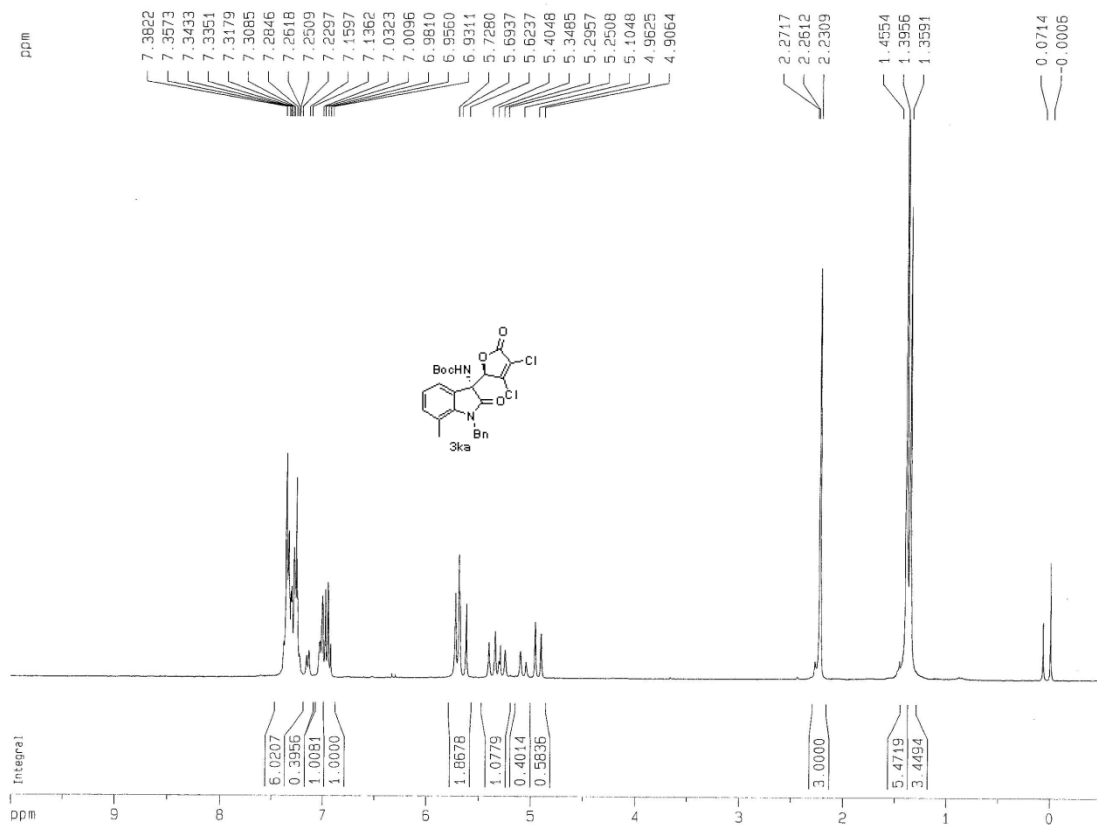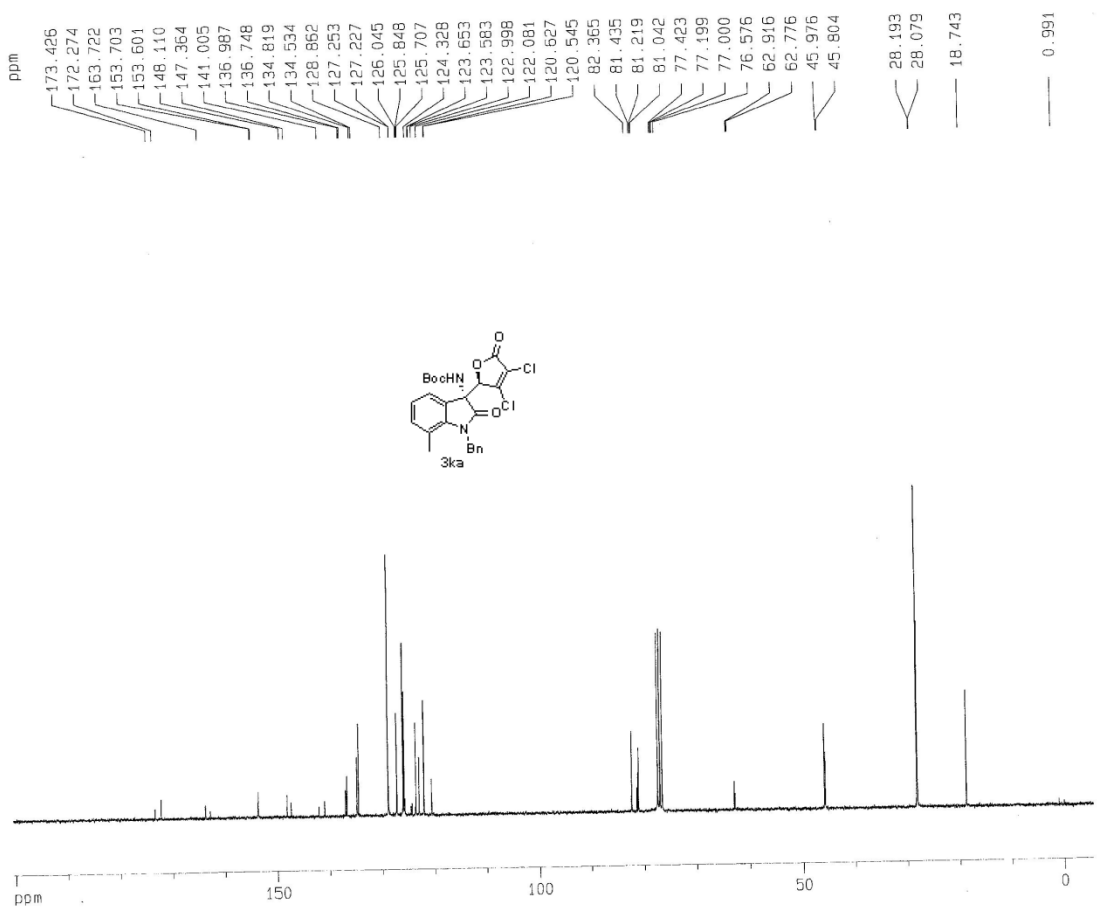

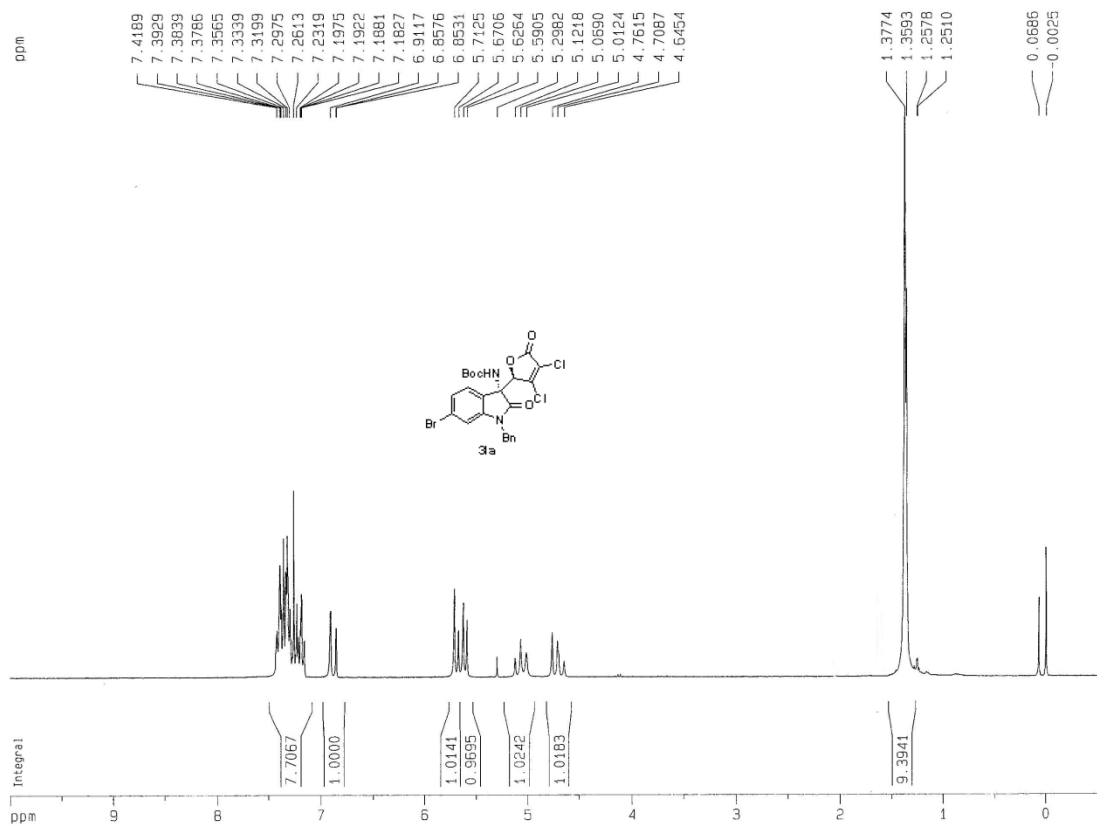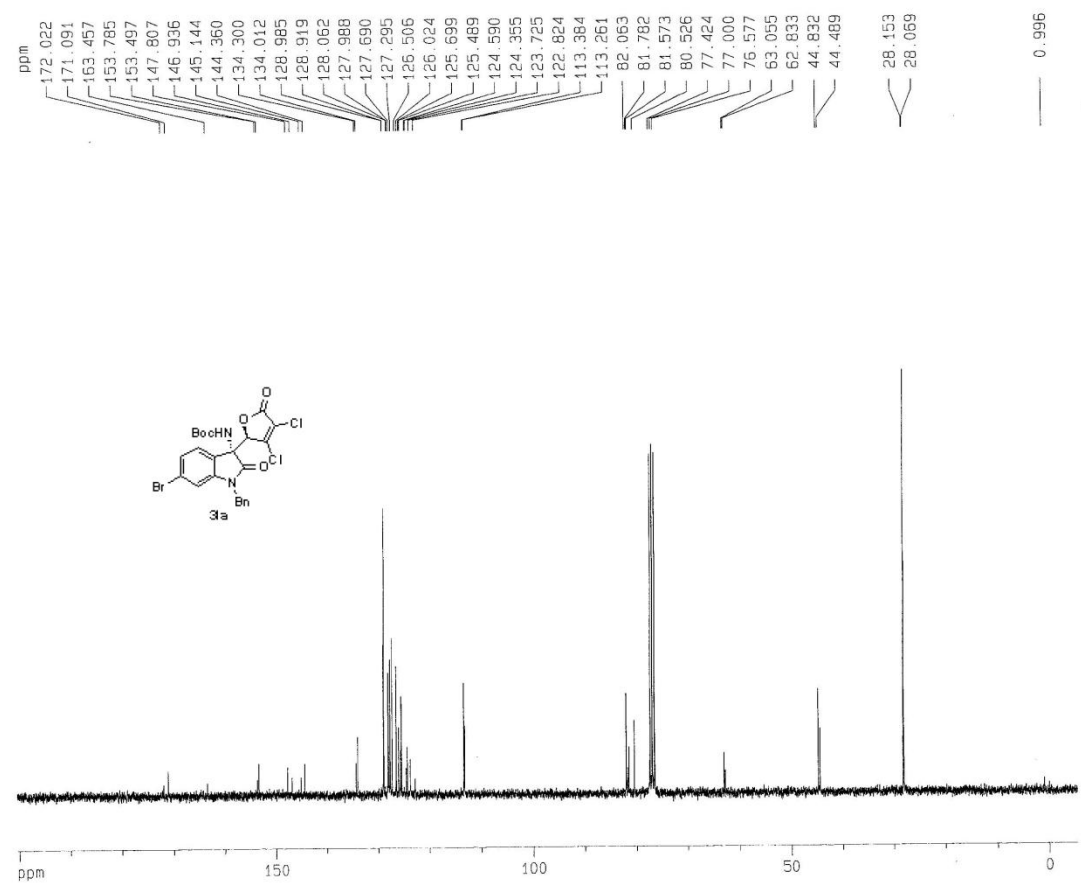

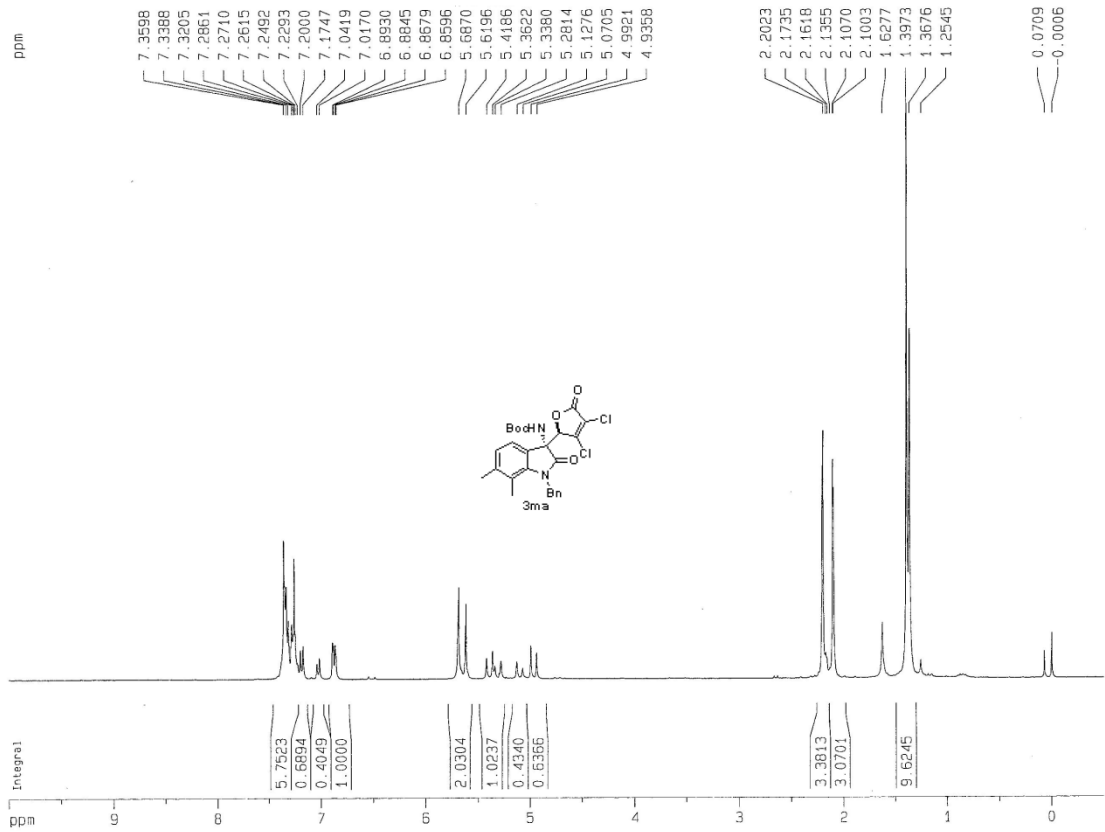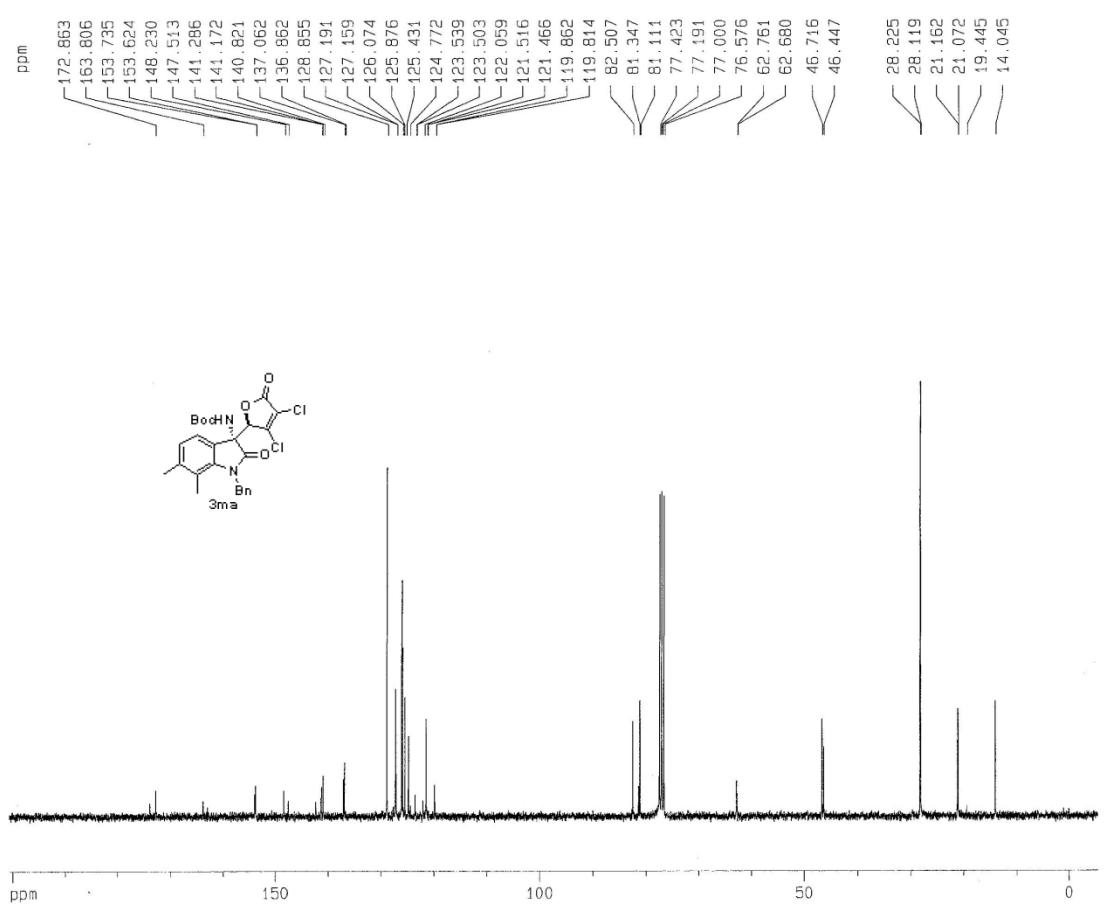

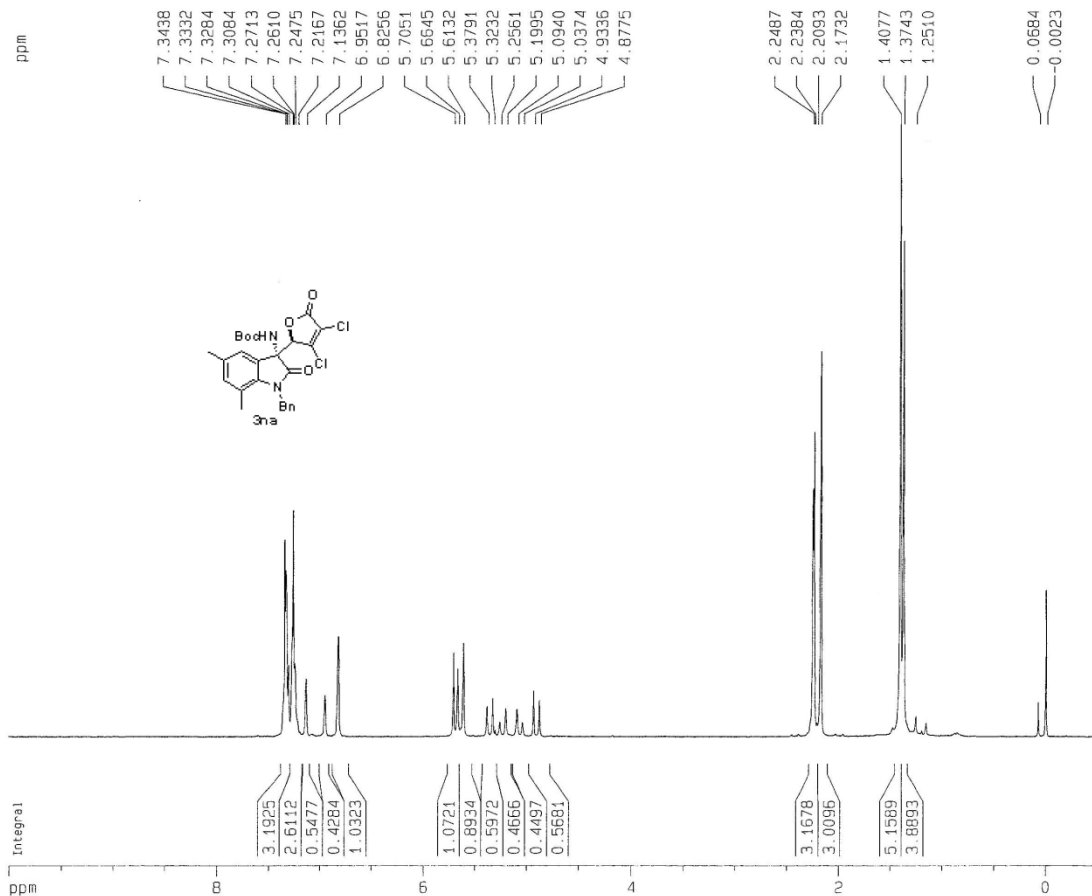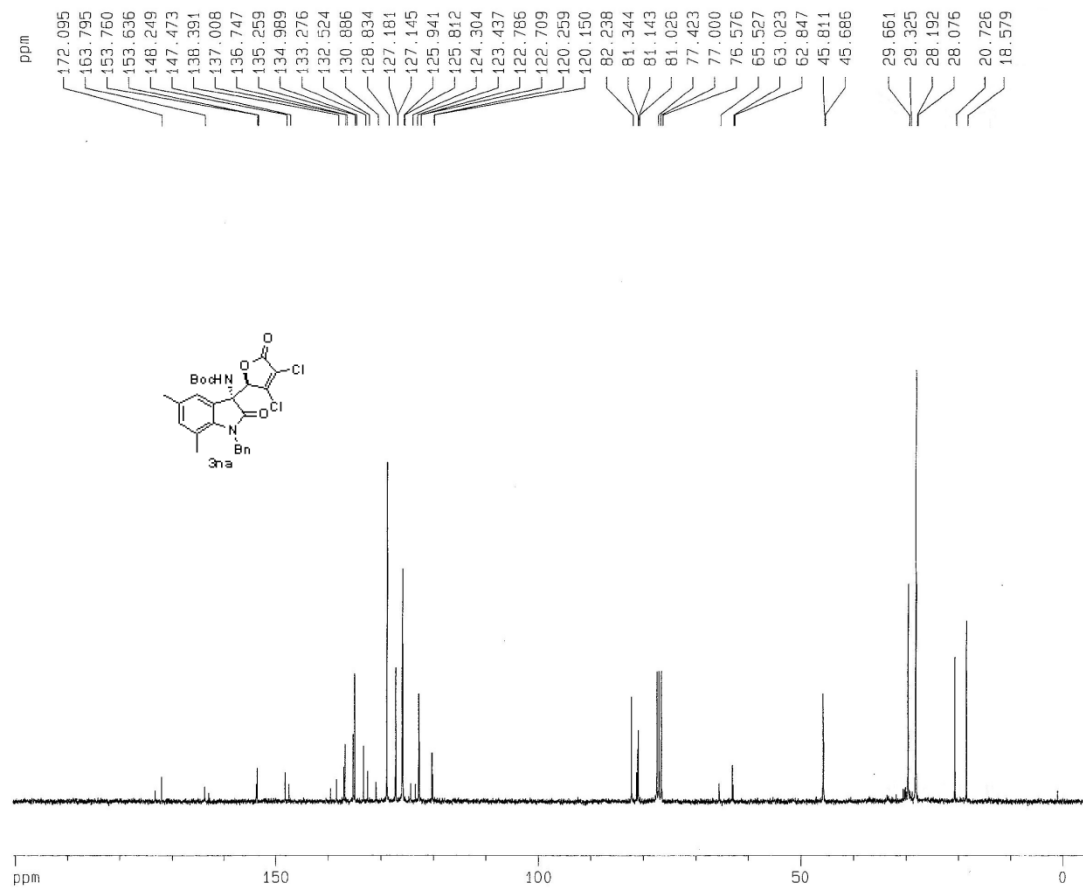

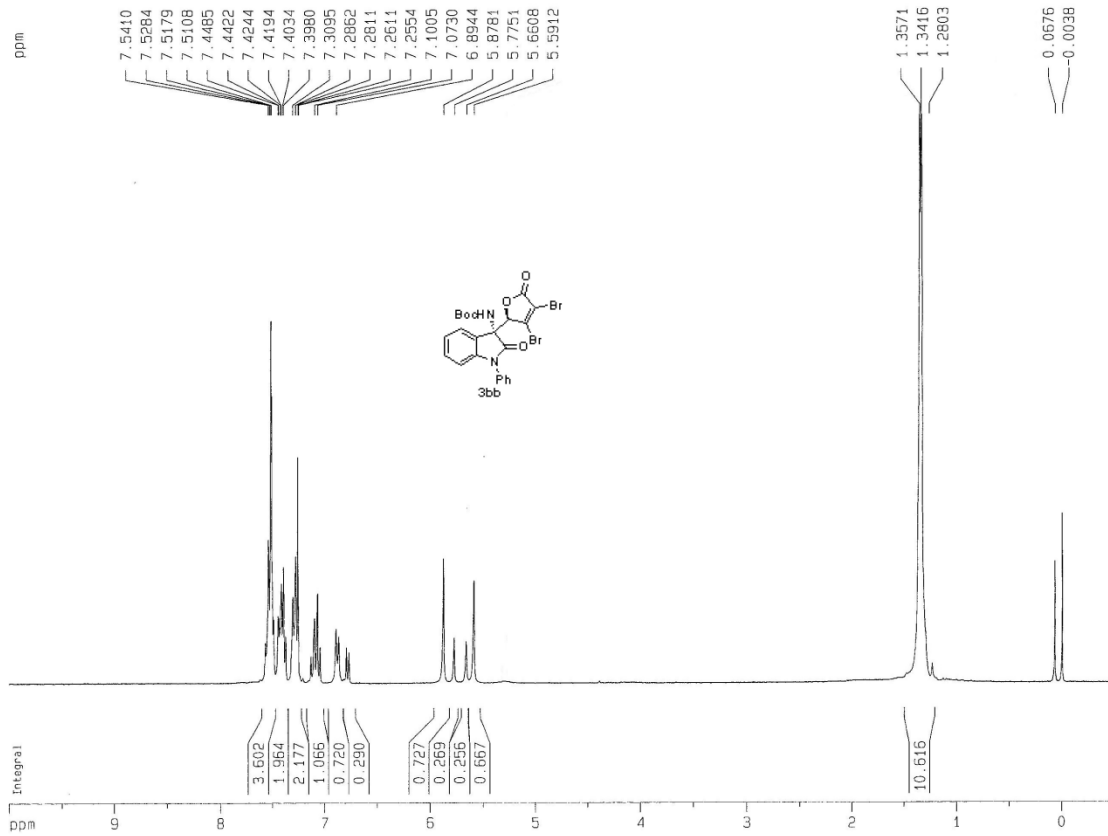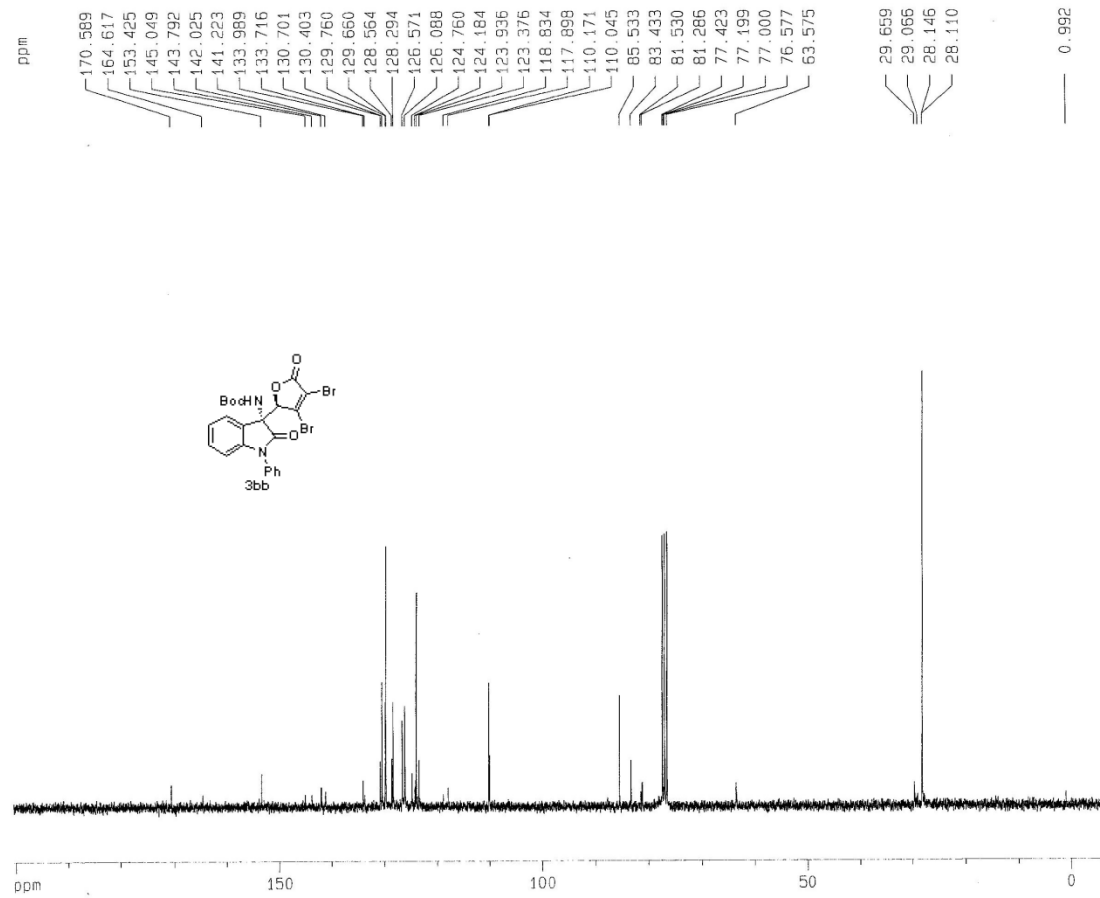

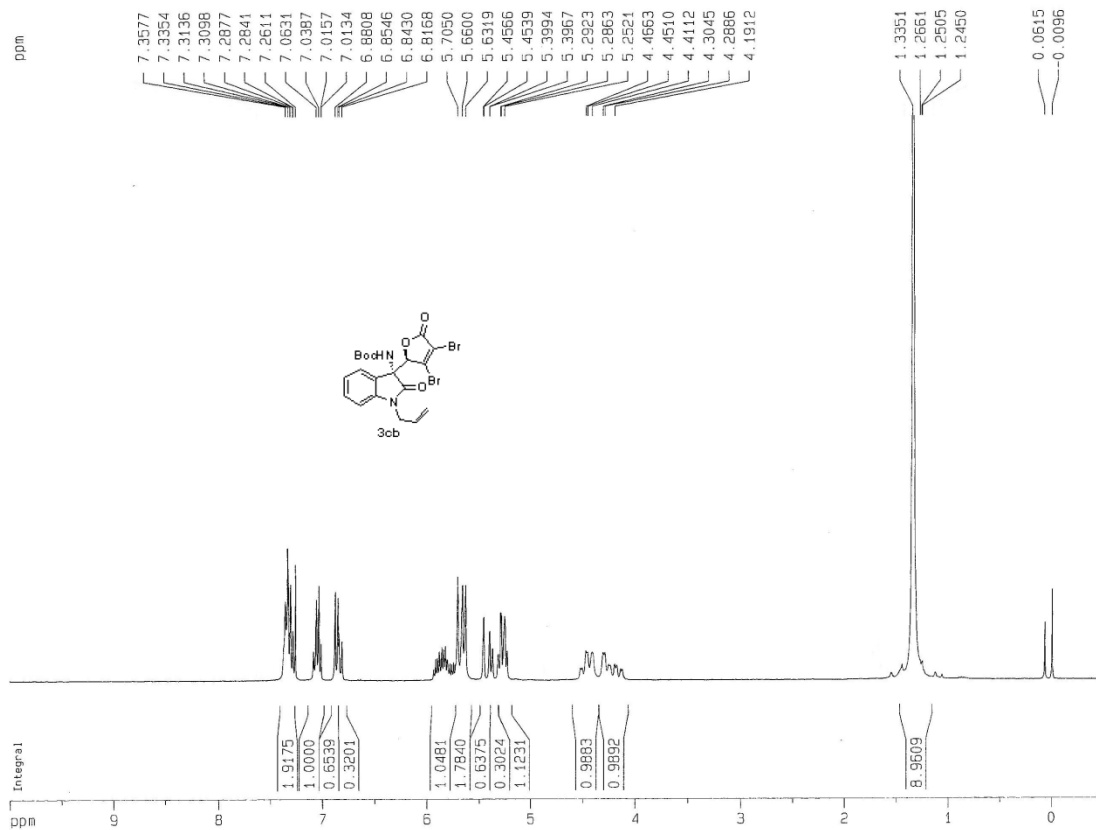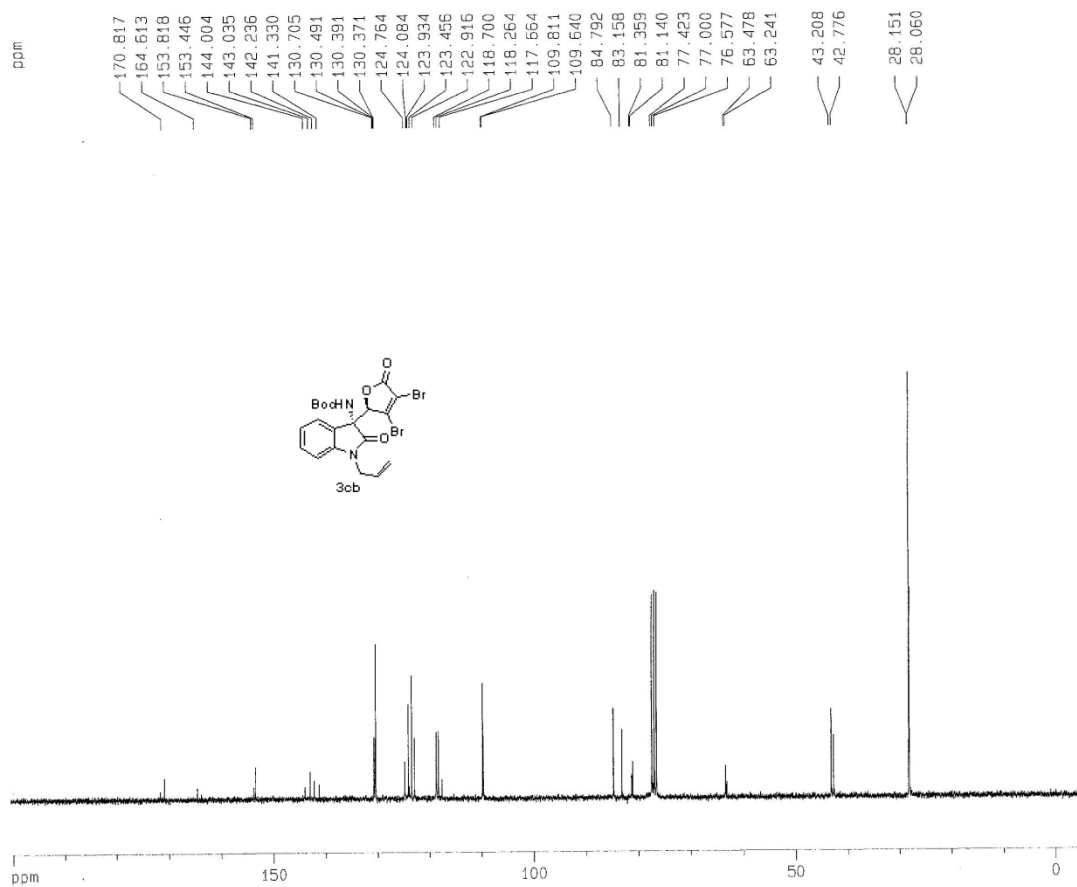



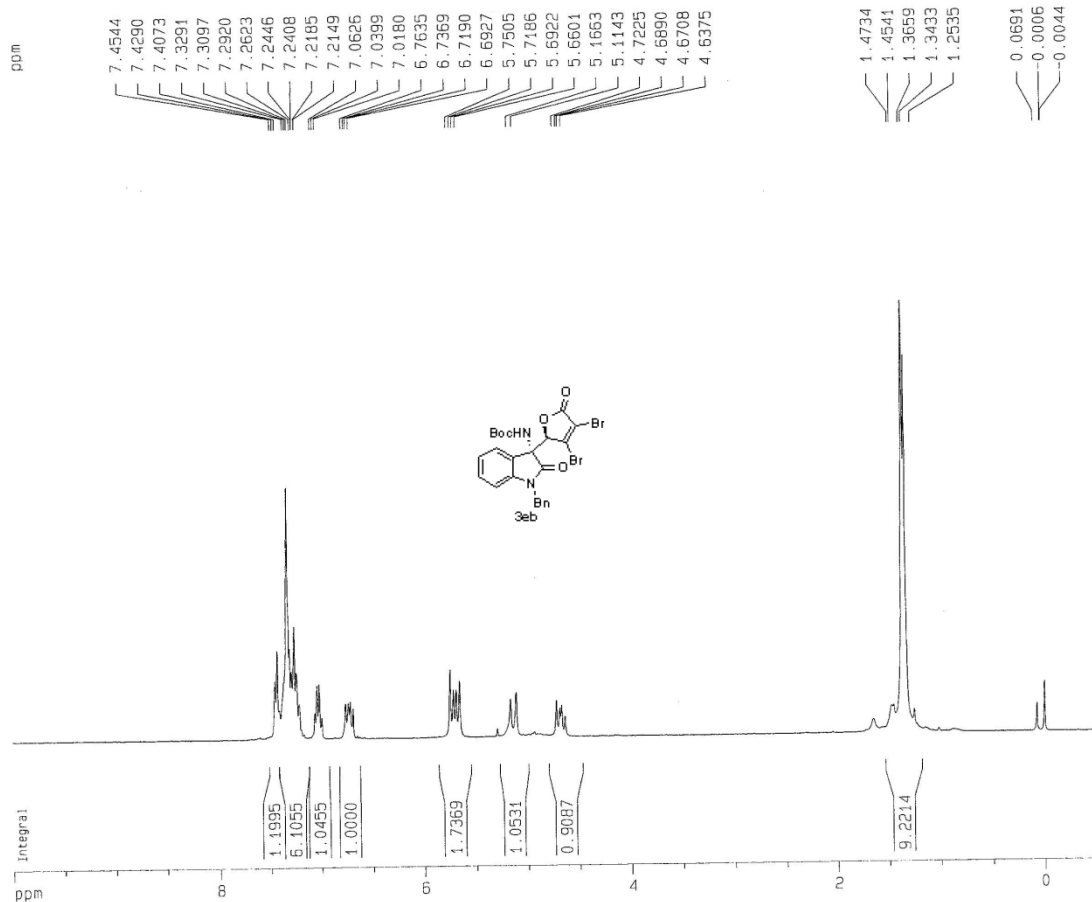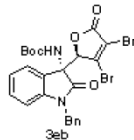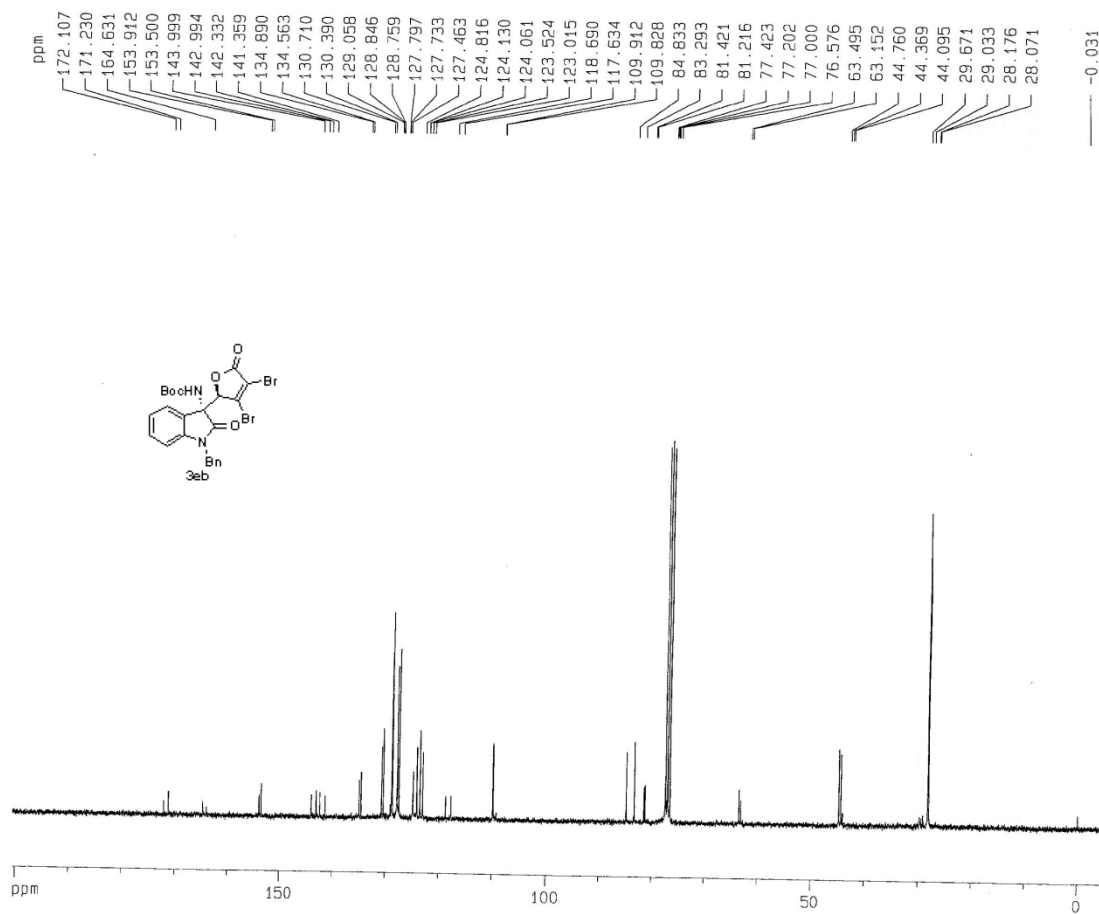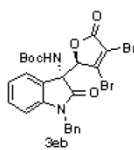

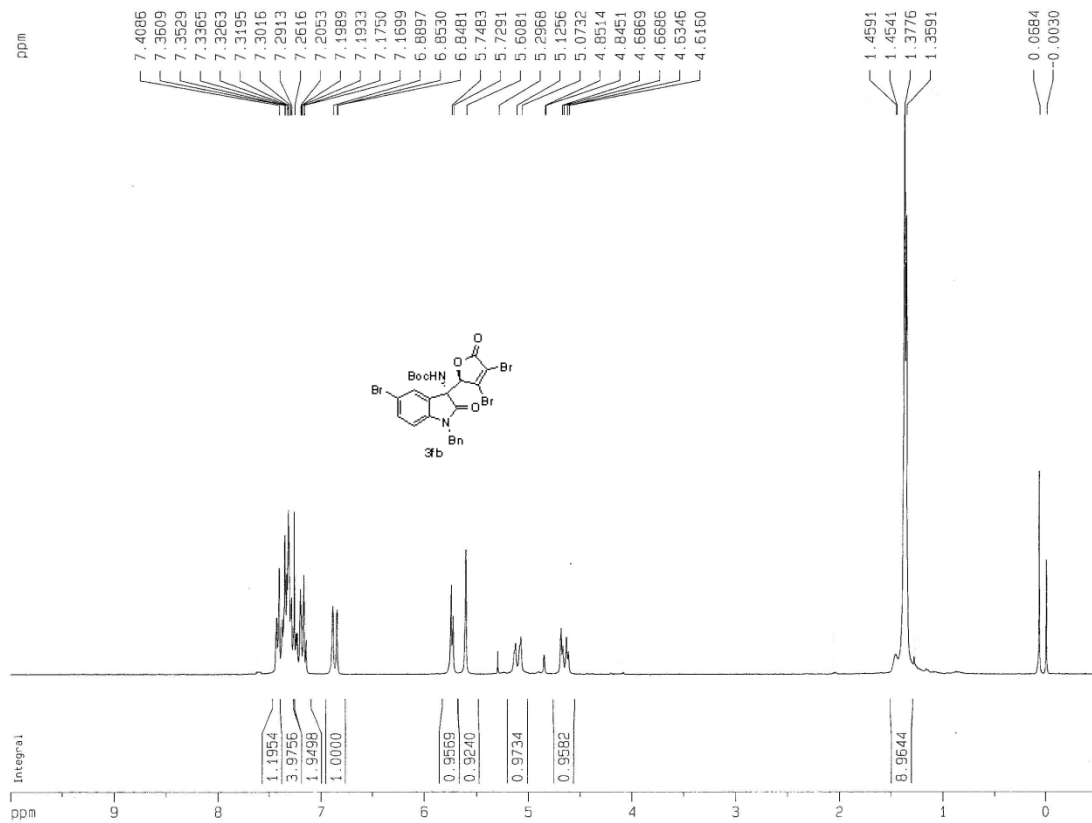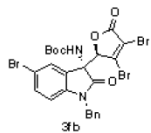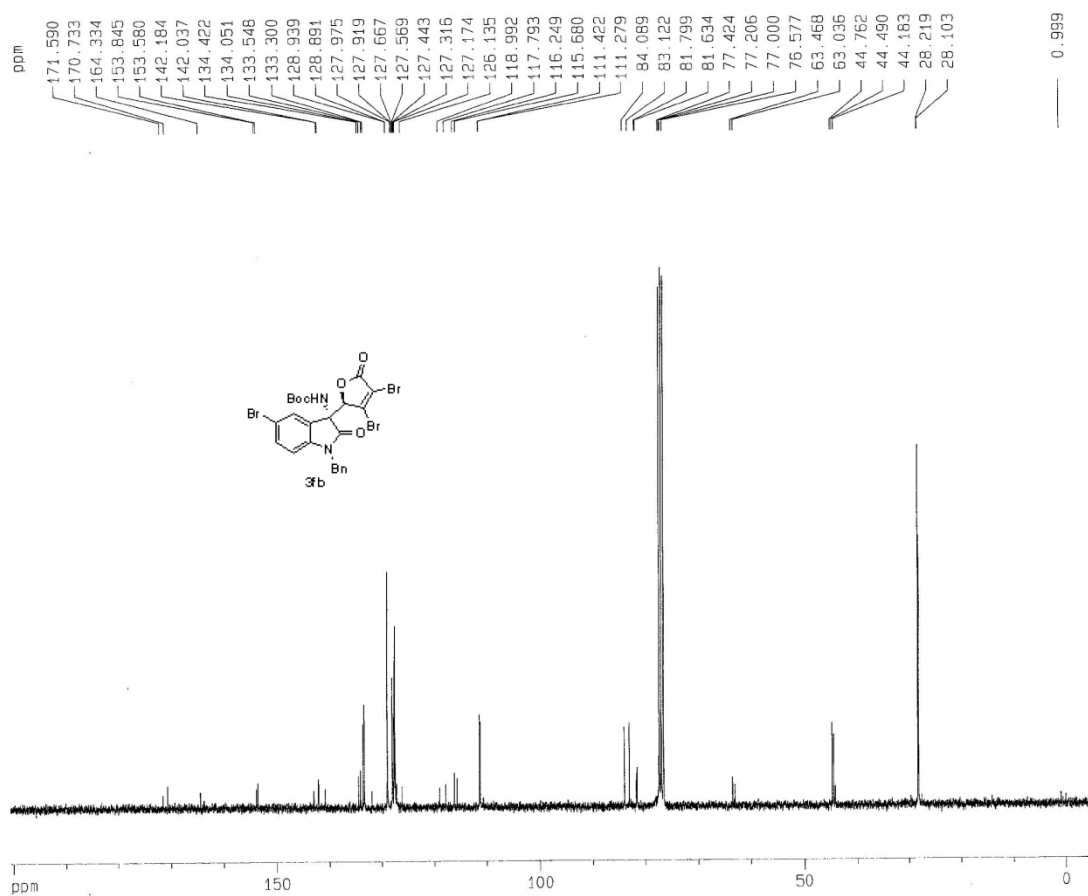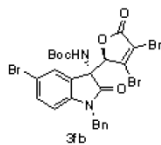

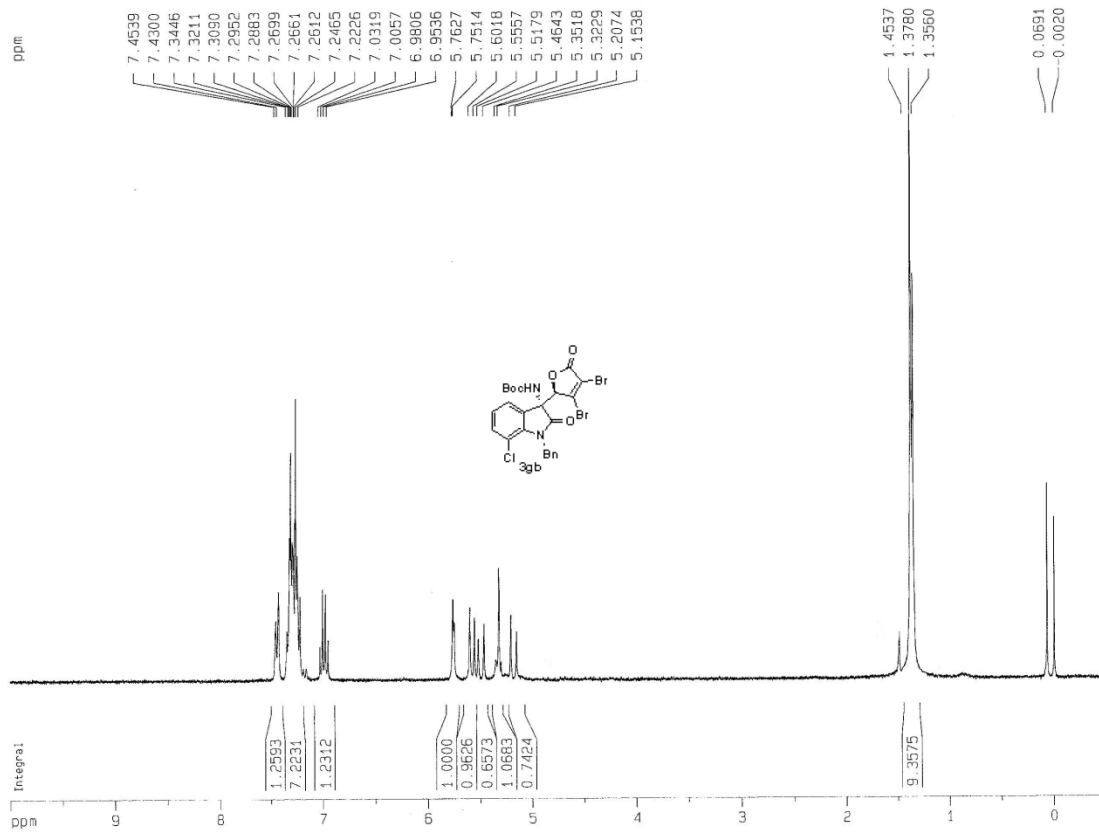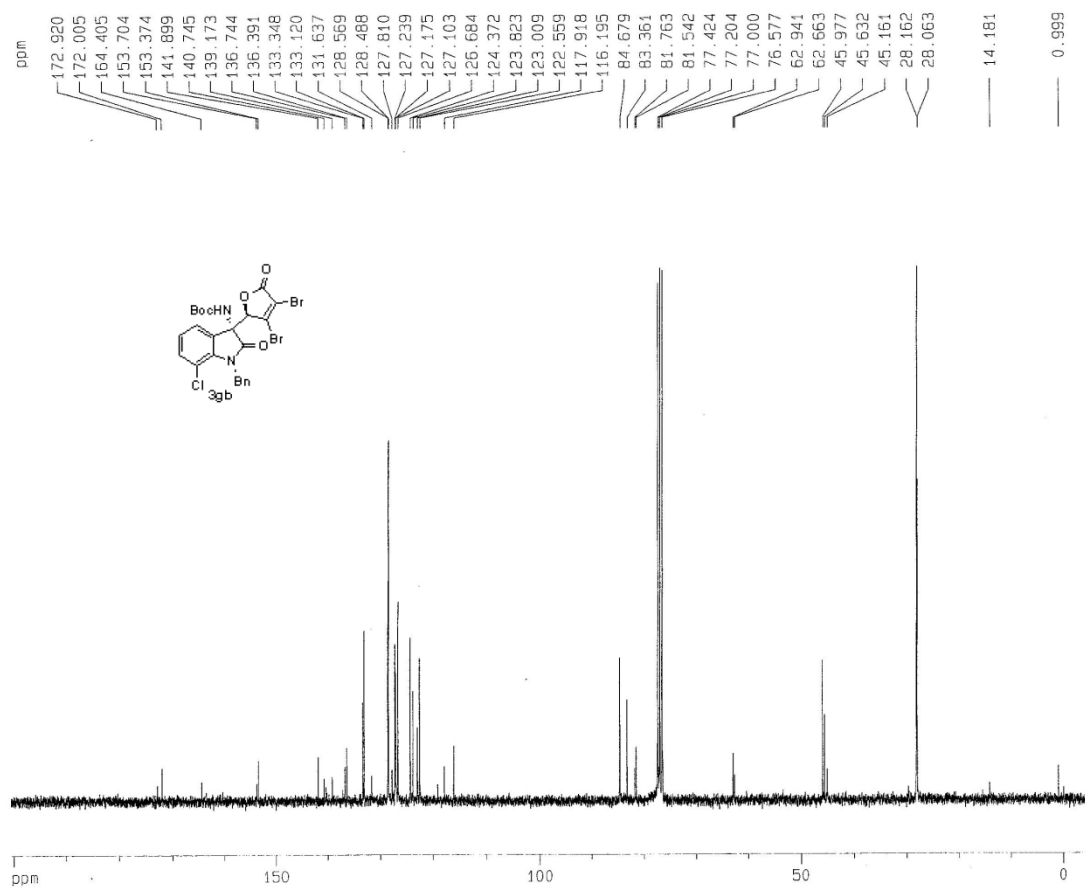

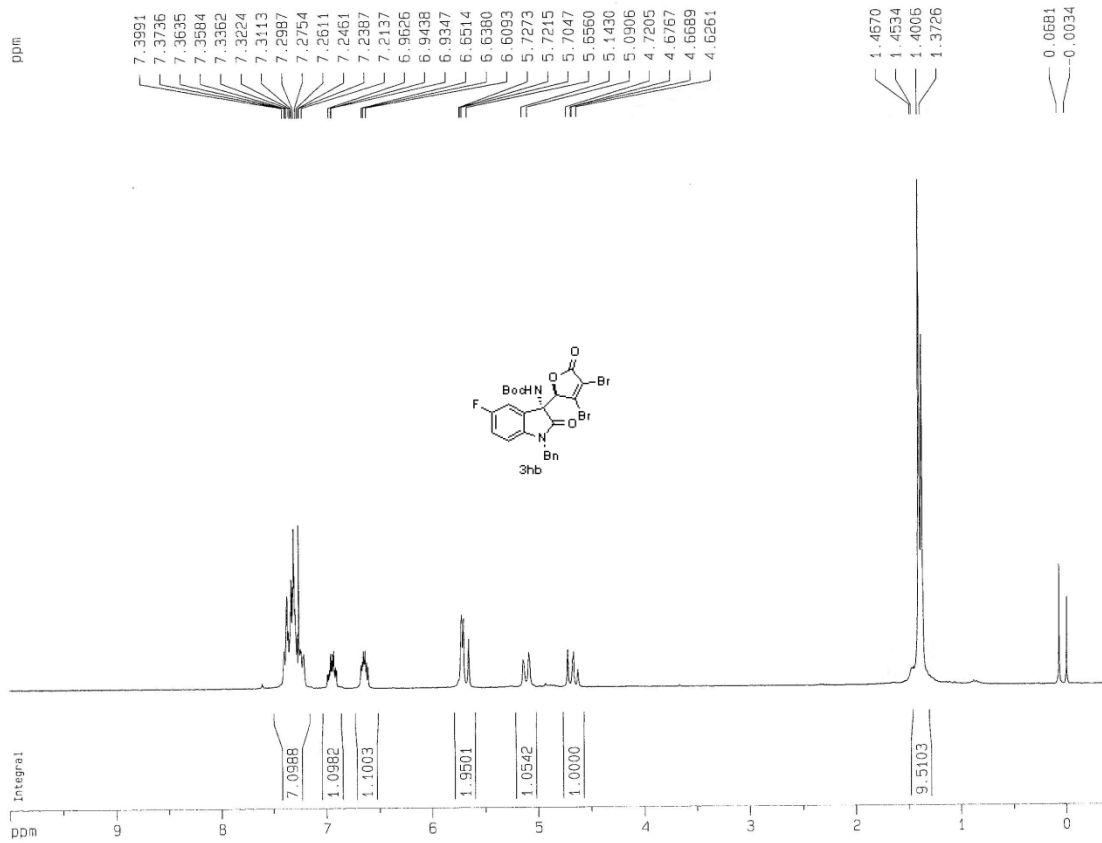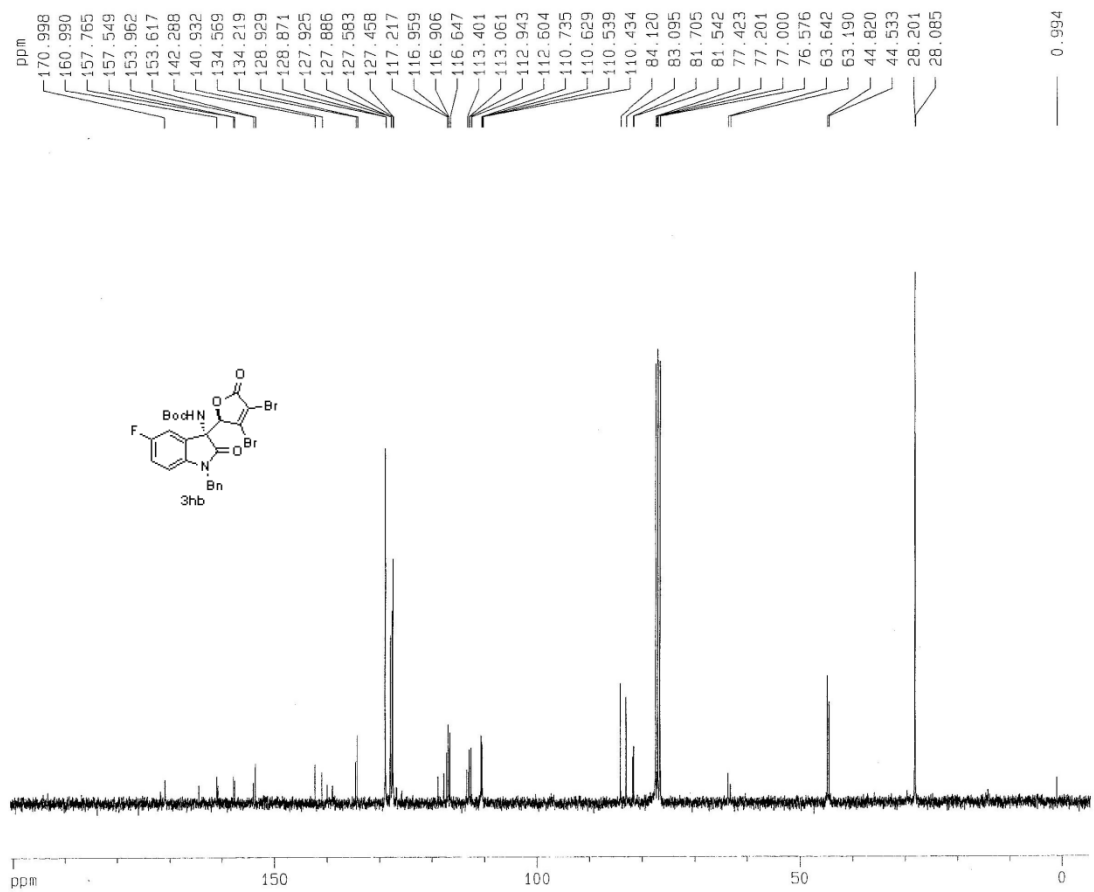

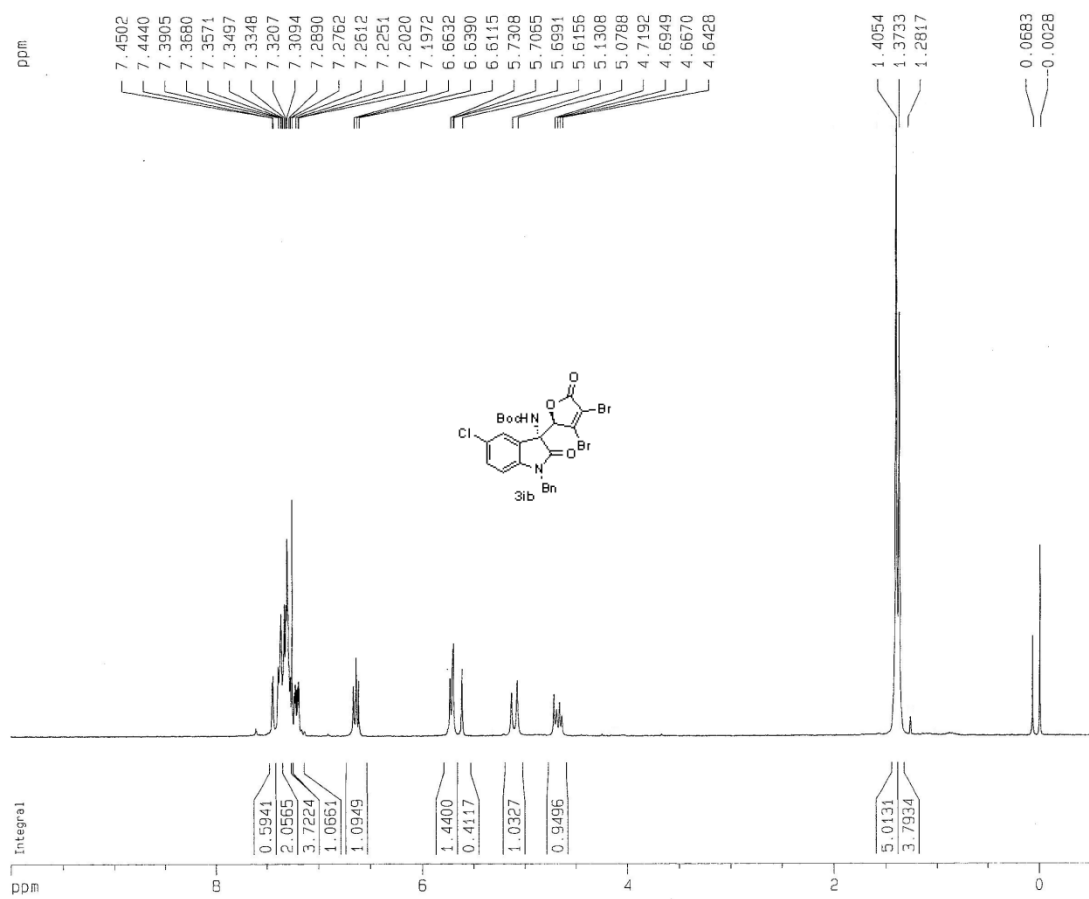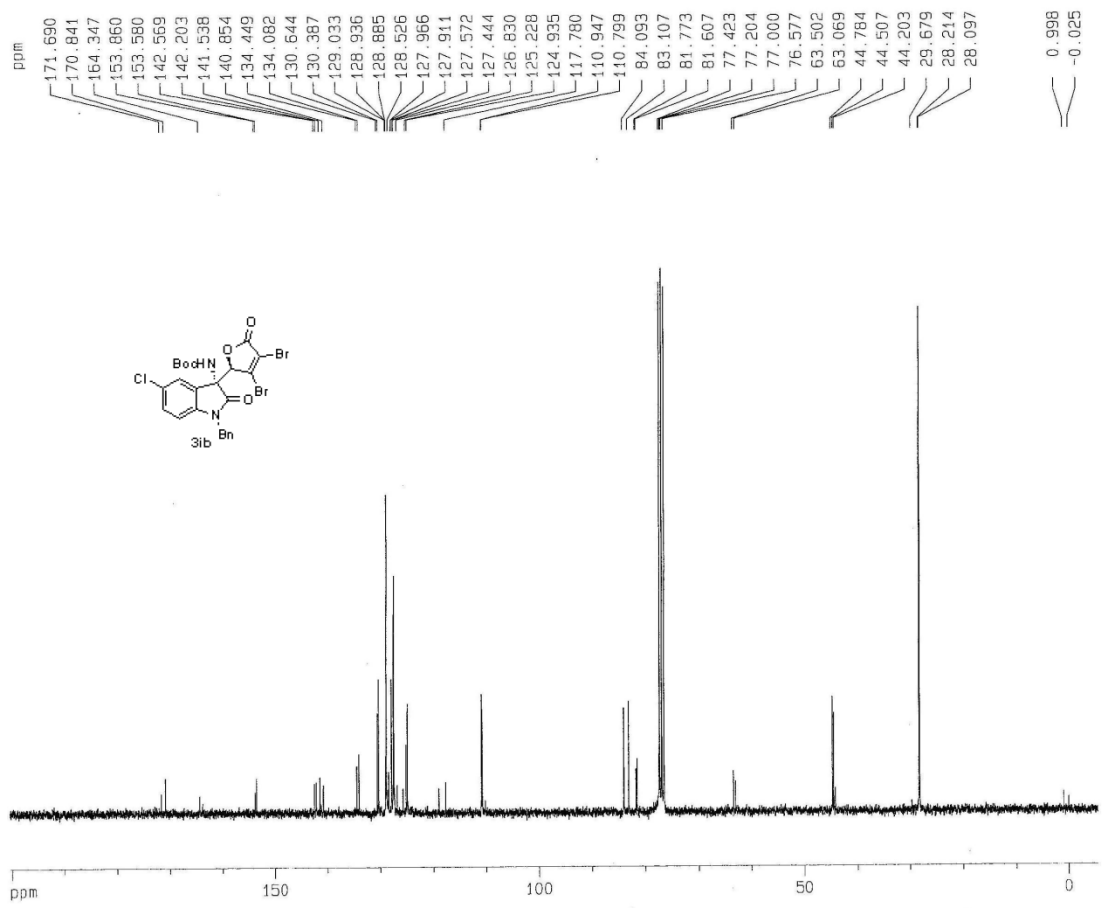

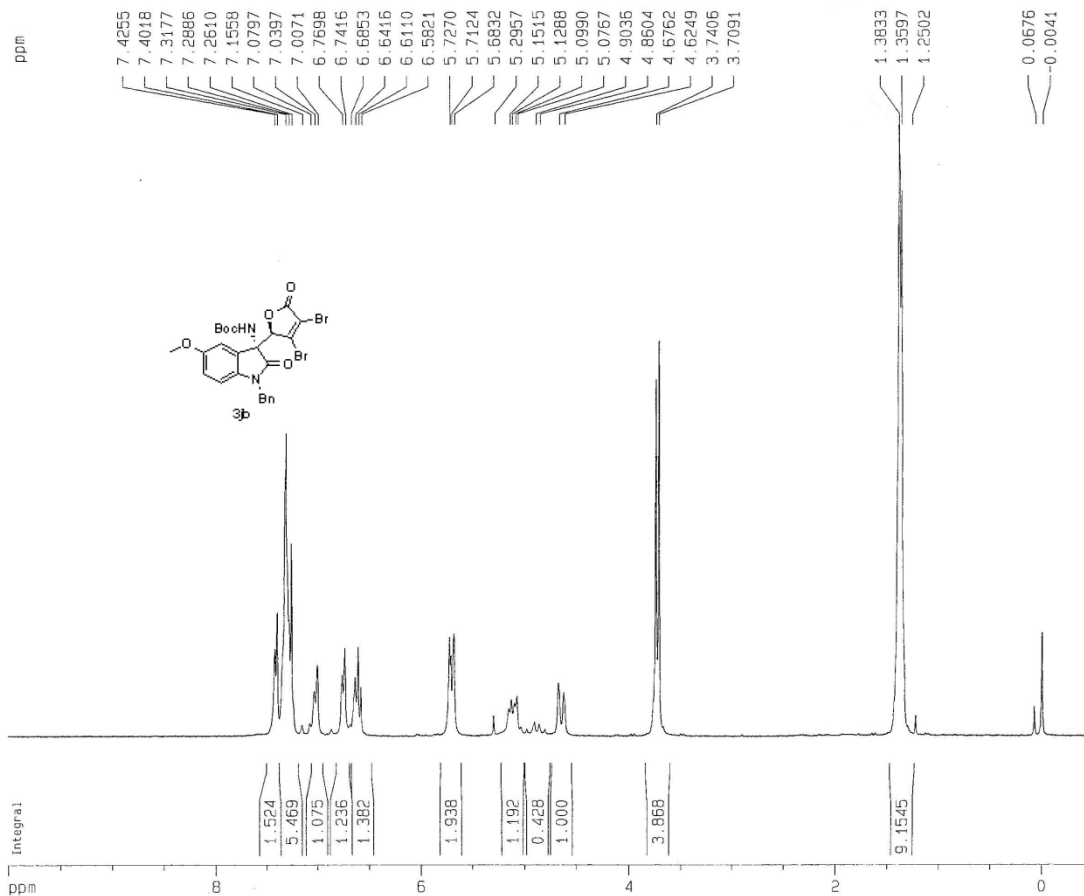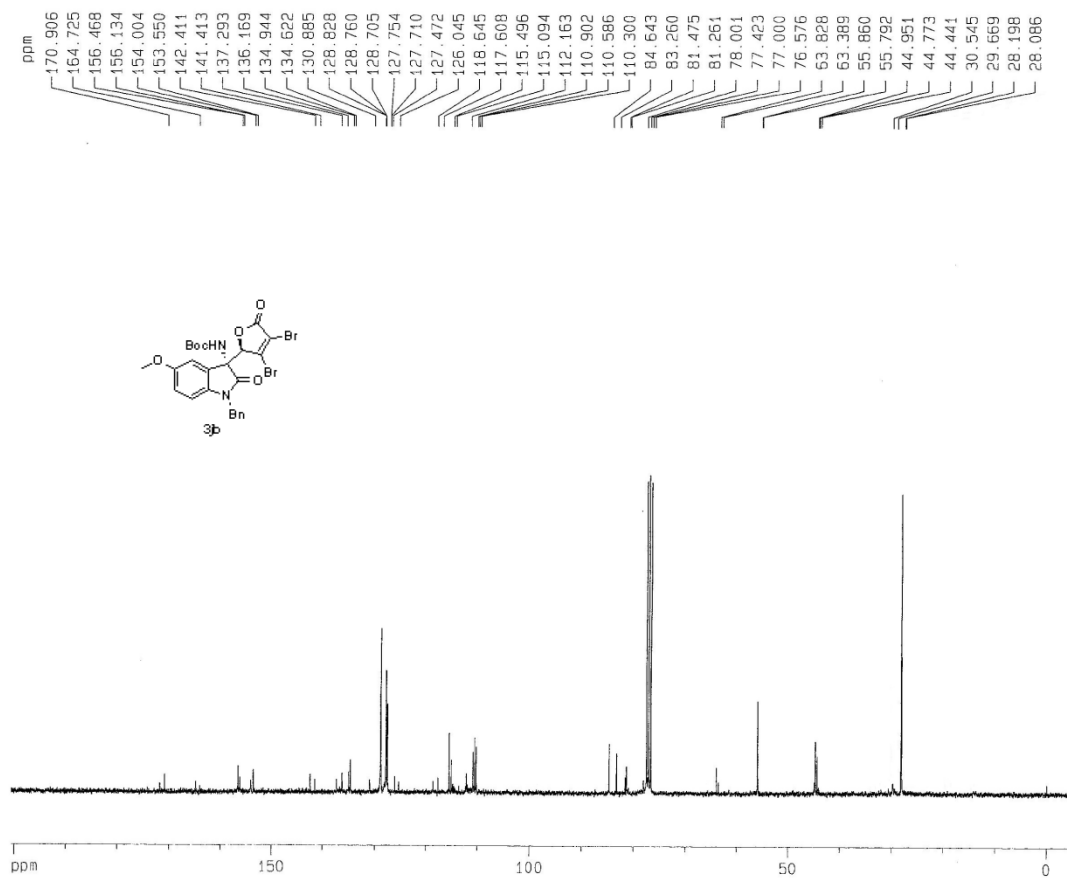

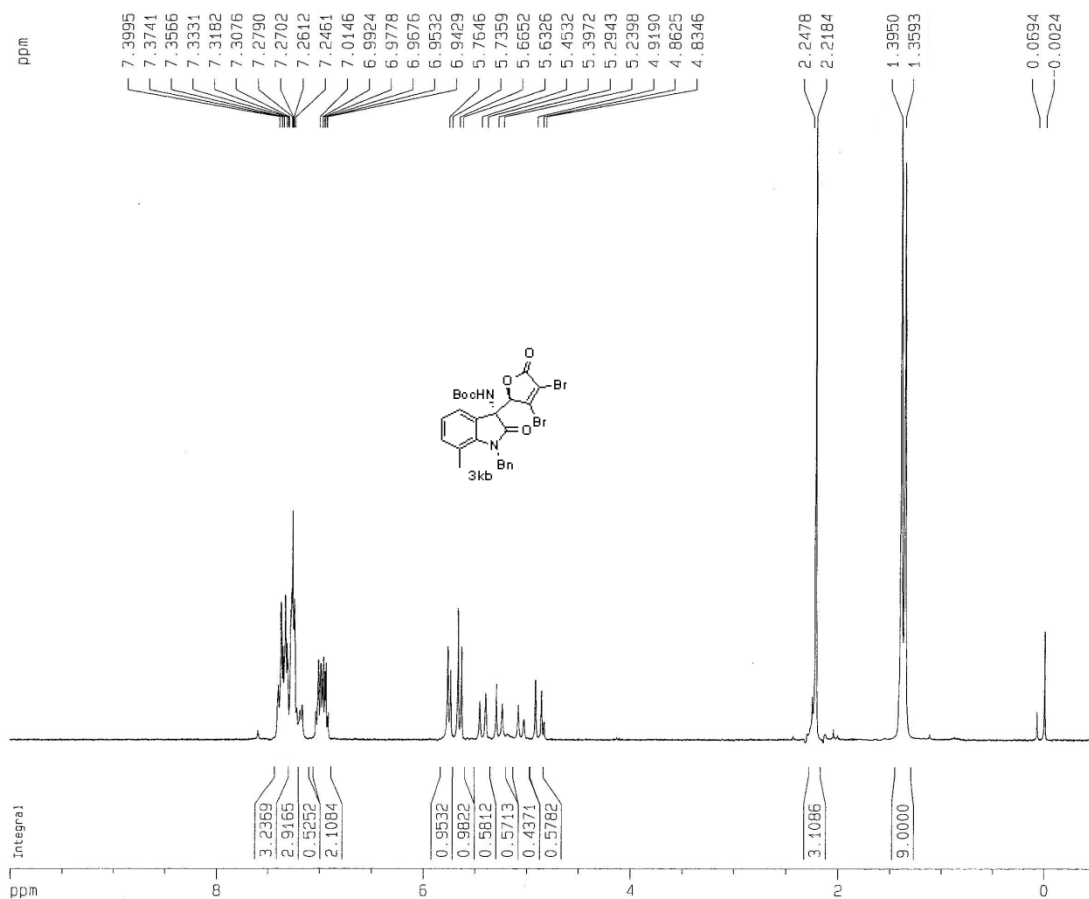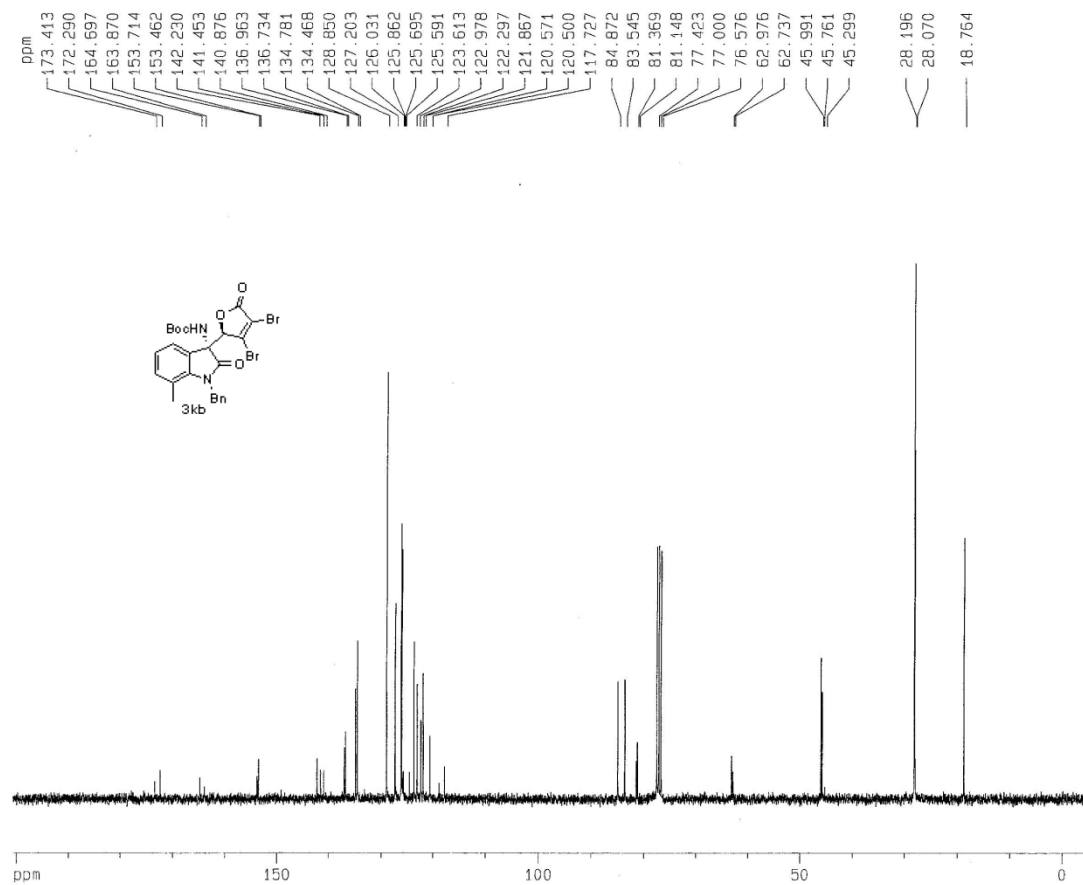

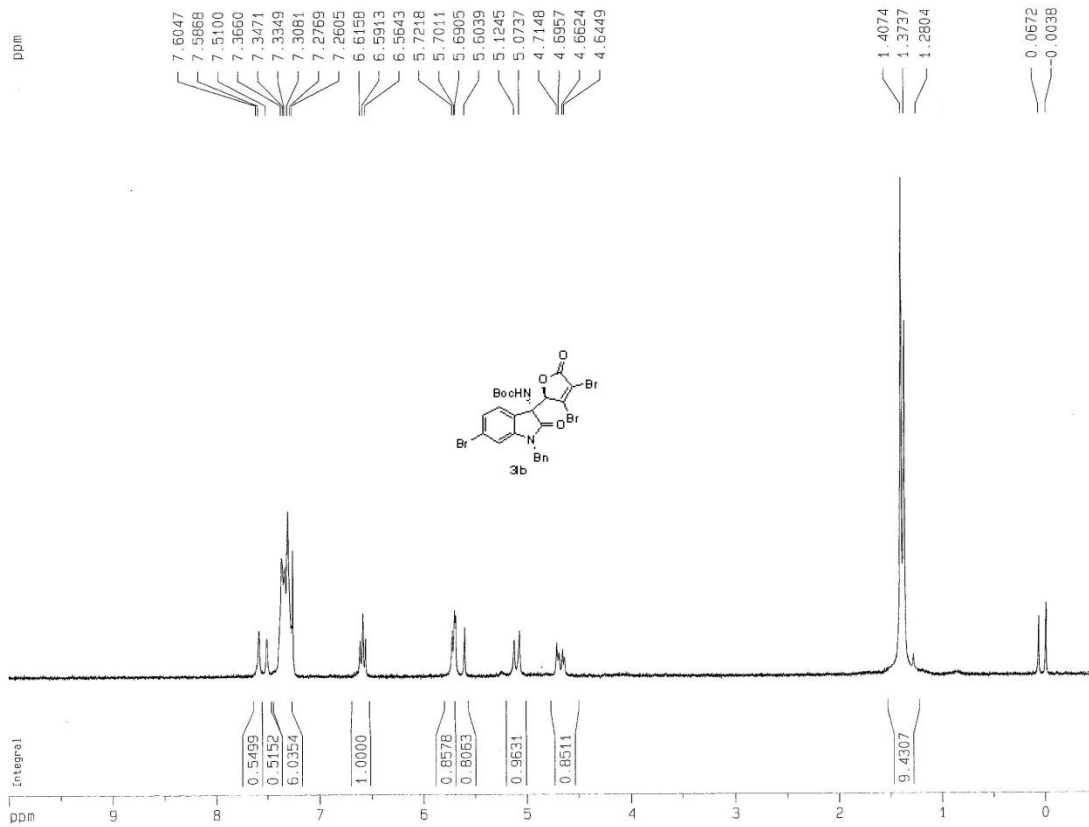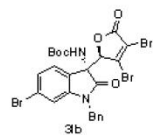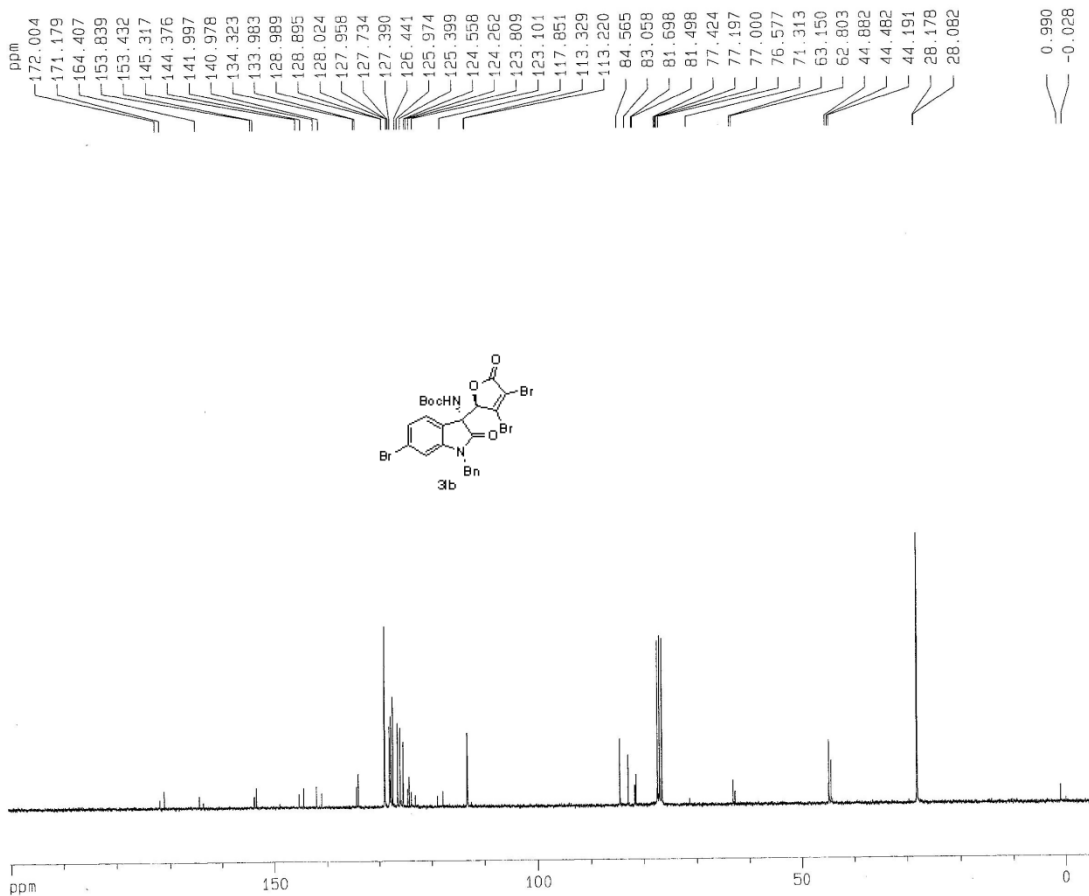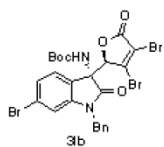



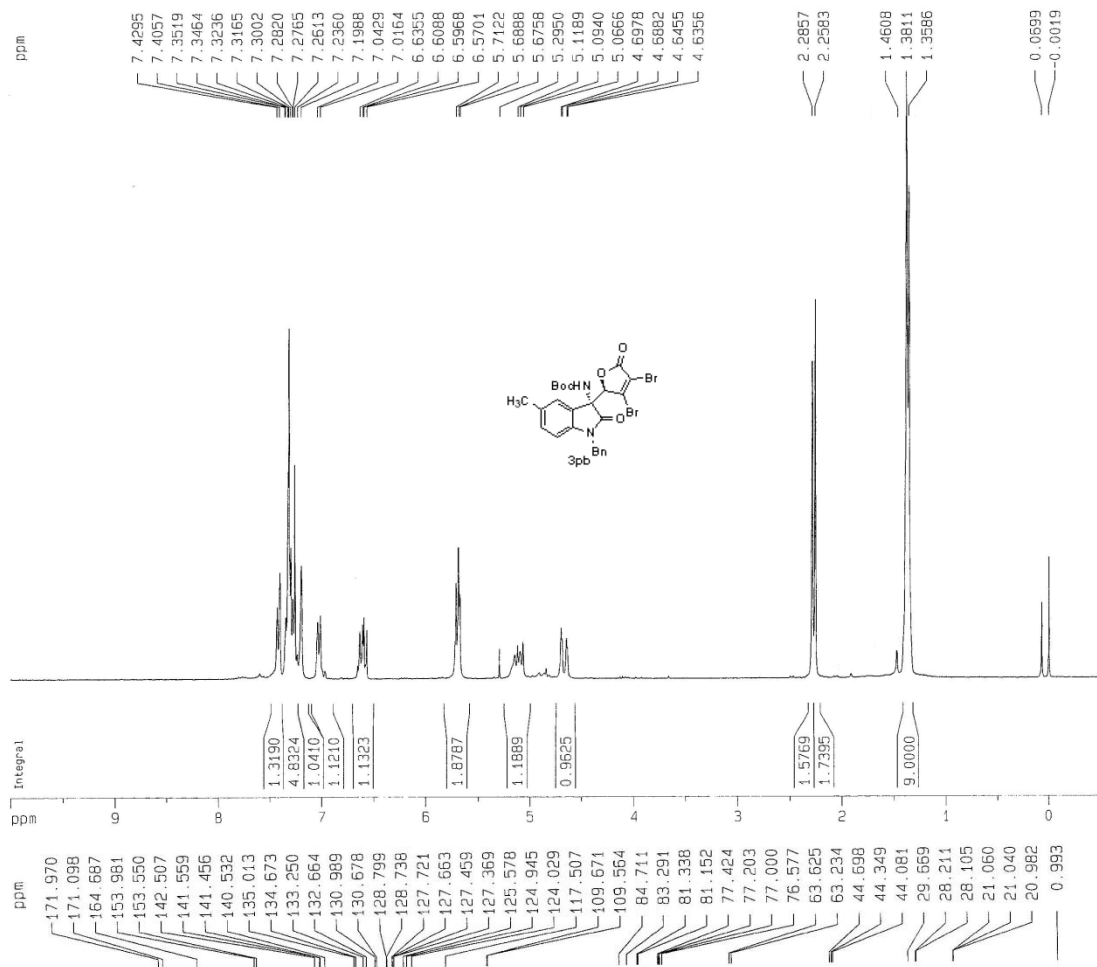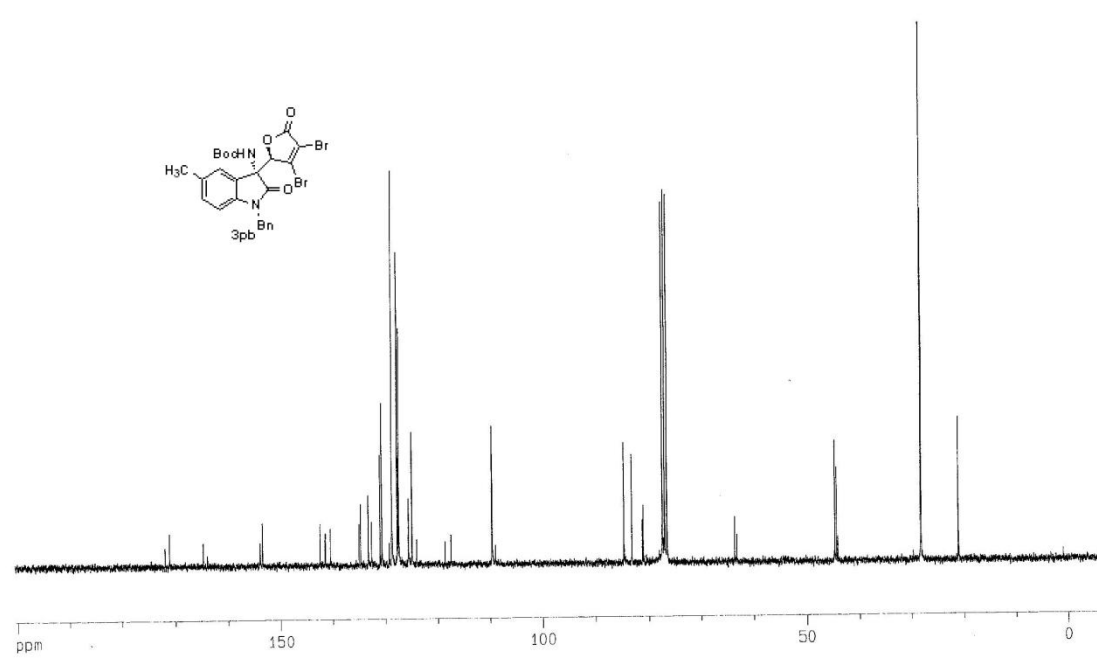

## HPLC Analysis of Products

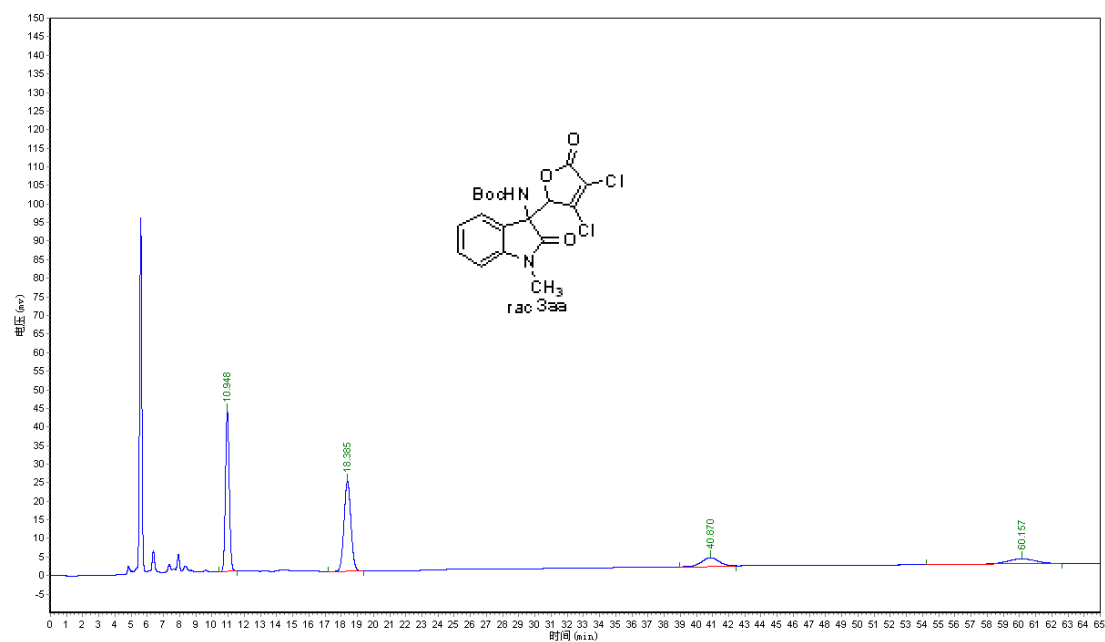

| Peak | RT(min.) | Height(mV*sec) | Area(mV)   | Area(%) |
|------|----------|----------------|------------|---------|
| 1    | 10.948   | 43186.887      | 711754.875 | 40.4866 |
| 2    | 18.385   | 24190.416      | 715714.563 | 40.7118 |
| 3    | 40.870   | 2274.969       | 167526.156 | 9.5293  |
| 4    | 60.157   | 1331.229       | 163006.703 | 9.2723  |

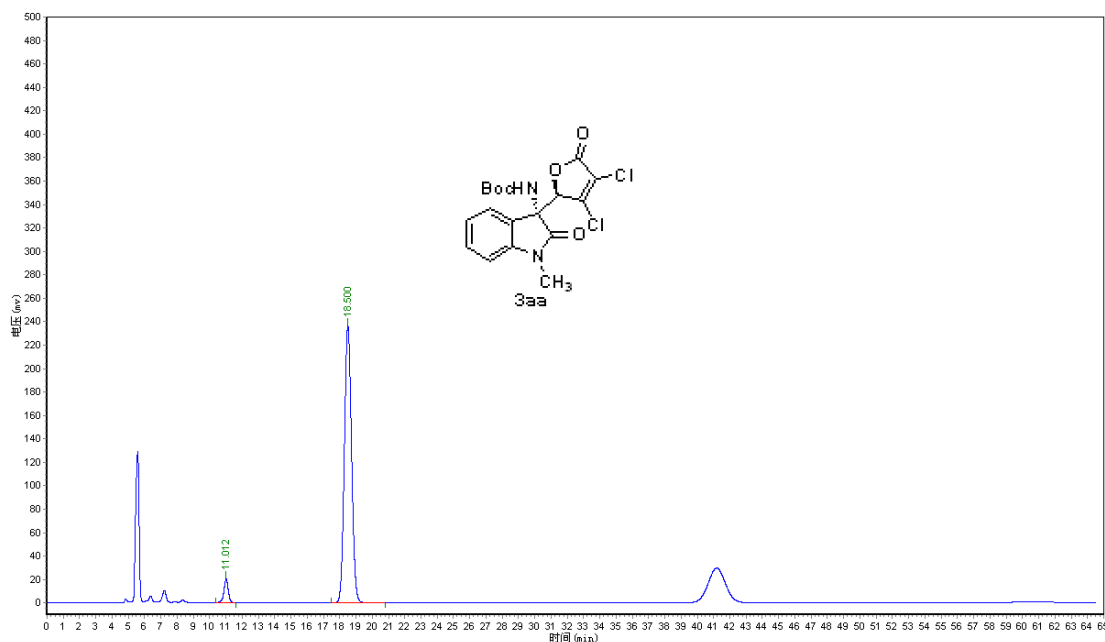

| Peak | RT(min.) | Height(mV*sec) | Area(mV)    | Area(%) |
|------|----------|----------------|-------------|---------|
| 1    | 11.012   | 19974.441      | 373646.688  | 4.8995  |
| 2    | 18.500   | 236715.359     | 7252641.500 | 95.1005 |

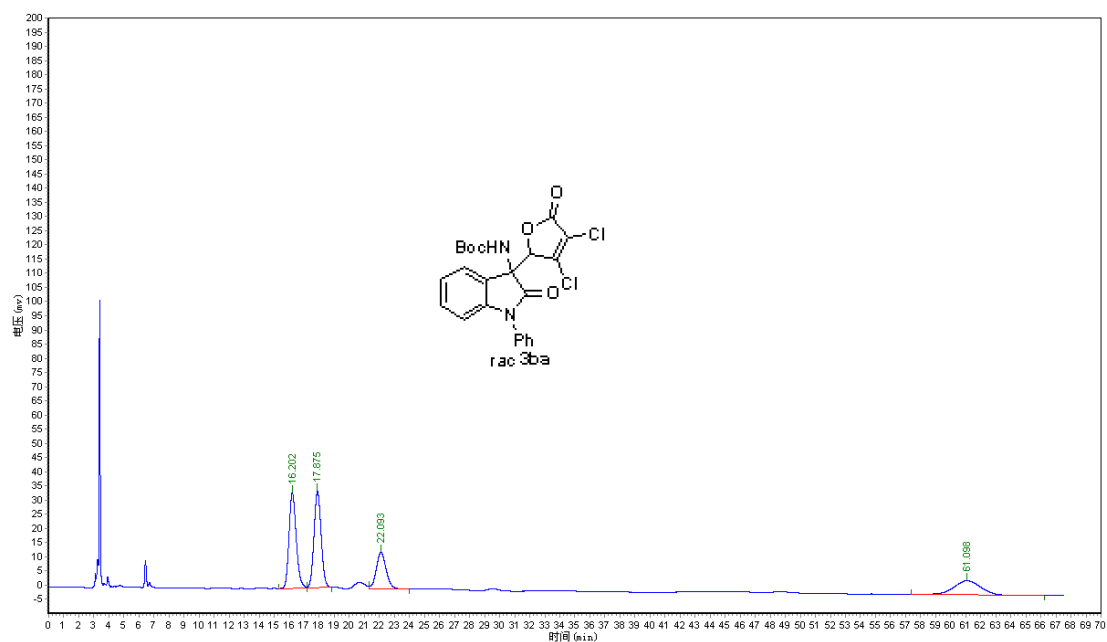

| Peak | RT(min.) | Height(mV*sec) | Area(mV)    | Area(%) |
|------|----------|----------------|-------------|---------|
| 1    | 16.202   | 33600.953      | 1113794.625 | 32.4771 |
| 2    | 17.875   | 33878.523      | 1115014.250 | 32.5126 |
| 3    | 22.093   | 12943.305      | 594039.813  | 17.3216 |
| 4    | 61.098   | 4931.216       | 606631.813  | 17.6887 |

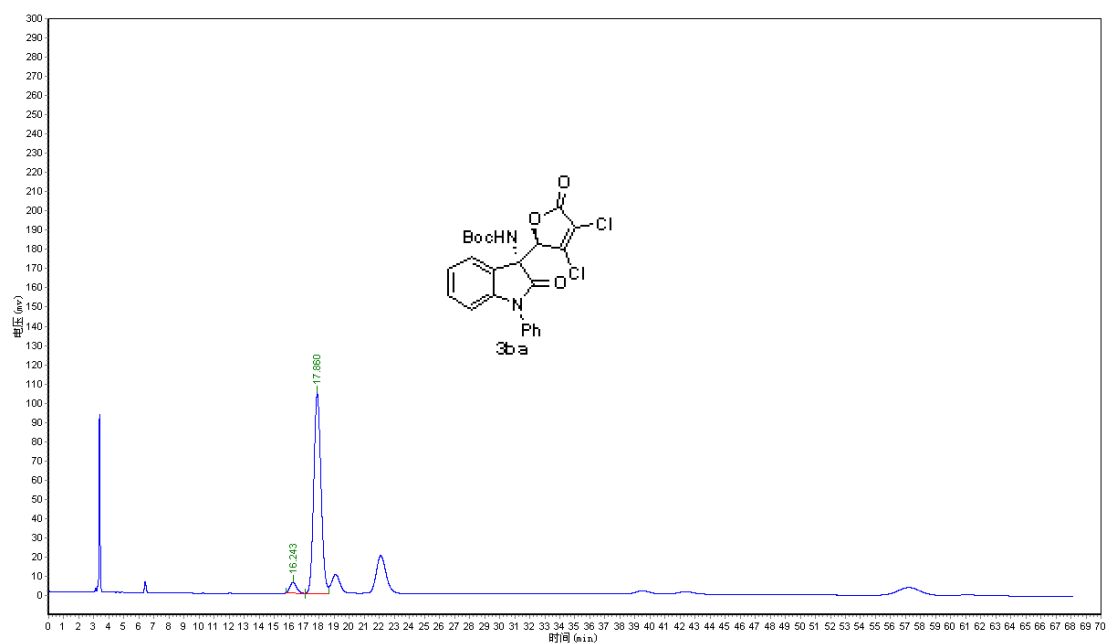

| Peak | RT(min.) | Height(mV*sec) | Area(mV)    | Area(%) |
|------|----------|----------------|-------------|---------|
| 1    | 16.243   | 5525.462       | 173562.406  | 4.7335  |
| 2    | 17.860   | 103801.141     | 3493101.750 | 95.2665 |

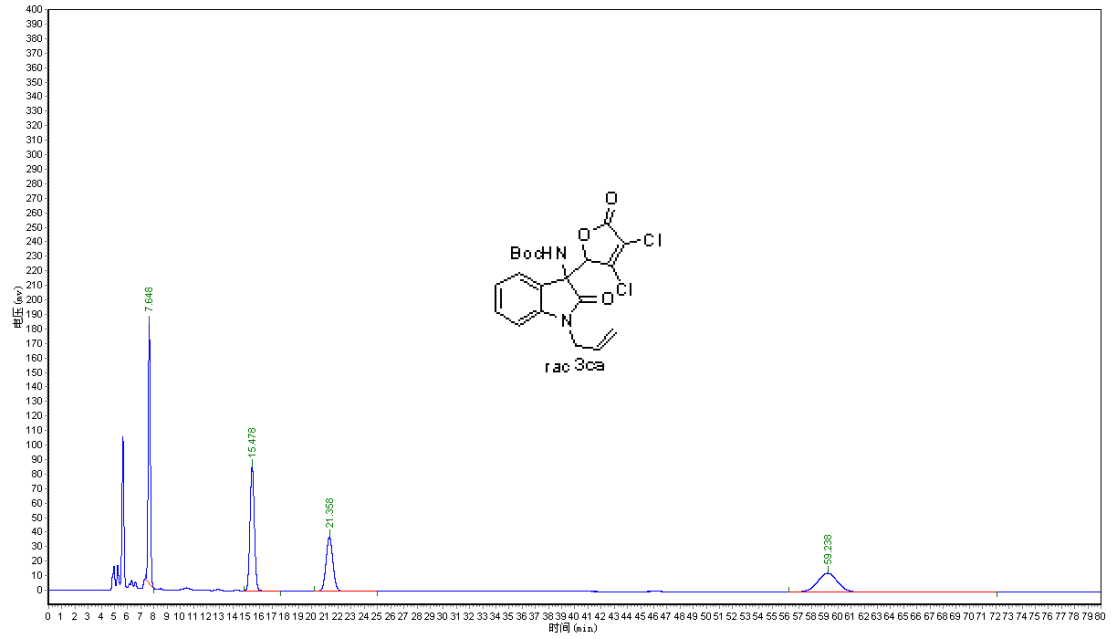

| Peak | RT(min.) | Height(mV*sec) | Area(mV)    | Area(%) |
|------|----------|----------------|-------------|---------|
| 1    | 7.648    | 183144.641     | 2176273.750 | 31.7517 |
| 2    | 15.478   | 85848.430      | 1994313.750 | 29.0969 |
| 3    | 21.358   | 37227.109      | 1340752.750 | 19.5615 |
| 4    | 59.238   | 12830.772      | 1342702.875 | 19.5899 |

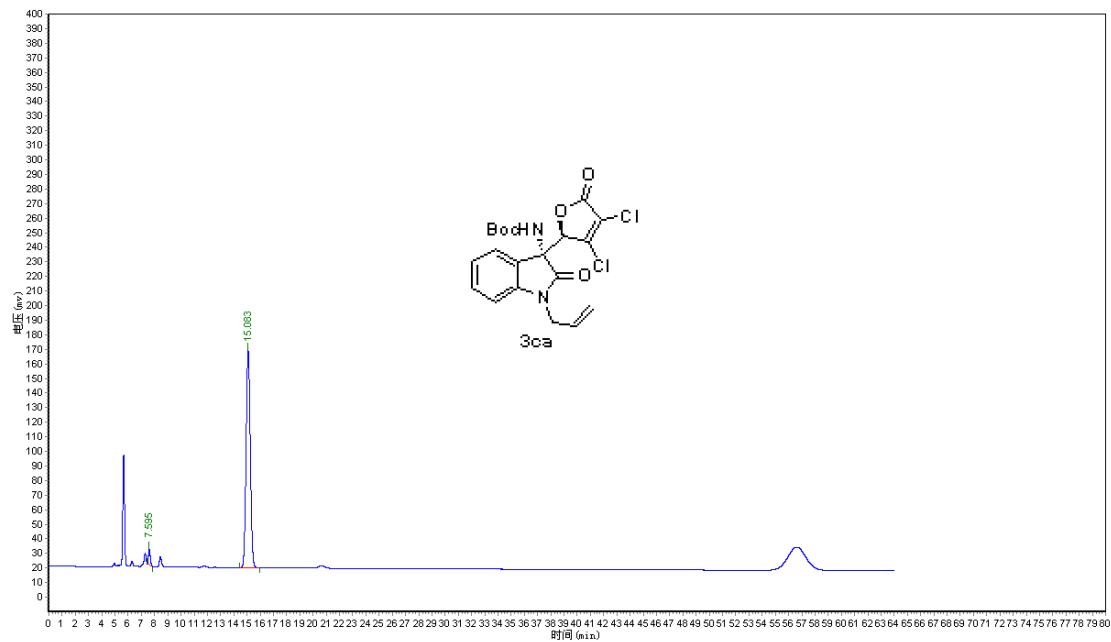

| Peak | RT(min.) | Height(mV*sec) | Area(mV)    | Area(%) |
|------|----------|----------------|-------------|---------|
| 1    | 7.595    | 10553.082      | 103795.008  | 3.0559  |
| 2    | 15.083   | 148866.172     | 3292759.250 | 96.9441 |

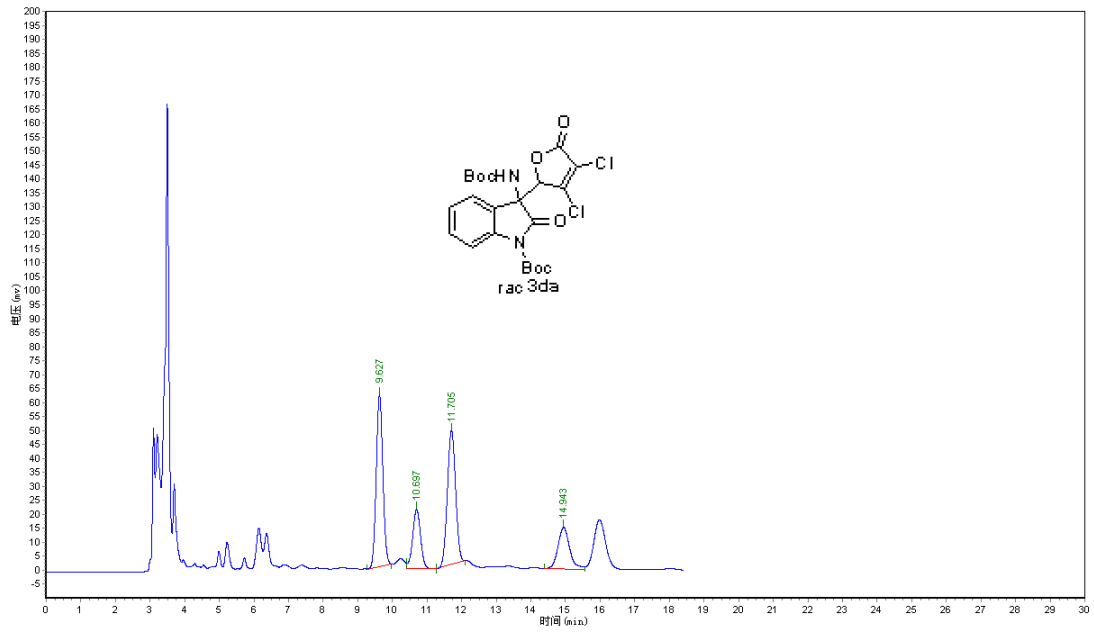

| Peak | RT(min.) | Height(mV*sec) | Area(mV)   | Area(%) |
|------|----------|----------------|------------|---------|
| 1    | 9.627    | 61465.477      | 817143.938 | 35.6555 |
| 2    | 10.697   | 21315.629      | 341022.094 | 14.8803 |
| 3    | 11.705   | 47904.750      | 790038.188 | 34.4728 |
| 4    | 14.943   | 14750.278      | 343571.406 | 14.9915 |

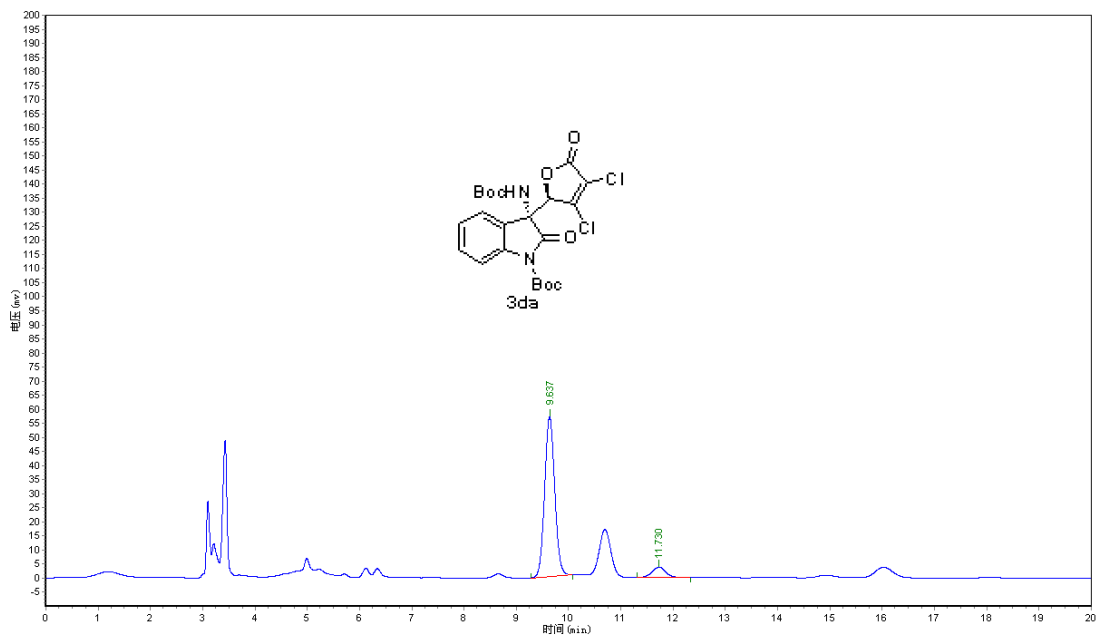

| Peak | RT(min.) | Height(mV*sec) | Area(mV)   | Area(%) |
|------|----------|----------------|------------|---------|
| 1    | 9.637    | 56766.391      | 761780.313 | 91.6742 |
| 2    | 11.730   | 3713.199       | 69184.102  | 8.3258  |

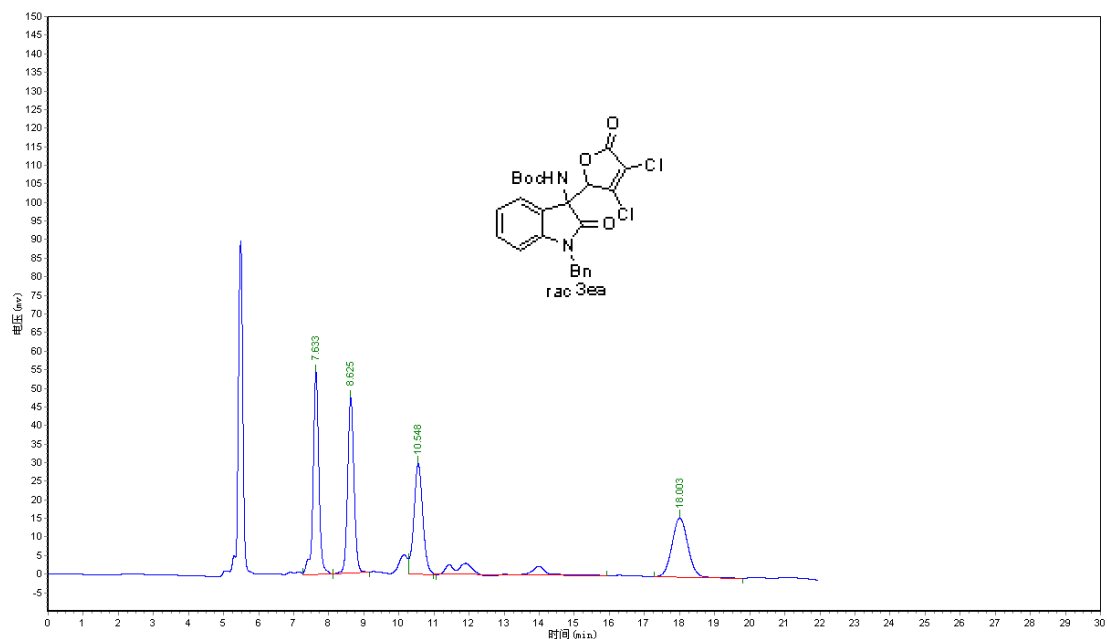

| Peak | RT(min.) | Height(mV*sec) | Area(mV)   | Area(%) |
|------|----------|----------------|------------|---------|
| 1    | 7.633    | 54341.012      | 623894.500 | 28.3394 |
| 2    | 8.625    | 47158.332      | 593187.813 | 26.9446 |
| 3    | 10.548   | 29747.672      | 524894.688 | 23.8425 |
| 5    | 18.003   | 15919.872      | 496869.656 | 22.5695 |

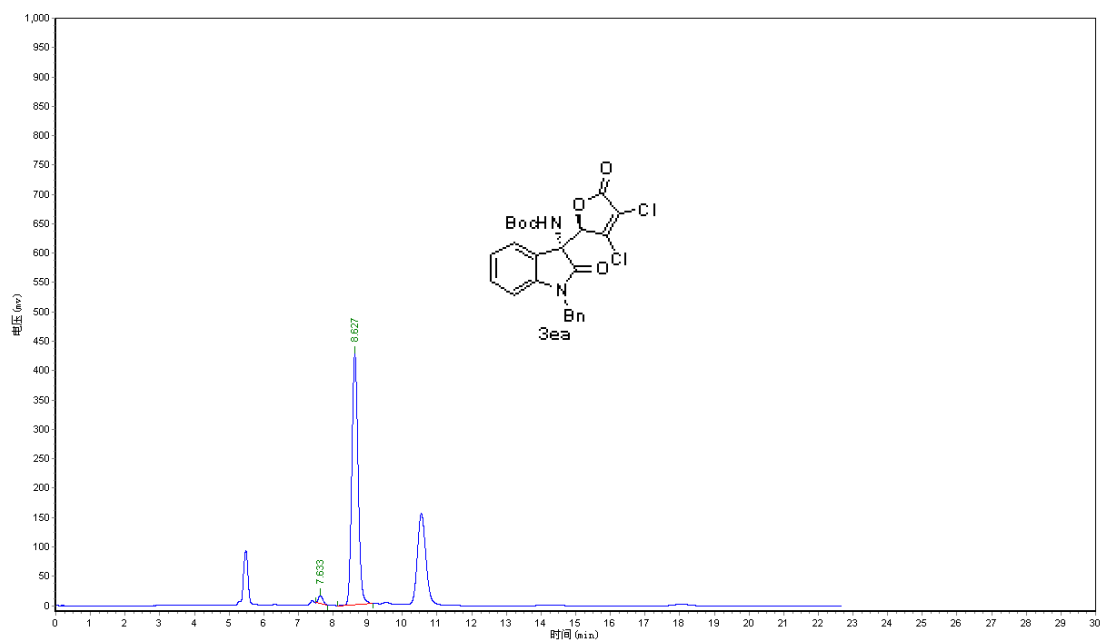

| Peak | RT(min.) | Height(mV*sec) | Area(mV)    | Area(%) |
|------|----------|----------------|-------------|---------|
| 1    | 7.633    | 13640.335      | 121941.594  | 2.2217  |
| 2    | 8.627    | 427458.063     | 5366768.000 | 97.7783 |

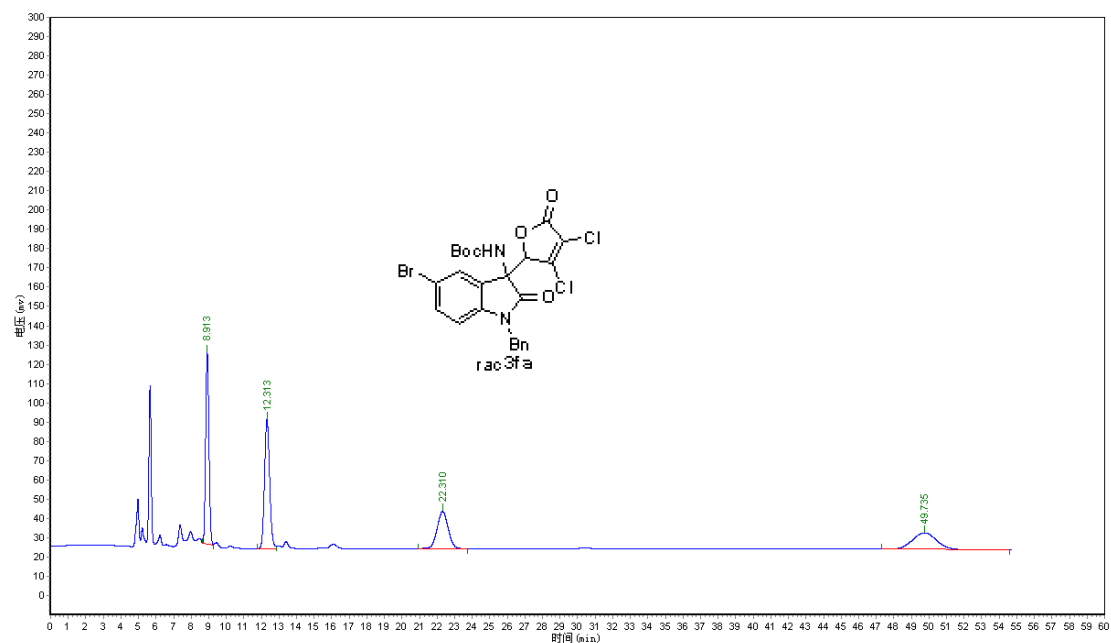

| Peak | RT(min.) | Height(mV*sec) | Area(mV)    | Area(%) |
|------|----------|----------------|-------------|---------|
| 1    | 8.913    | 99327.906      | 1305766.750 | 30.2931 |
| 2    | 12.313   | 66992.805      | 1361081.125 | 31.5763 |
| 3    | 22.310   | 19147.713      | 823689.000  | 19.1091 |
| 4    | 49.735   | 8576.276       | 819908.625  | 19.0214 |

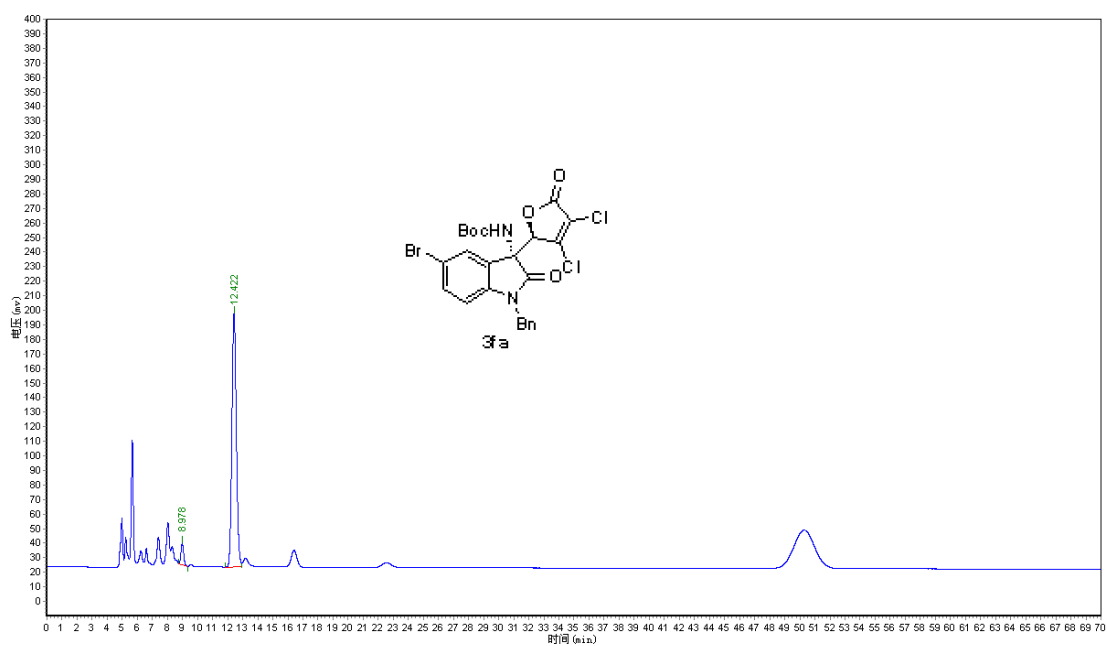

| Peak | RT(min.) | Height(mV*sec) | Area(mV)    | Area(%) |
|------|----------|----------------|-------------|---------|
| 1    | 8.978    | 14583.021      | 184964.438  | 4.9049  |
| 2    | 12.422   | 174090.234     | 3586045.500 | 95.0951 |

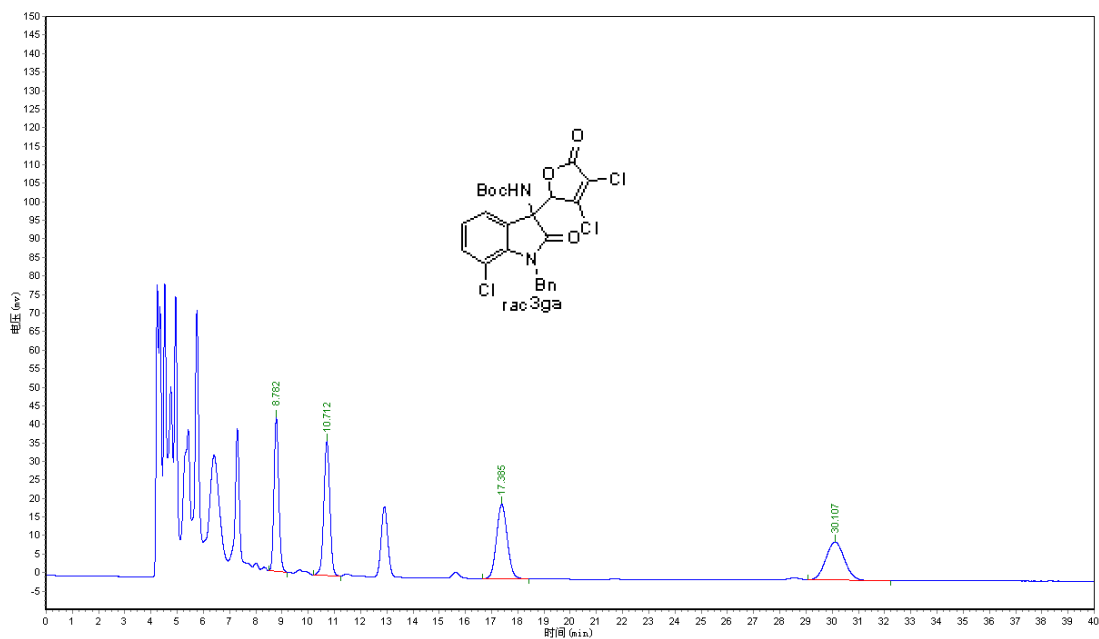

| Peak | RT(min.) | Height(mV*sec) | Area(mV)   | Area(%) |
|------|----------|----------------|------------|---------|
| 1    | 8.782    | 41439.375      | 522852.563 | 24.0422 |
| 2    | 10.712   | 36174.777      | 576136.625 | 26.4923 |
| 3    | 17.385   | 20045.479      | 572187.313 | 26.3107 |
| 4    | 30.107   | 10279.355      | 503552.688 | 23.1547 |

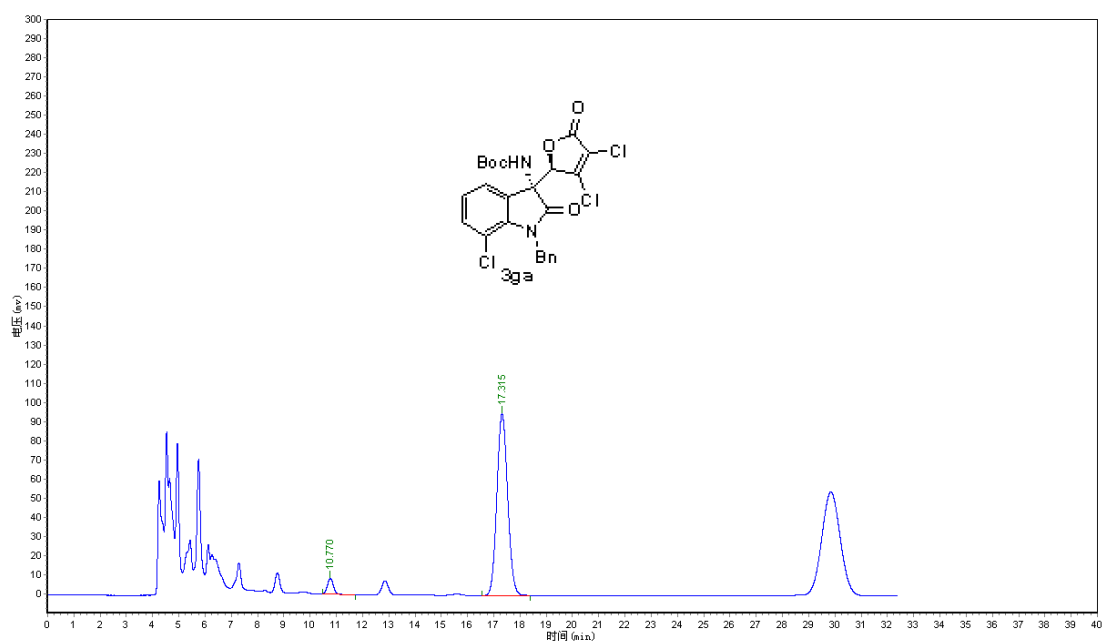

| Peak | RT(min.) | Height(mV*sec) | Area(mV)    | Area(%) |
|------|----------|----------------|-------------|---------|
| 1    | 10.770   | 8179.040       | 124052.547  | 4.3794  |
| 2    | 17.315   | 94831.602      | 2708588.750 | 95.6206 |



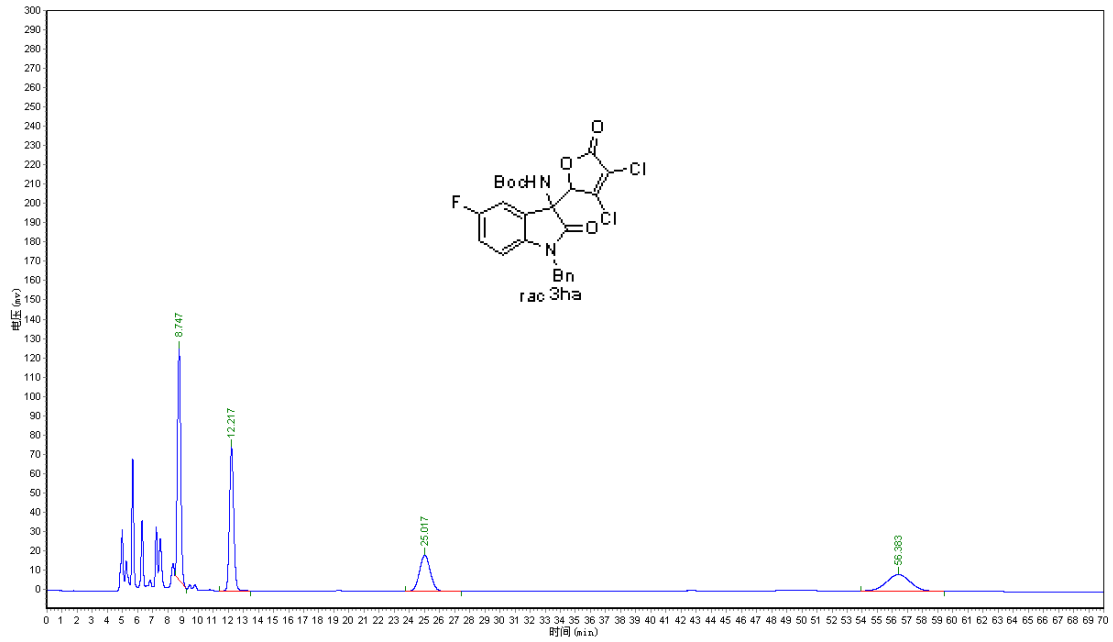

| Peak | RT(min.) | Height(mV*sec) | Area(mV)    | Area(%) |
|------|----------|----------------|-------------|---------|
| 1    | 8.747    | 119987.805     | 1843084.875 | 35.8413 |
| 2    | 12.217   | 74321.070      | 1452519.875 | 28.2463 |
| 3    | 25.017   | 18607.607      | 919573.813  | 17.8824 |
| 4    | 56.383   | 8493.208       | 927164.813  | 18.0300 |

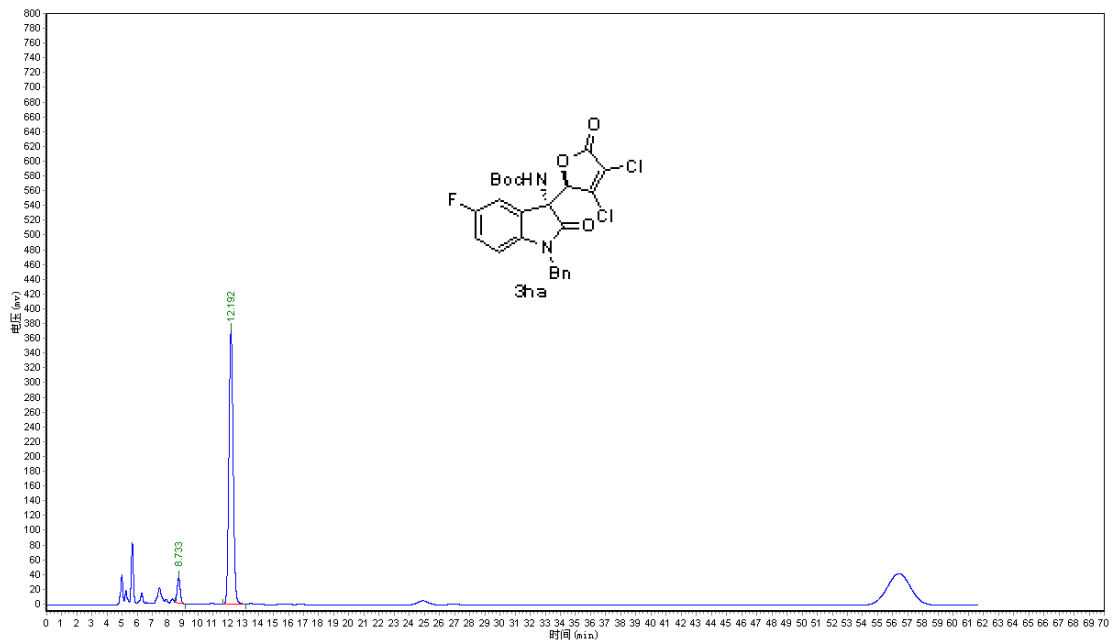

| Peak | RT(min.) | Height(mV*sec) | Area(mV)    | Area(%) |
|------|----------|----------------|-------------|---------|
| 1    | 8.733    | 33342.168      | 458198.375  | 5.9596  |
| 2    | 12.192   | 369725.531     | 7230147.500 | 94.0404 |

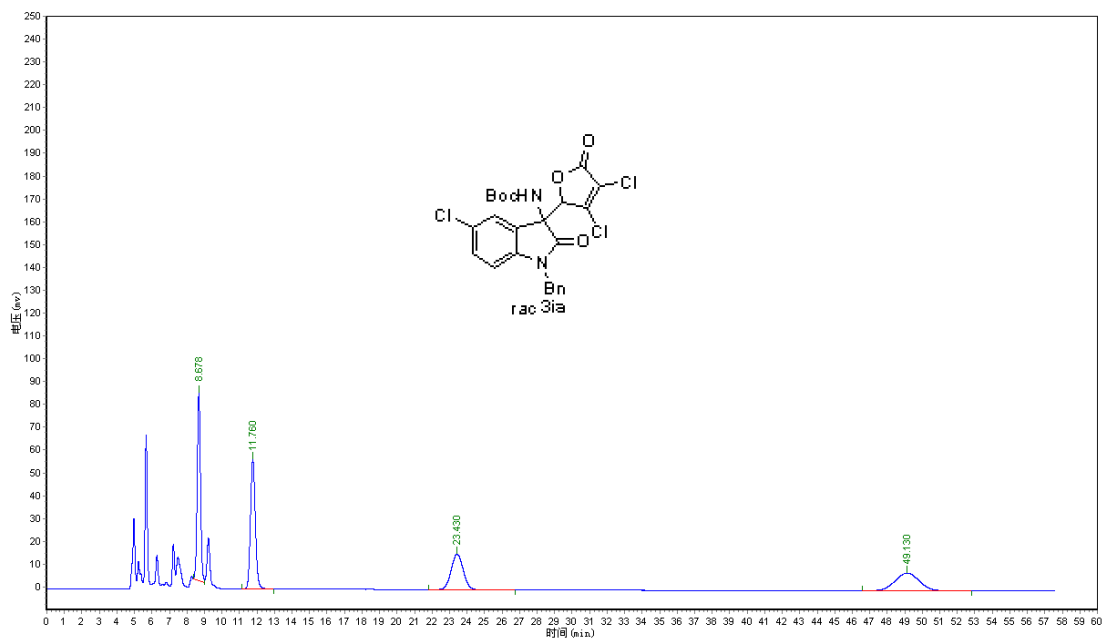

| Peak | RT(min.) | Height(mV*sec) | Area(mV)    | Area(%) |
|------|----------|----------------|-------------|---------|
| 1    | 8.678    | 81817.516      | 1061358.375 | 29.0225 |
| 2    | 11.760   | 56548.359      | 1100477.875 | 30.0922 |
| 3    | 23.430   | 15573.232      | 745448.875  | 20.3841 |
| 4    | 49.130   | 7731.106       | 749734.000  | 20.5012 |

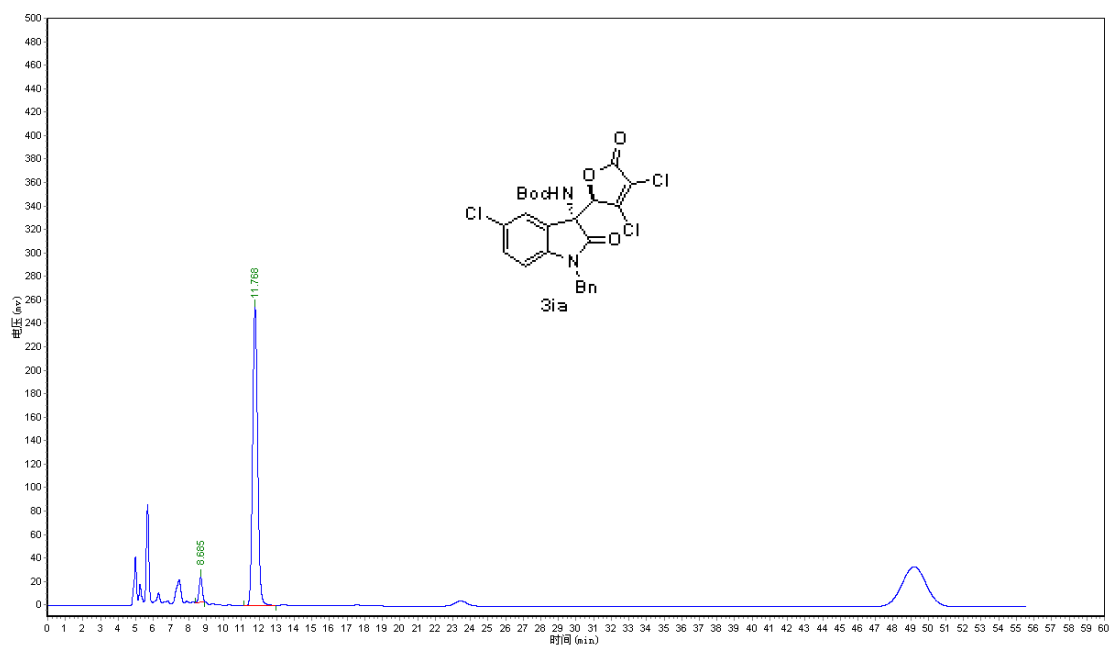

| Peak | RT(min.) | Height(mV*sec) | Area(mV)    | Area(%) |
|------|----------|----------------|-------------|---------|
| 1    | 8.685    | 21536.572      | 267291.750  | 5.0843  |
| 2    | 11.768   | 254040.563     | 4989902.000 | 94.9157 |

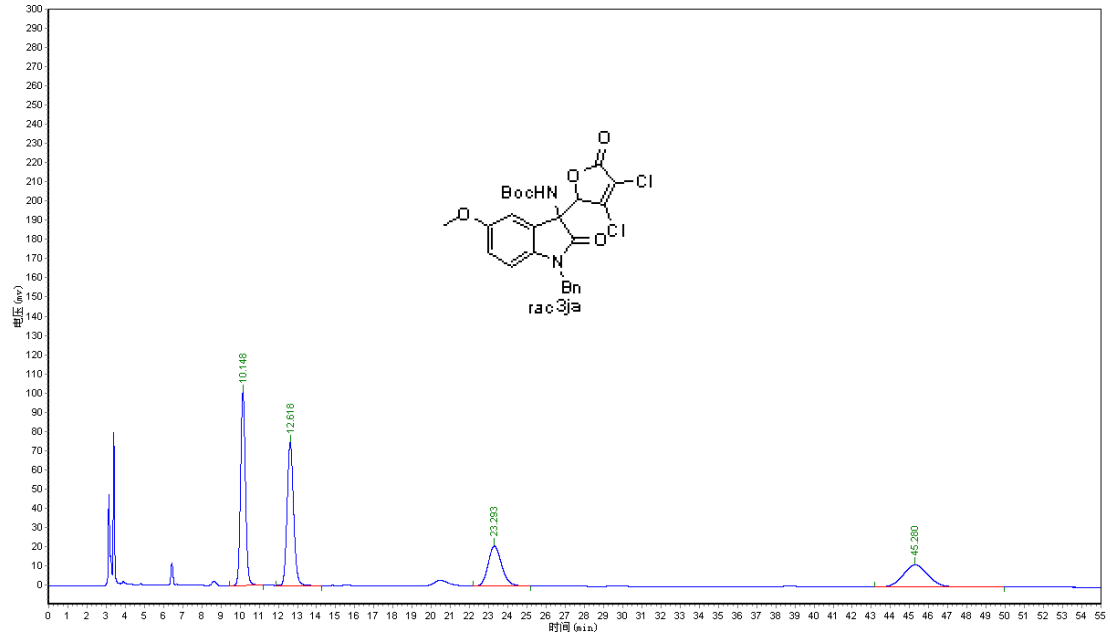

| Peak | RT(min.) | Height(mV*sec) | Area(mV)    | Area(%) |
|------|----------|----------------|-------------|---------|
| 1    | 10.148   | 100755.367     | 1790111.875 | 31.9635 |
| 2    | 12.618   | 74641.328      | 1760507.875 | 31.4349 |
| 3    | 23.293   | 20839.744      | 1019915.125 | 18.2112 |
| 4    | 45.280   | 11431.326      | 1029952.625 | 18.3904 |

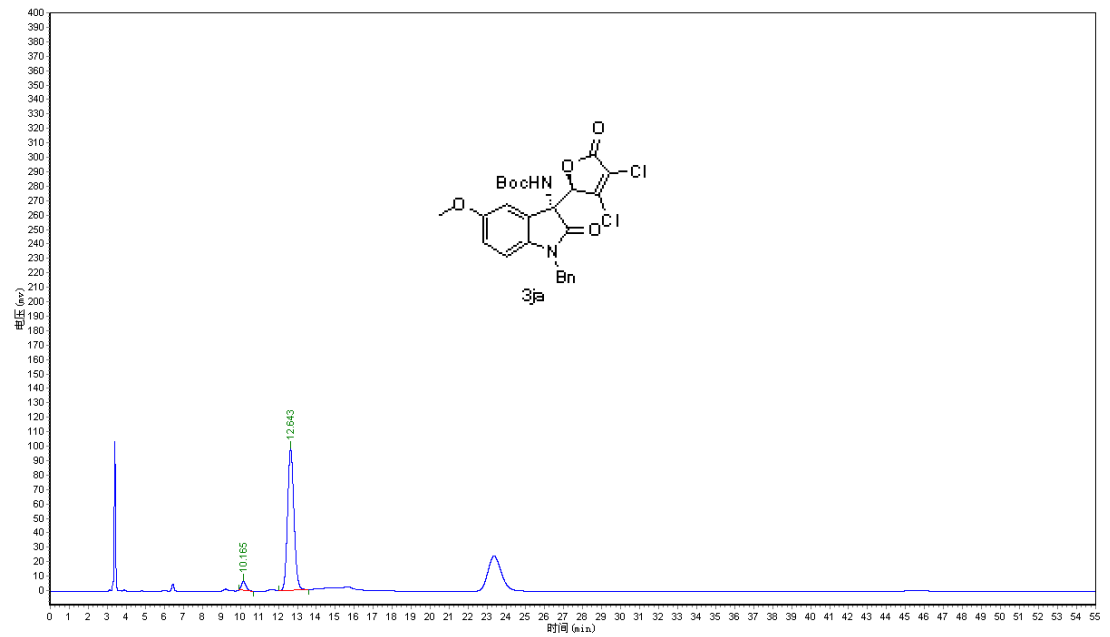

| Peak | RT(min.) | Height(mV*sec) | Area(mV)    | Area(%) |
|------|----------|----------------|-------------|---------|
| 1    | 10.165   | 6051.625       | 99907.102   | 4.1814  |
| 2    | 12.643   | 97895.477      | 2289425.250 | 95.8186 |

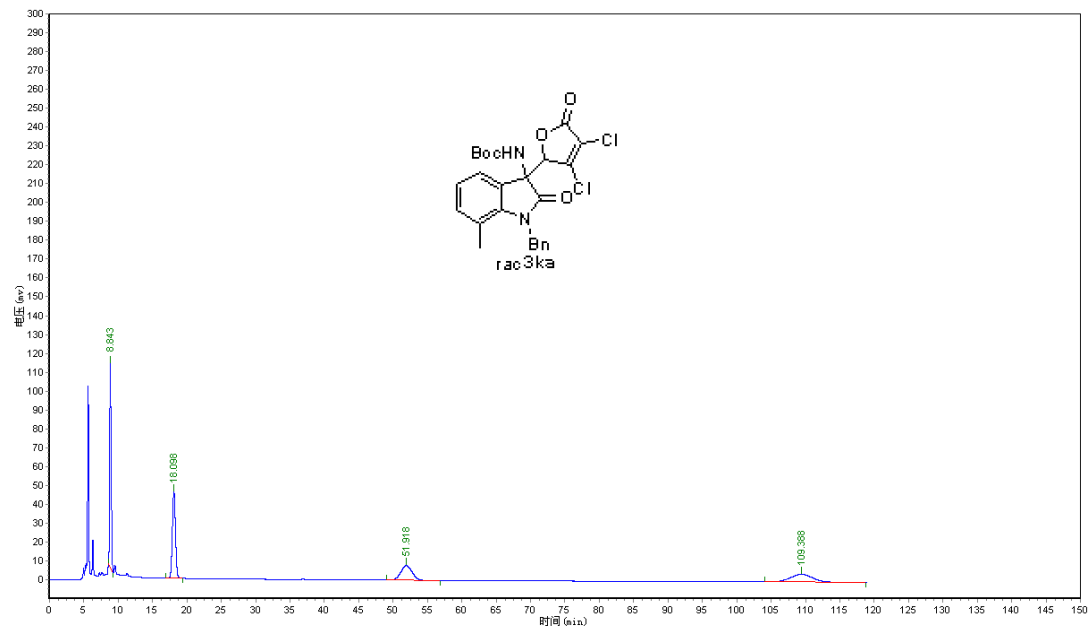

| Peak | RT(min.) | Height(mV*sec) | Area(mV)    | Area(%) |
|------|----------|----------------|-------------|---------|
| 1    | 8.843    | 107775.172     | 1635492.375 | 33.4401 |
| 2    | 18.098   | 46021.691      | 1466626.375 | 29.9874 |
| 3    | 51.918   | 7703.782       | 885215.500  | 18.0995 |
| 4    | 109.388  | 4033.082       | 903481.750  | 18.4730 |

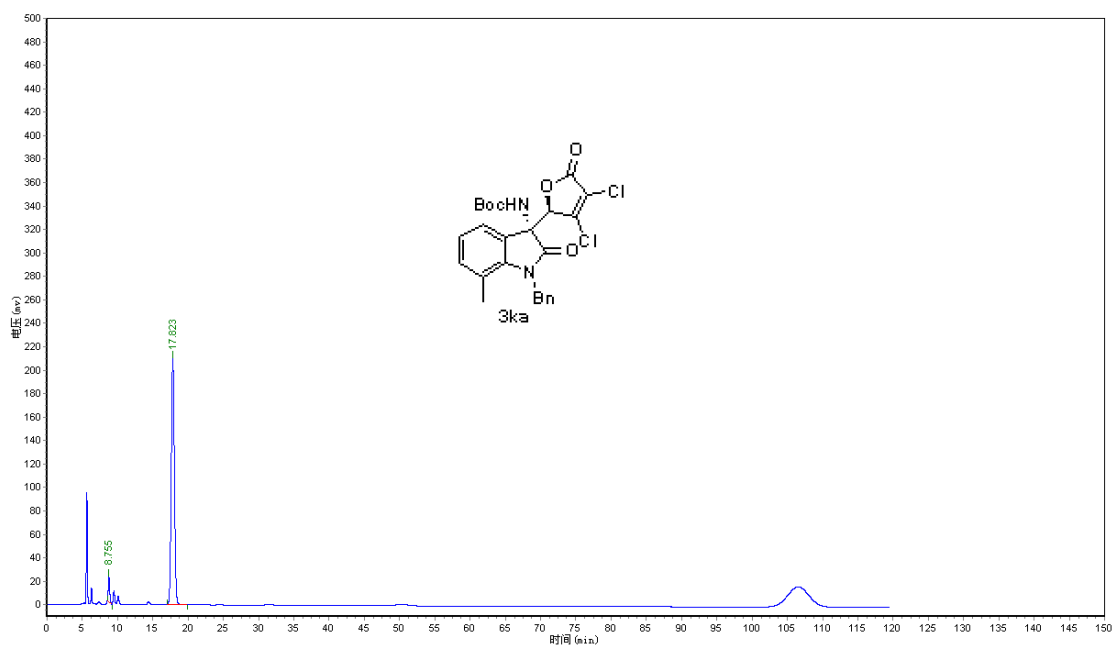

| Peak | RT(min.) | Height(mV*sec) | Area(mV)    | Area(%) |
|------|----------|----------------|-------------|---------|
| 1    | 8.755    | 21003.699      | 292806.719  | 4.3242  |
| 2    | 17.823   | 209524.156     | 6478598.500 | 95.6758 |

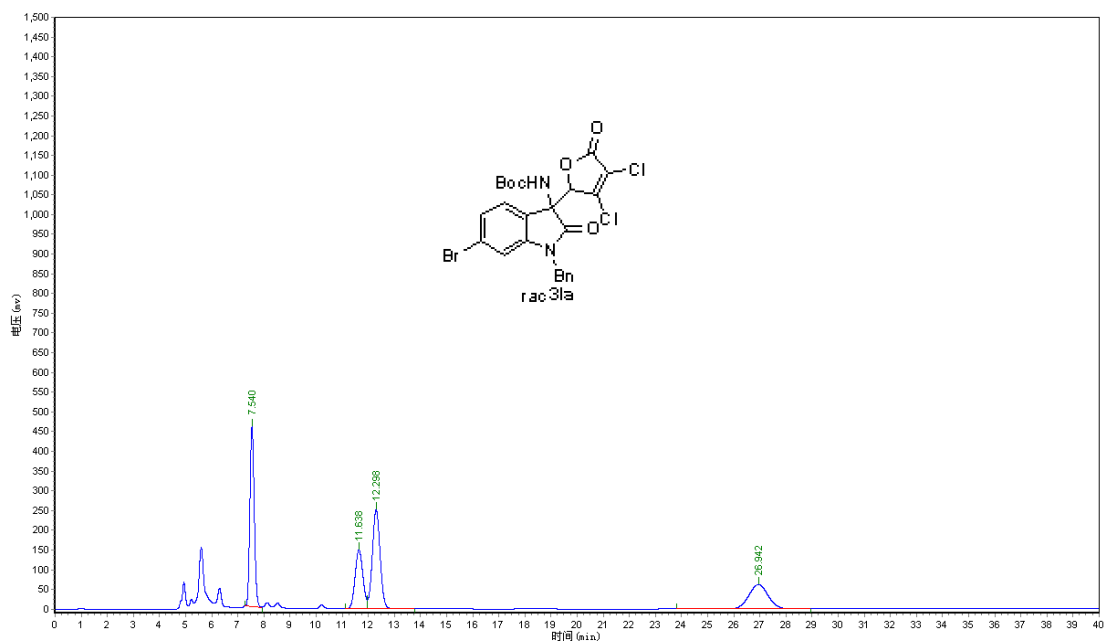

| Peak | RT(min.) | Height(mV*sec) | Area(mV)    | Area(%) |
|------|----------|----------------|-------------|---------|
| 1    | 7.540    | 455120.813     | 5289743.000 | 31.5455 |
| 2    | 11.638   | 149738.891     | 3108366.250 | 18.5368 |
| 3    | 12.298   | 251356.031     | 5207160.000 | 31.0530 |
| 4    | 26.942   | 61417.141      | 3163343.750 | 18.8647 |

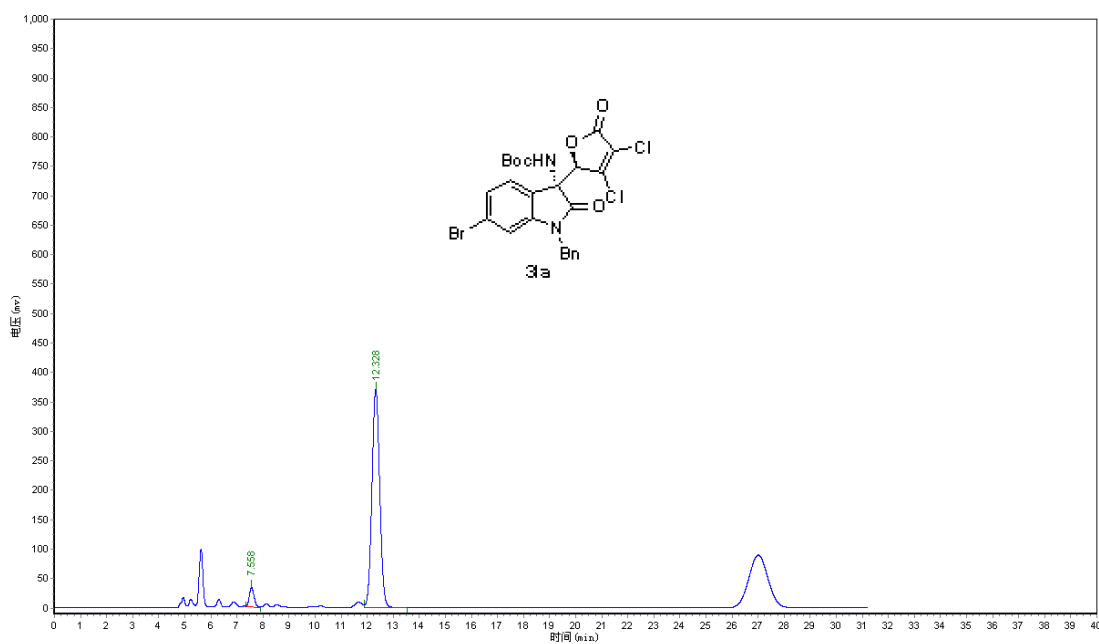

| Peak | RT(min.) | Height(mV*sec) | Area(mV)    | Area(%) |
|------|----------|----------------|-------------|---------|
| 1    | 7.558    | 33462.934      | 423780.781  | 5.2207  |
| 2    | 12.328   | 371222.406     | 7693605.000 | 94.7793 |

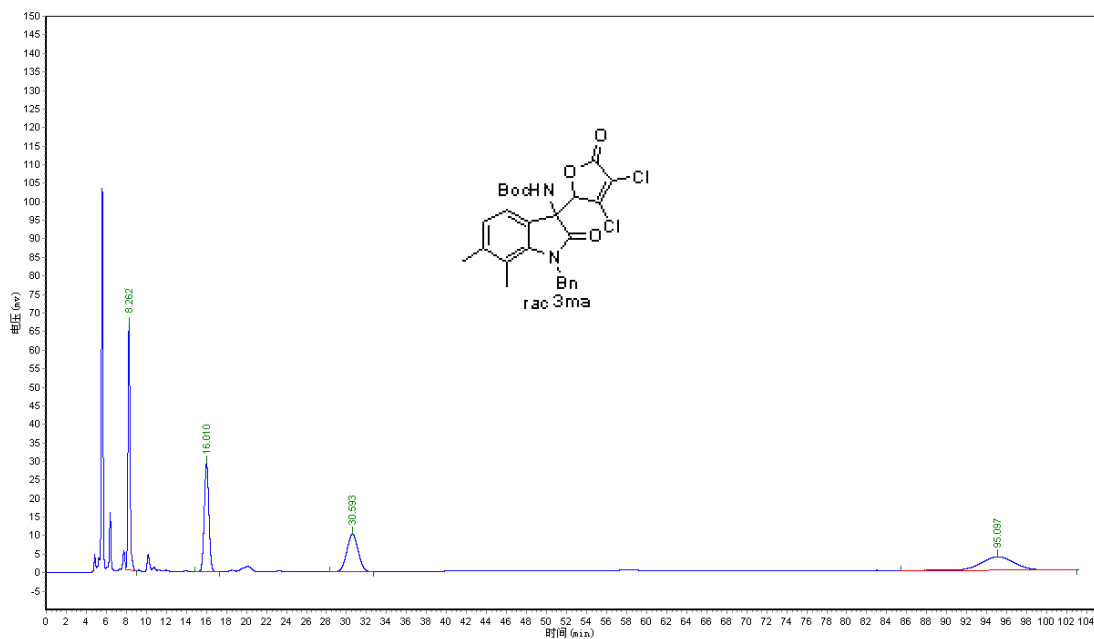

| Peak | RT(min.) | Height(mV*sec) | Area(mV)   | Area(%) |
|------|----------|----------------|------------|---------|
| 1    | 8.262    | 66198.578      | 965588.813 | 27.4582 |
| 2    | 16.010   | 29247.000      | 938467.688 | 26.6869 |
| 3    | 30.593   | 10093.351      | 795739.000 | 22.6282 |
| 4    | 95.097   | 3577.837       | 816787.875 | 23.2267 |

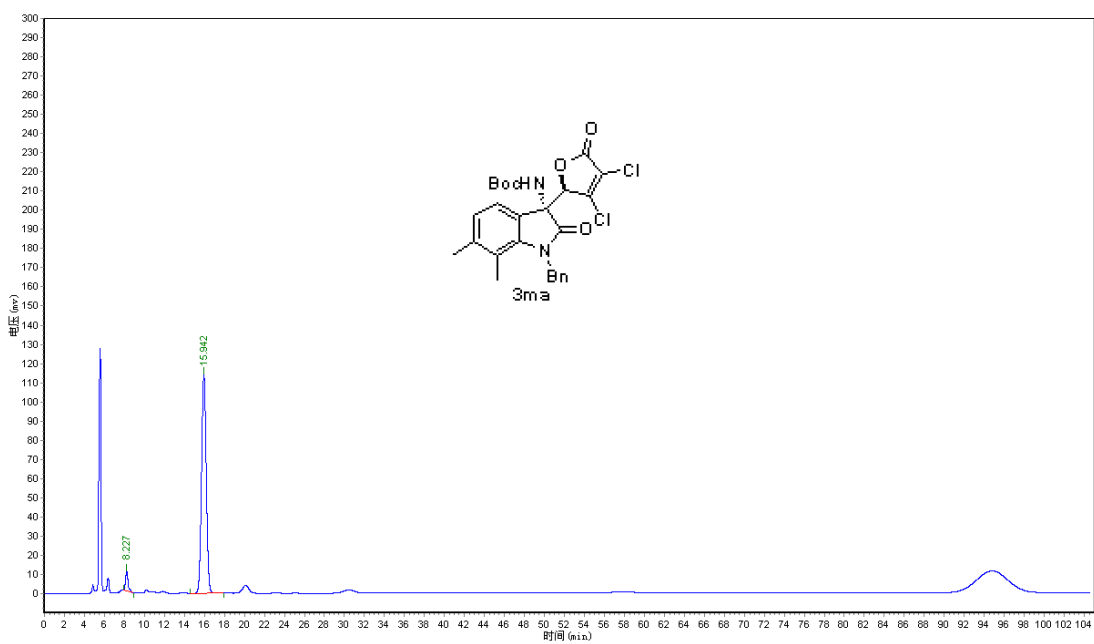

| Peak | RT(min.) | Height(mV*sec) | Area(mV)    | Area(%) |
|------|----------|----------------|-------------|---------|
| 1    | 8.227    | 10234.311      | 185134.109  | 4.7166  |
| 2    | 15.942   | 113977.813     | 3740024.250 | 95.2834 |

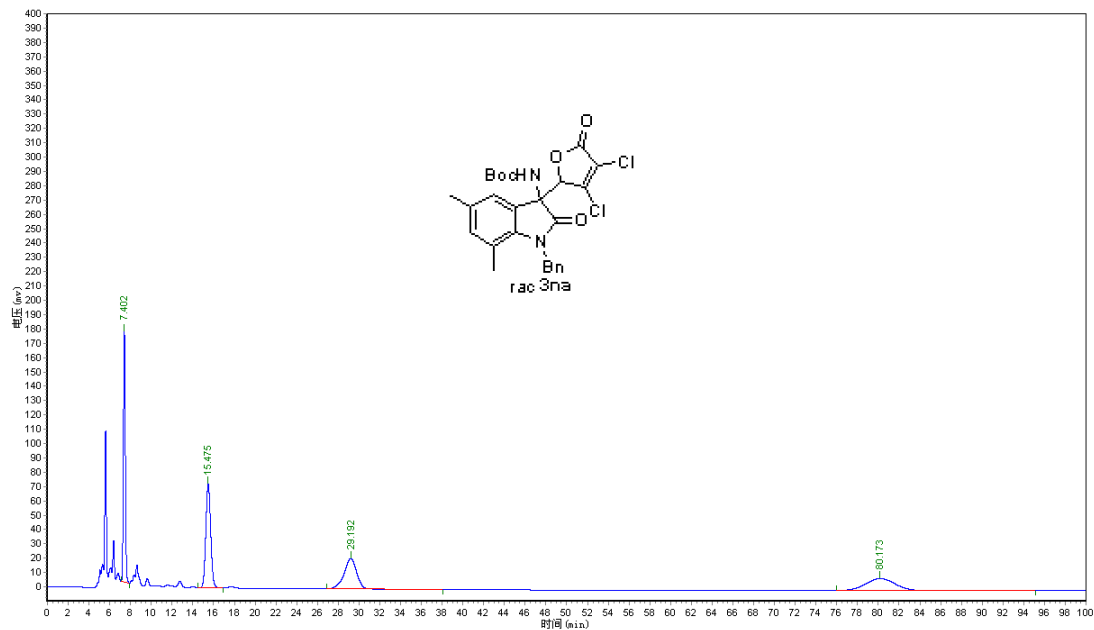

| Peak | RT(min.) | Height(mV*sec) | Area(mV)    | Area(%) |
|------|----------|----------------|-------------|---------|
| 1    | 7.402    | 174674.984     | 2251189.250 | 28.2268 |
| 2    | 15.475   | 72535.984      | 2368942.500 | 29.7032 |
| 3    | 29.192   | 21141.666      | 1770262.375 | 22.1966 |
| 4    | 80.173   | 8230.957       | 1584979.625 | 19.8734 |

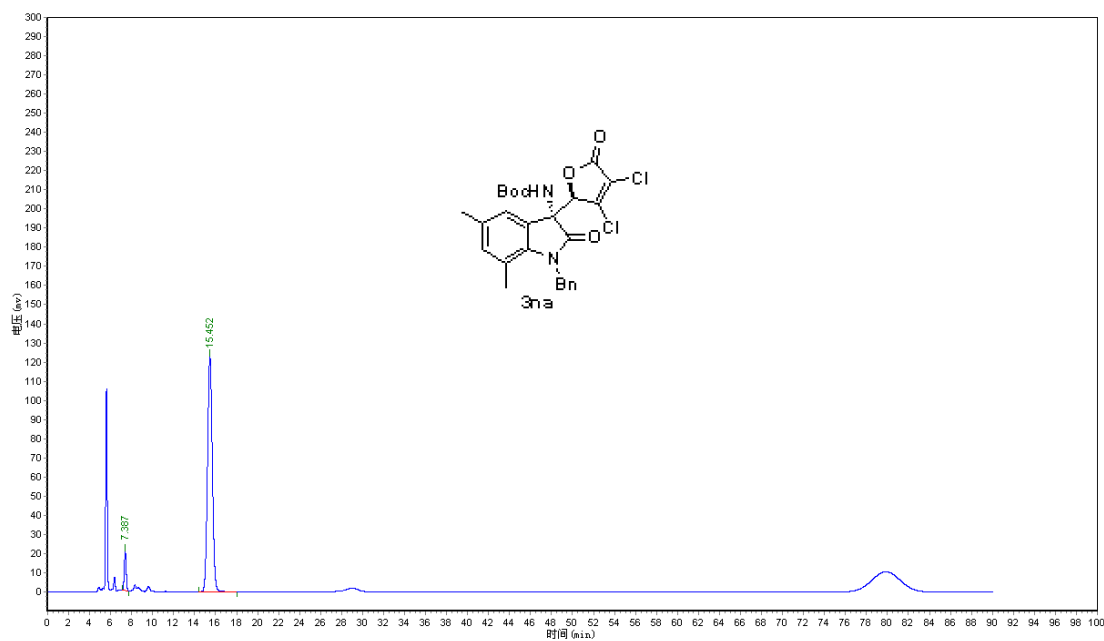

| Peak | RT(min.) | Height(mV*sec) | Area(mV)    | Area(%) |
|------|----------|----------------|-------------|---------|
| 1    | 7.387    | 20375.834      | 262114.156  | 6.2867  |
| 2    | 15.452   | 122590.844     | 3907221.750 | 93.7133 |

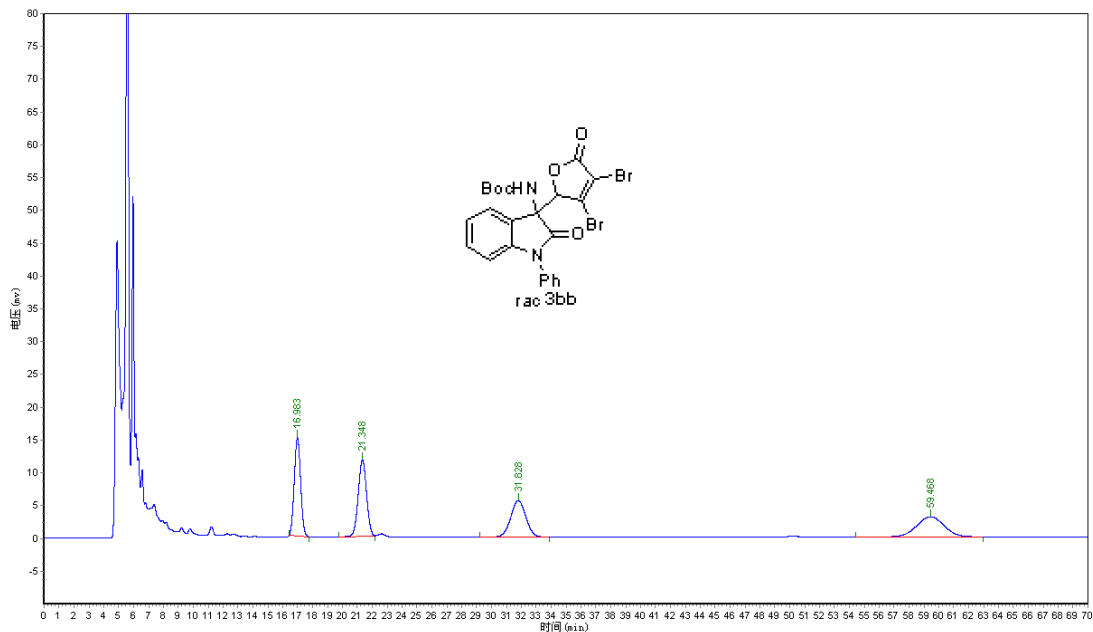

| Peak | RT(min.) | Height(mV*sec) | Area(mV)   | Area(%) |
|------|----------|----------------|------------|---------|
| 1    | 16.983   | 14988.339      | 443282.938 | 26.2463 |
| 2    | 21.348   | 11748.357      | 466230.594 | 27.6050 |
| 3    | 31.828   | 5535.136       | 391288.188 | 23.1677 |
| 4    | 59.468   | 3057.458       | 388135.000 | 22.9810 |

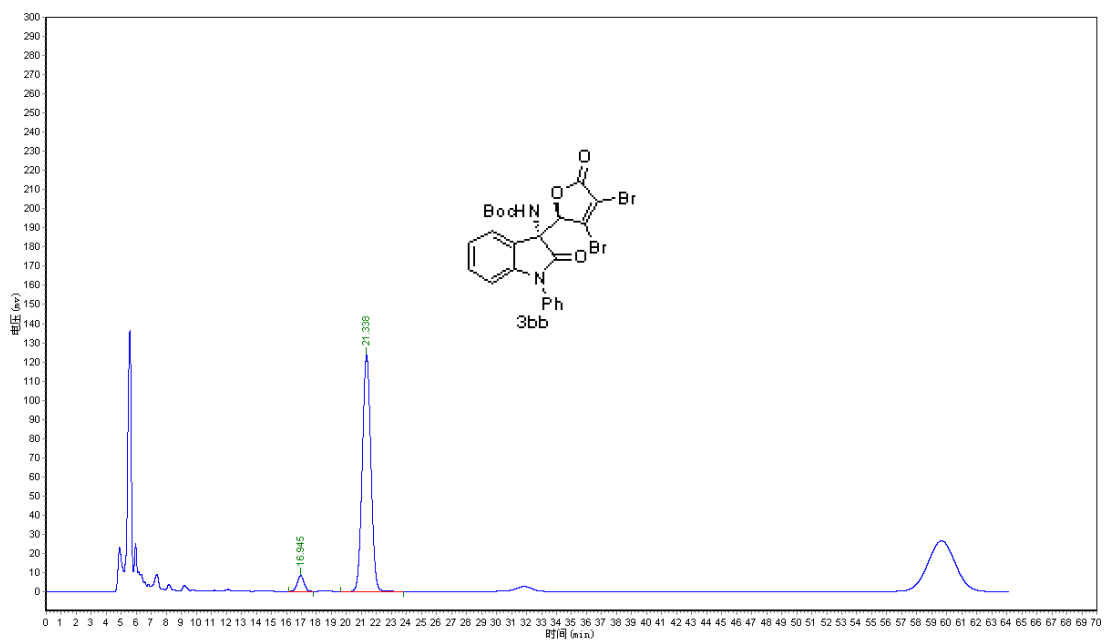

| Peak | RT(min.) | Height(mV*sec) | Area(mV)    | Area(%) |
|------|----------|----------------|-------------|---------|
| 1    | 16.945   | 8250.203       | 259722.203  | 5.0125  |
| 2    | 21.338   | 123340.875     | 4921746.000 | 94.9875 |



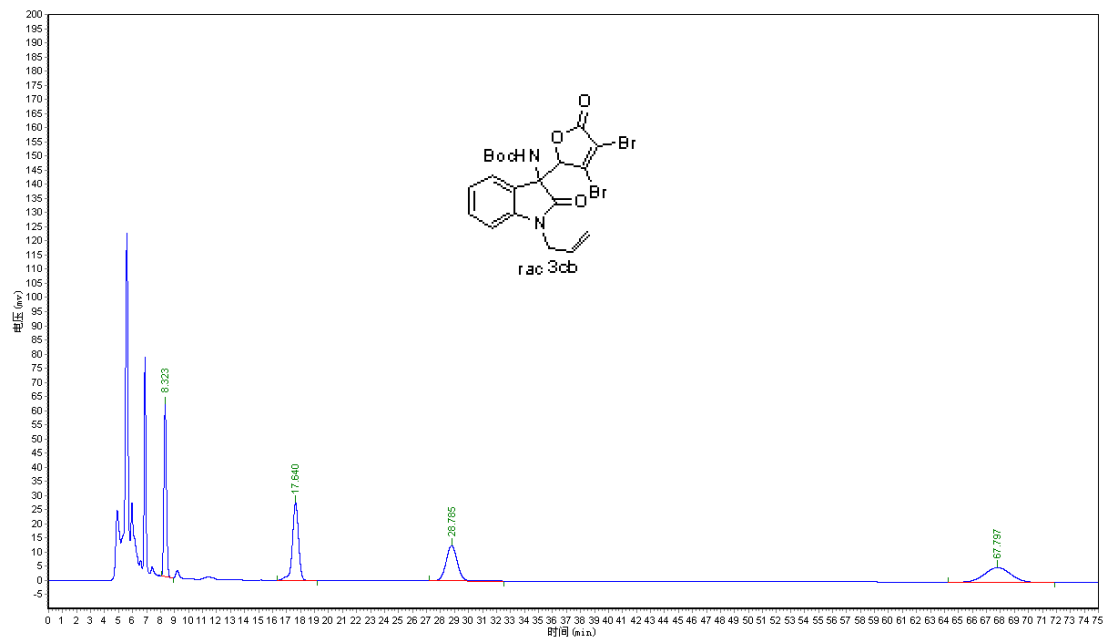

| Peak | RT(min.) | Height(mV*sec) | Area(mV)   | Area(%) |
|------|----------|----------------|------------|---------|
| 1    | 8.323    | 60729.602      | 773248.563 | 26.0862 |
| 2    | 17.640   | 27461.416      | 833979.625 | 28.1350 |
| 3    | 28.785   | 12409.807      | 682052.375 | 23.0096 |
| 4    | 67.797   | 5184.129       | 674929.938 | 22.7693 |

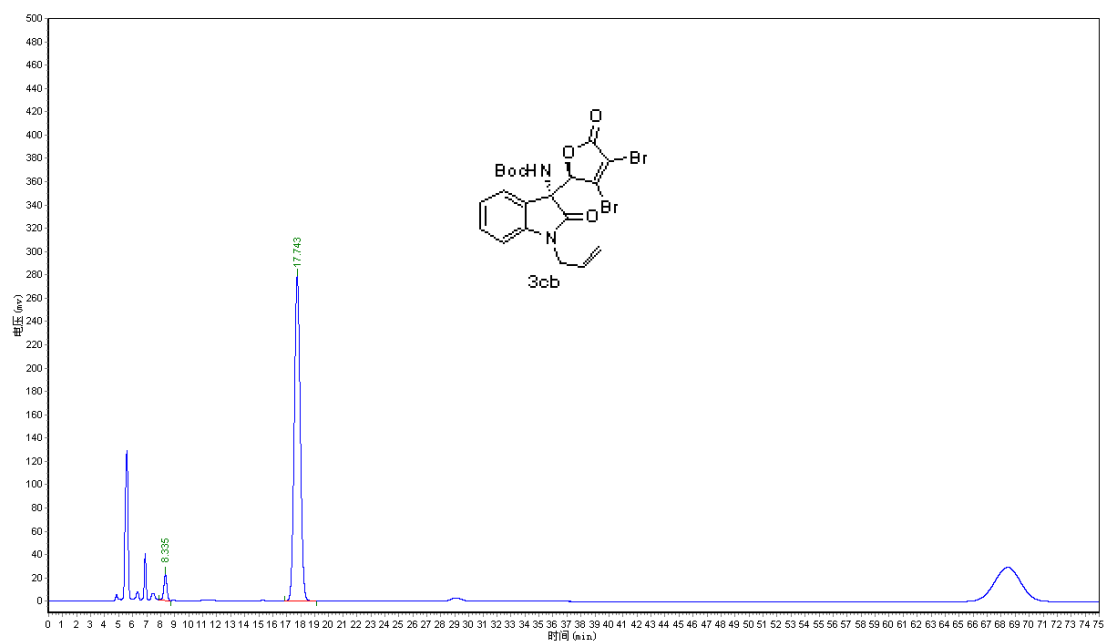

| Peak | RT(min.) | Height(mV*sec) | Area(mV)    | Area(%) |
|------|----------|----------------|-------------|---------|
| 1    | 8.335    | 22374.381      | 343851.563  | 3.9716  |
| 2    | 17.743   | 278624.813     | 8313929.500 | 96.0284 |

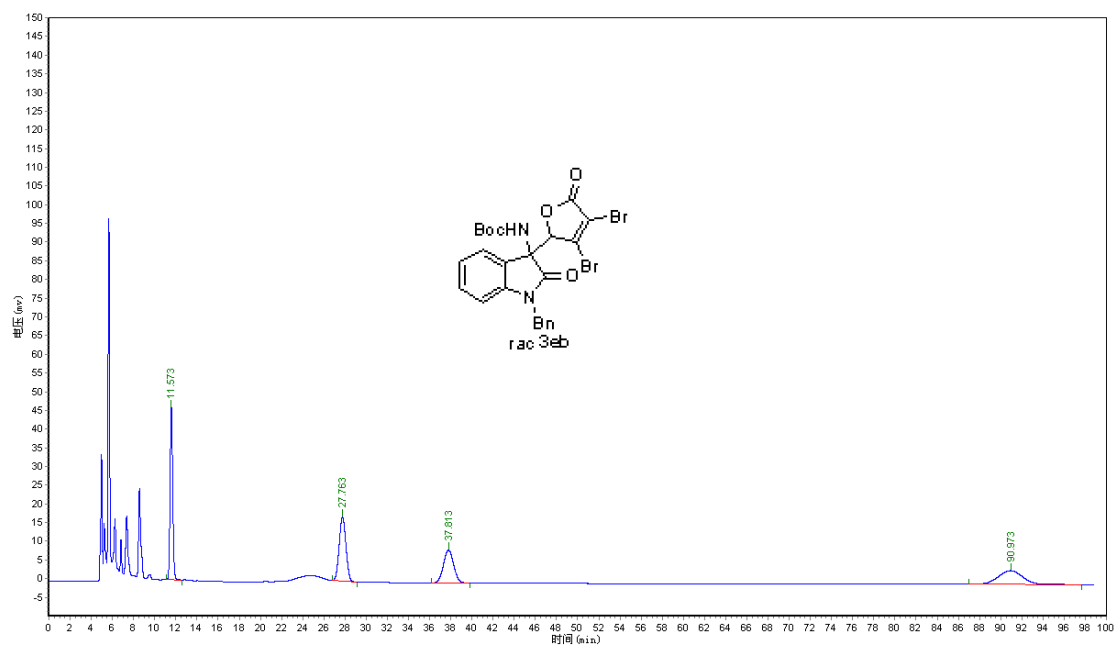

| Peak | RT(min.) | Height(mV*sec) | Area(mV)   | Area(%) |
|------|----------|----------------|------------|---------|
| 1    | 11.573   | 45891.070      | 791839.813 | 28.9424 |
| 2    | 27.763   | 17094.932      | 761633.313 | 27.8383 |
| 3    | 37.813   | 8806.108       | 585391.375 | 21.3965 |
| 4    | 90.973   | 3684.217       | 597053.750 | 21.8228 |

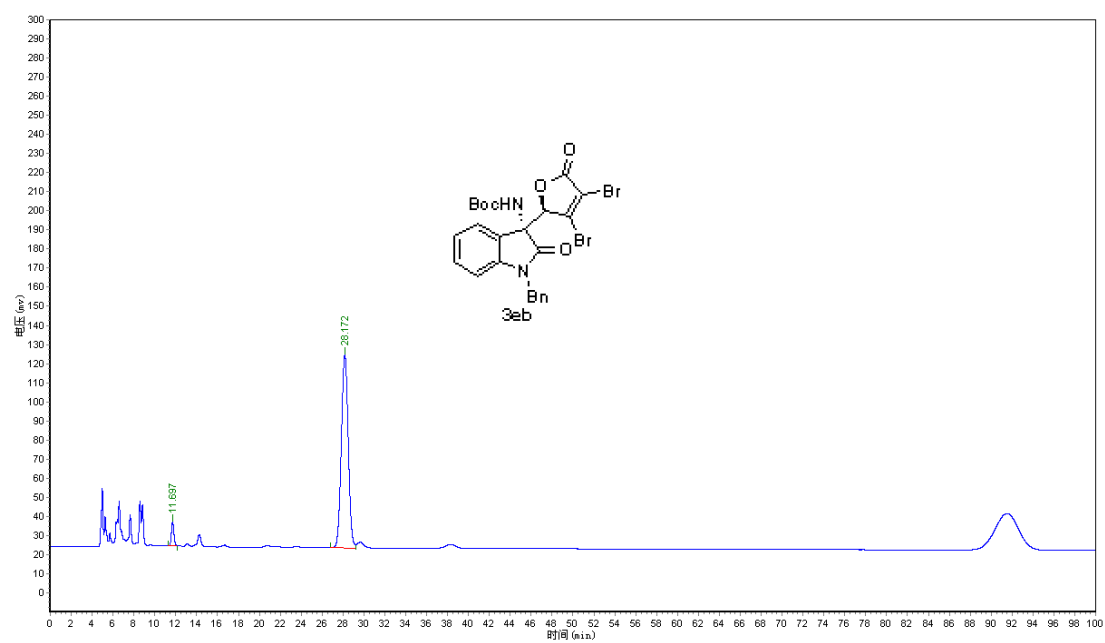

| Peak | RT(min.) | Height(mV*sec) | Area(mV)    | Area(%) |
|------|----------|----------------|-------------|---------|
| 1    | 11.697   | 12397.798      | 206235.922  | 4.2649  |
| 2    | 28.172   | 101026.539     | 4629456.000 | 95.7351 |

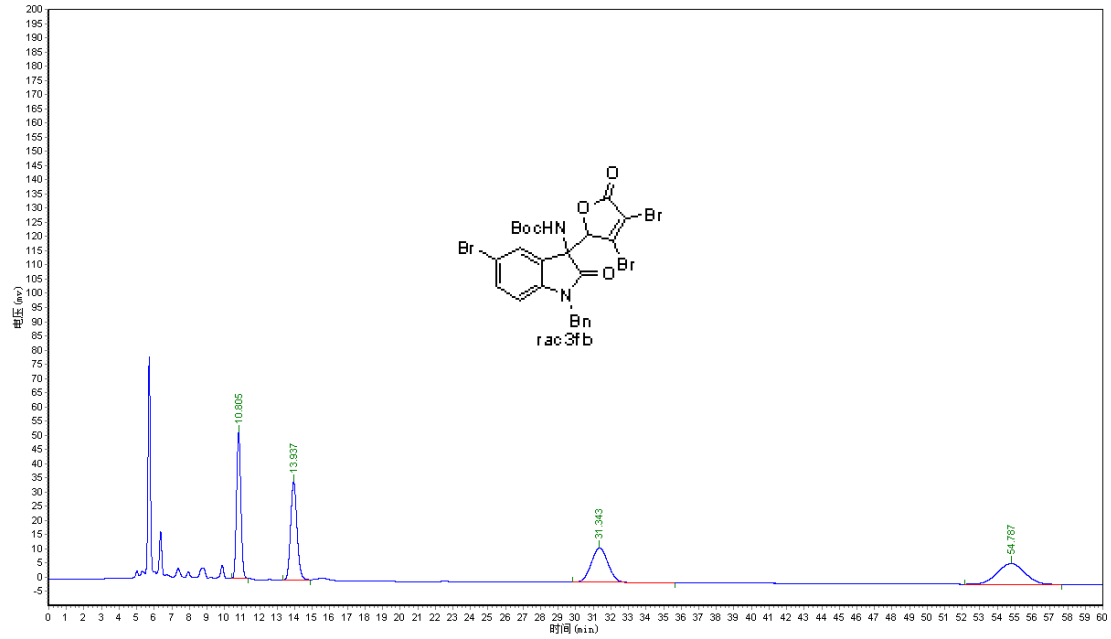

| Peak | RT(min.) | Height(mV*sec) | Area(mV)   | Area(%) |
|------|----------|----------------|------------|---------|
| 1    | 10.805   | 51428.246      | 881109.750 | 26.2670 |
| 2    | 13.937   | 34580.285      | 876928.813 | 26.1423 |
| 3    | 31.343   | 12107.016      | 806777.688 | 24.0511 |
| 4    | 54.787   | 7281.546       | 789622.125 | 23.5396 |

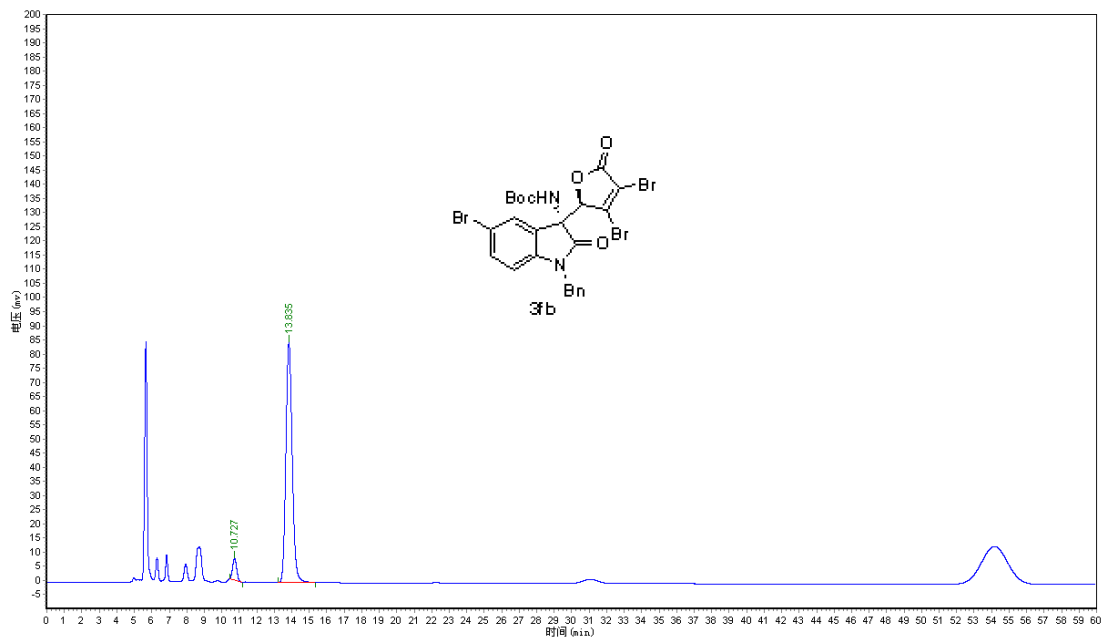

| Peak | RT(min.) | Height(mV*sec) | Area(mV)    | Area(%) |
|------|----------|----------------|-------------|---------|
| 1    | 10.727   | 7568.125       | 118541.406  | 5.2823  |
| 2    | 13.835   | 84612.594      | 2125563.000 | 94.7177 |

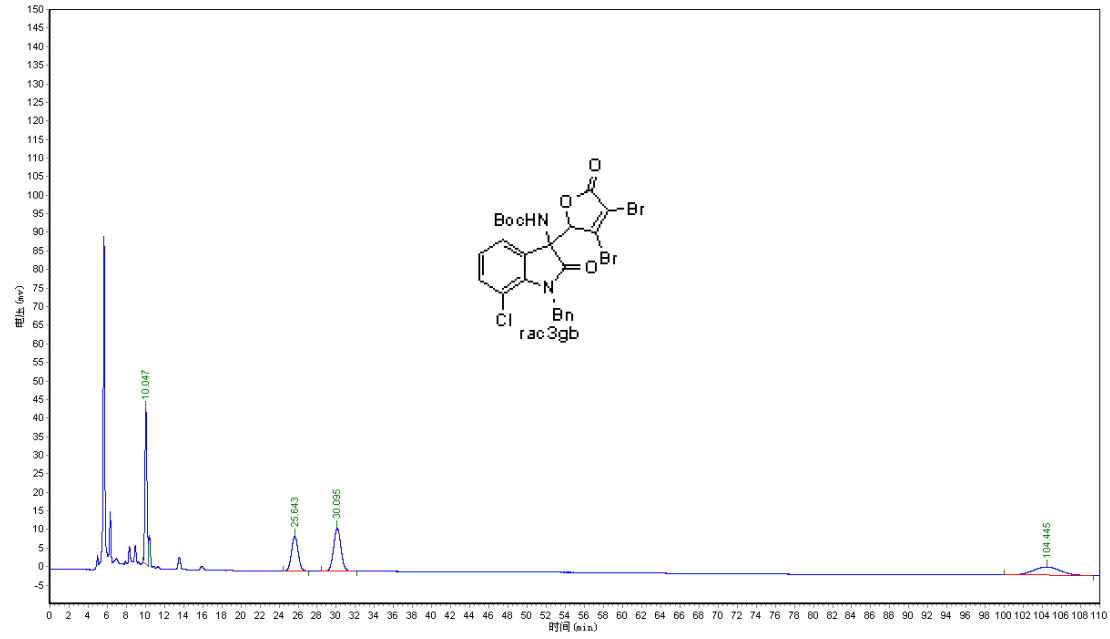

| Peak | RT(min.) | Height(mV*sec) | Area(mV)   | Area(%) |
|------|----------|----------------|------------|---------|
| 1    | 10.047   | 41847.223      | 635664.688 | 29.7358 |
| 2    | 25.643   | 9306.414       | 443756.438 | 20.7585 |
| 3    | 30.095   | 11551.470      | 616073.125 | 28.8193 |
| 4    | 104.445  | 2210.926       | 442217.000 | 20.6865 |

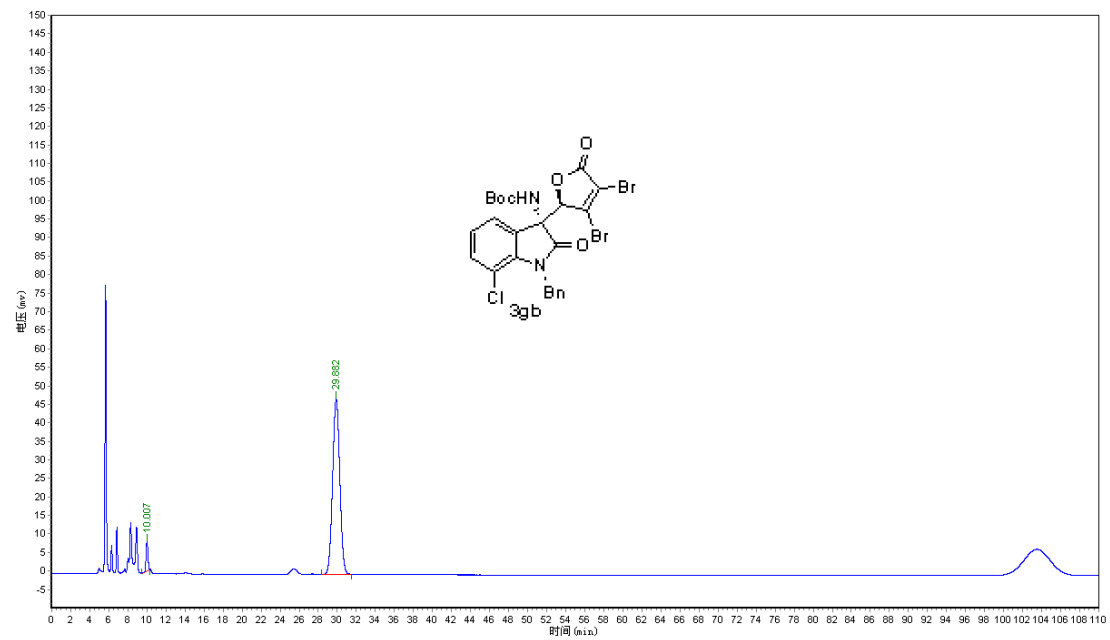

| Peak | RT(min.) | Height(mV*sec) | Area(mV)    | Area(%) |
|------|----------|----------------|-------------|---------|
| 1    | 10.007   | 7981.455       | 107096.500  | 4.1231  |
| 2    | 29.882   | 47312.941      | 2490374.000 | 95.8769 |

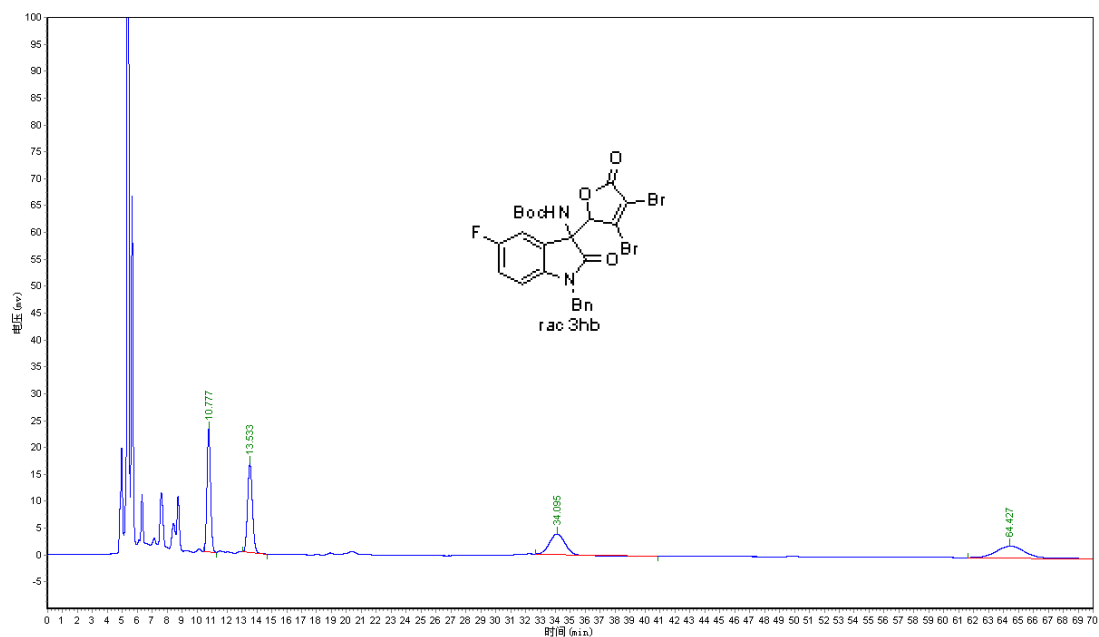

| Peak | RT(min.) | Height(mV*sec) | Area(mV)   | Area(%) |
|------|----------|----------------|------------|---------|
| 1    | 10.777   | 22769.932      | 382220.250 | 29.7858 |
| 2    | 13.533   | 16447.539      | 370783.469 | 28.8945 |
| 3    | 34.095   | 3796.958       | 247343.203 | 19.2750 |
| 4    | 64.427   | 2177.713       | 282883.813 | 22.0447 |

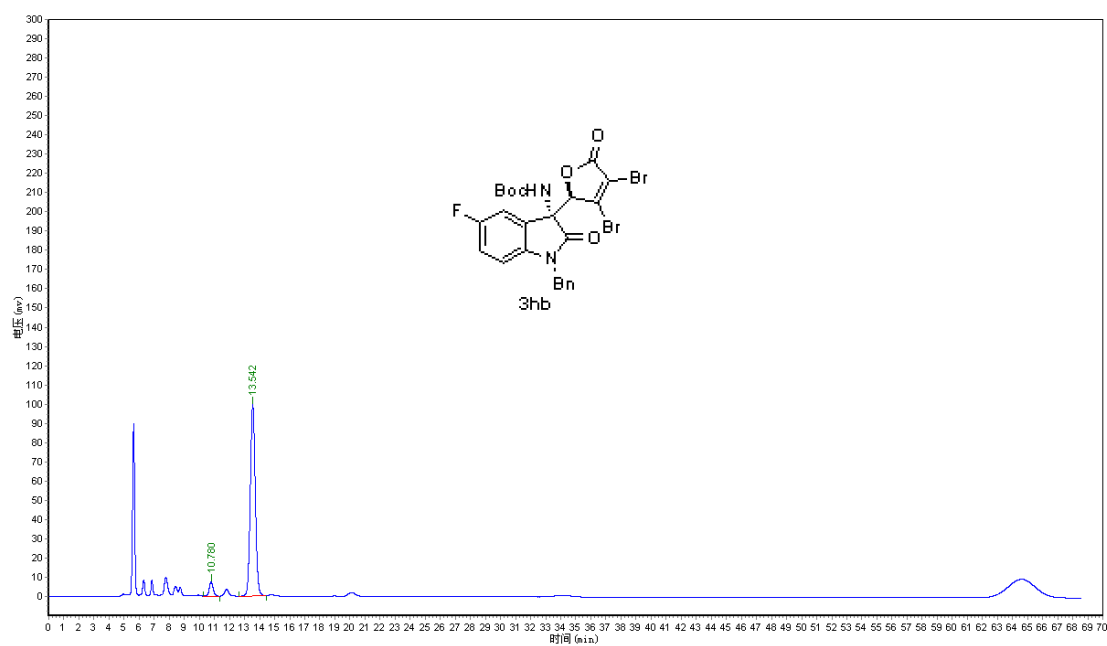

| Peak | RT(min.) | Height(mV*sec) | Area(mV)    | Area(%) |
|------|----------|----------------|-------------|---------|
| 1    | 10.780   | 7374.627       | 132133.594  | 5.4149  |
| 2    | 13.542   | 99420.219      | 2308045.750 | 94.5851 |

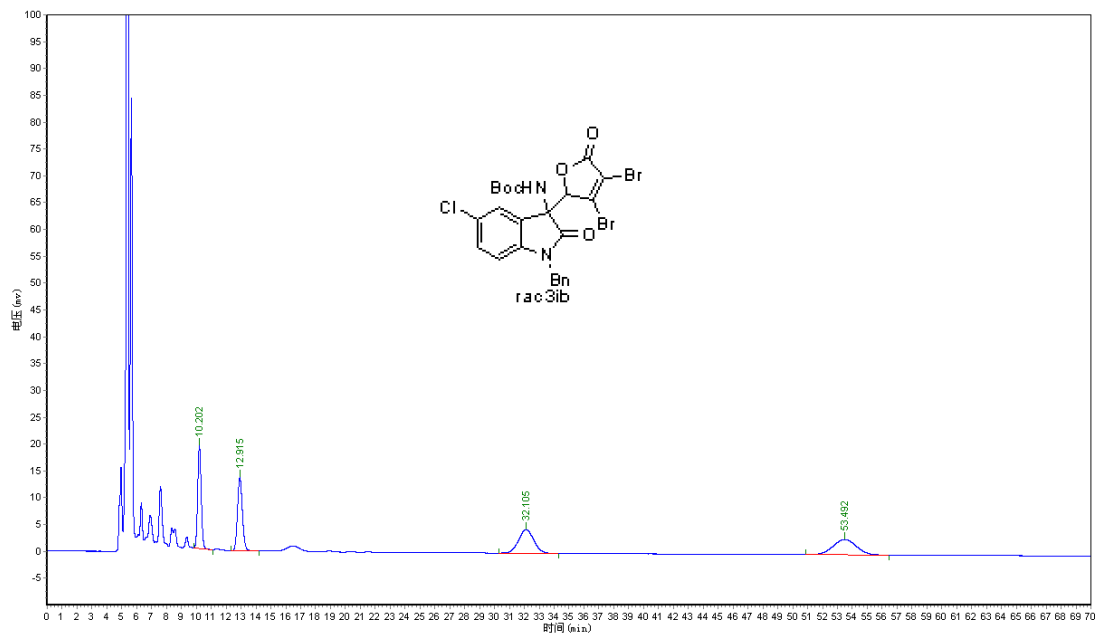

| Peak | RT(min.) | Height(mV*sec) | Area(mV)   | Area(%) |
|------|----------|----------------|------------|---------|
| 1    | 10.202   | 19115.482      | 318351.344 | 25.4320 |
| 2    | 12.915   | 13626.677      | 314105.531 | 25.0928 |
| 3    | 32.105   | 4368.990       | 310297.344 | 24.7885 |
| 4    | 53.492   | 2848.239       | 309022.719 | 24.6867 |

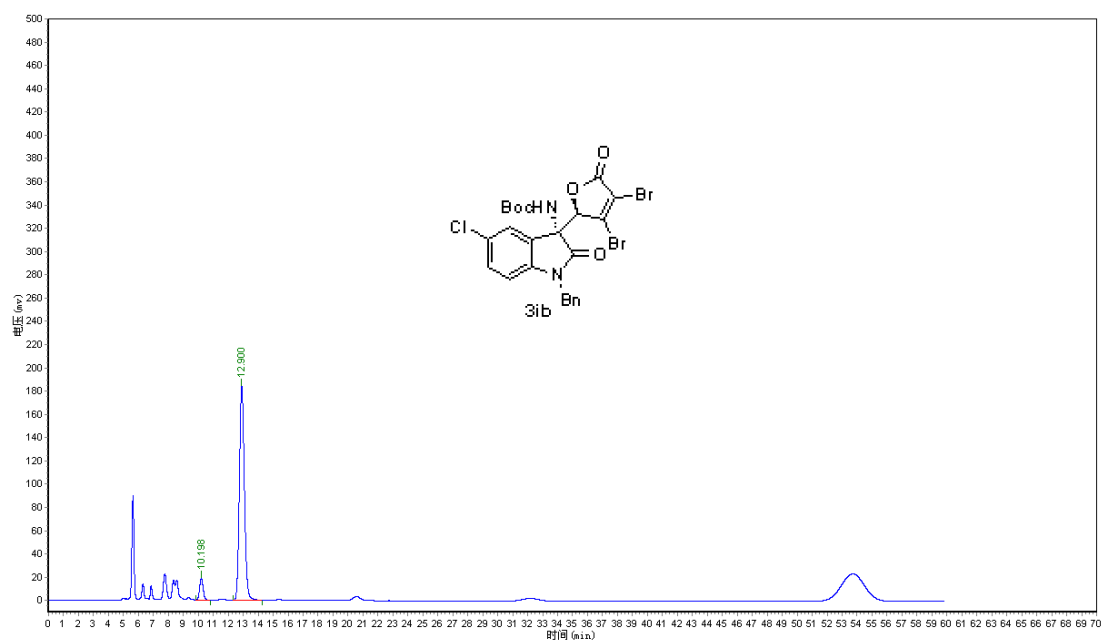

| Peak | RT(min.) | Height(mV*sec) | Area(mV)    | Area(%) |
|------|----------|----------------|-------------|---------|
| 1    | 10.198   | 18761.348      | 307689.375  | 6.7163  |
| 2    | 12.900   | 183749.000     | 4273513.500 | 93.2837 |

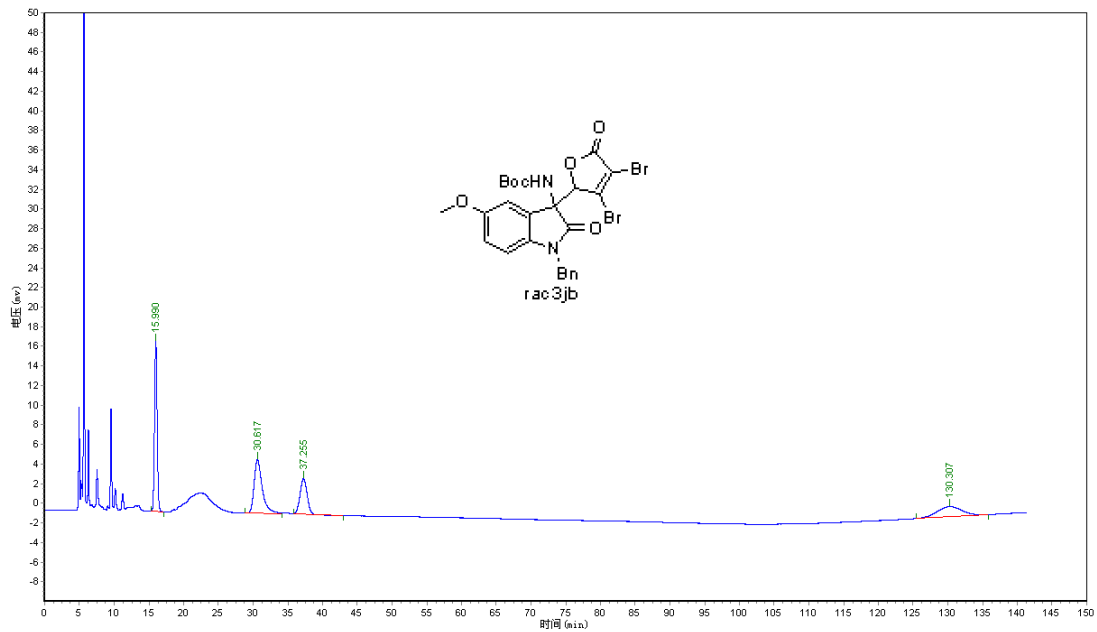

| Peak | RT(min.) | Height(mV*sec) | Area(mV)   | Area(%) |
|------|----------|----------------|------------|---------|
| 1    | 15.990   | 17404.861      | 459610.719 | 32.0390 |
| 2    | 30.617   | 5493.610       | 456100.531 | 31.7943 |
| 3    | 37.255   | 3637.689       | 258973.391 | 18.0528 |
| 4    | 130.307  | 1037.633       | 259849.500 | 18.1139 |

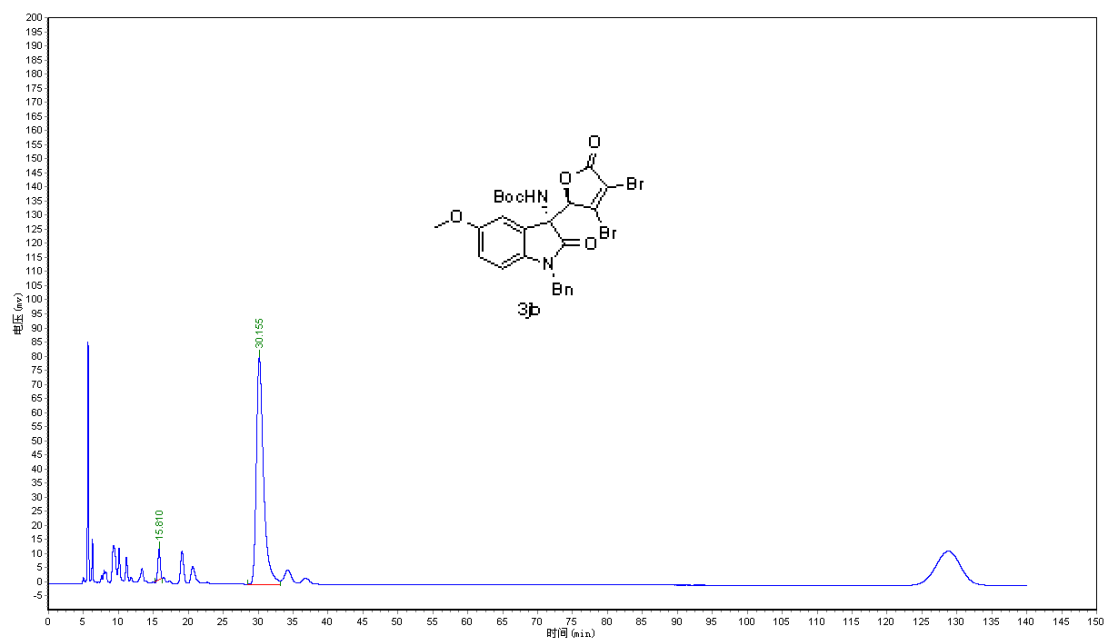

| Peak | RT(min.) | Height(mV*sec) | Area(mV)    | Area(%) |
|------|----------|----------------|-------------|---------|
| 1    | 15.810   | 10907.018      | 262422.906  | 4.3448  |
| 2    | 30.155   | 80527.727      | 5777490.000 | 95.6552 |

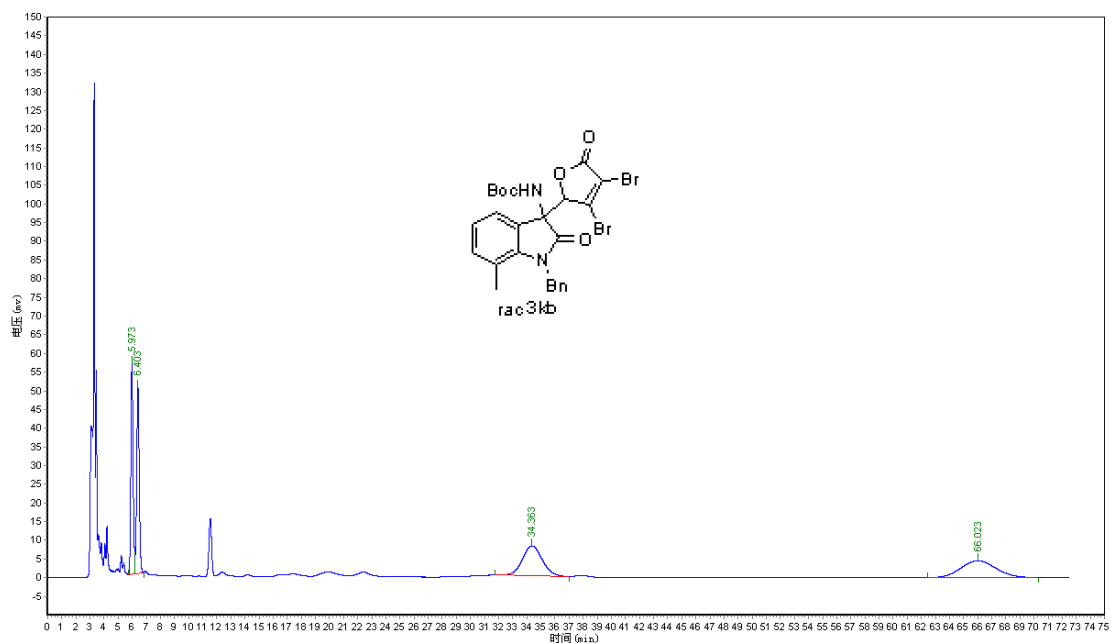

| Peak | RT(min.) | Height(mV*sec) | Area(mV)   | Area(%) |
|------|----------|----------------|------------|---------|
| 1    | 5.973    | 56446.207      | 628841.875 | 21.4980 |
| 2    | 6.403    | 50191.805      | 637902.063 | 21.8077 |
| 3    | 34.363   | 8275.669       | 873569.938 | 29.8644 |
| 4    | 66.023   | 4499.655       | 784807.063 | 26.8299 |

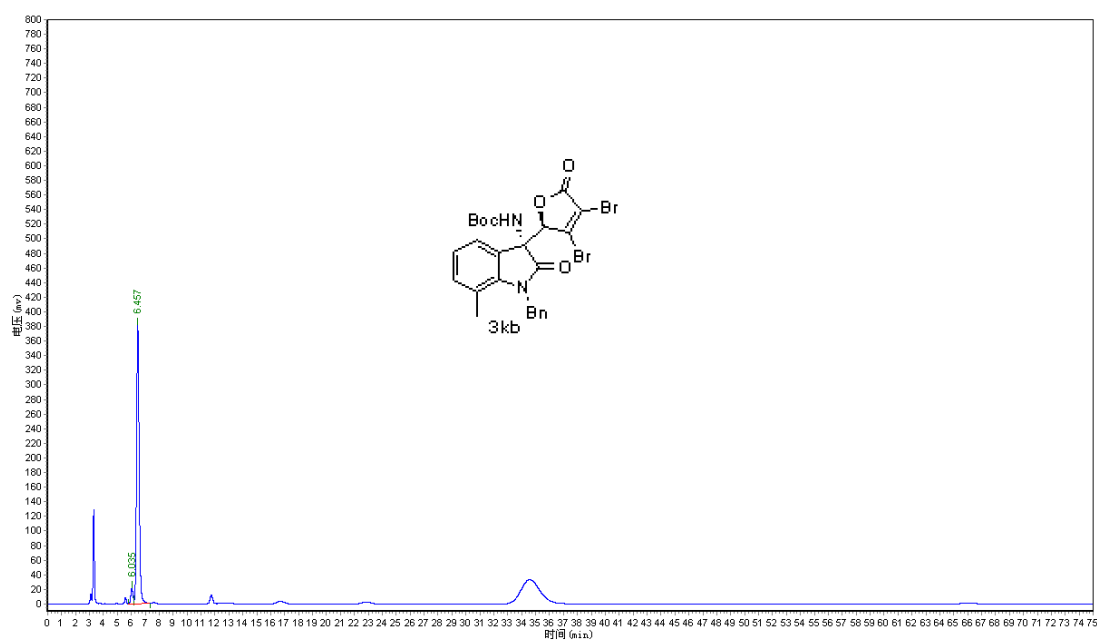

| Peak | RT(min.) | Height(mV*sec) | Area(mV)    | Area(%) |
|------|----------|----------------|-------------|---------|
| 1    | 6.035    | 20915.123      | 233090.297  | 4.4687  |
| 2    | 6.457    | 381159.969     | 4982919.500 | 95.5313 |



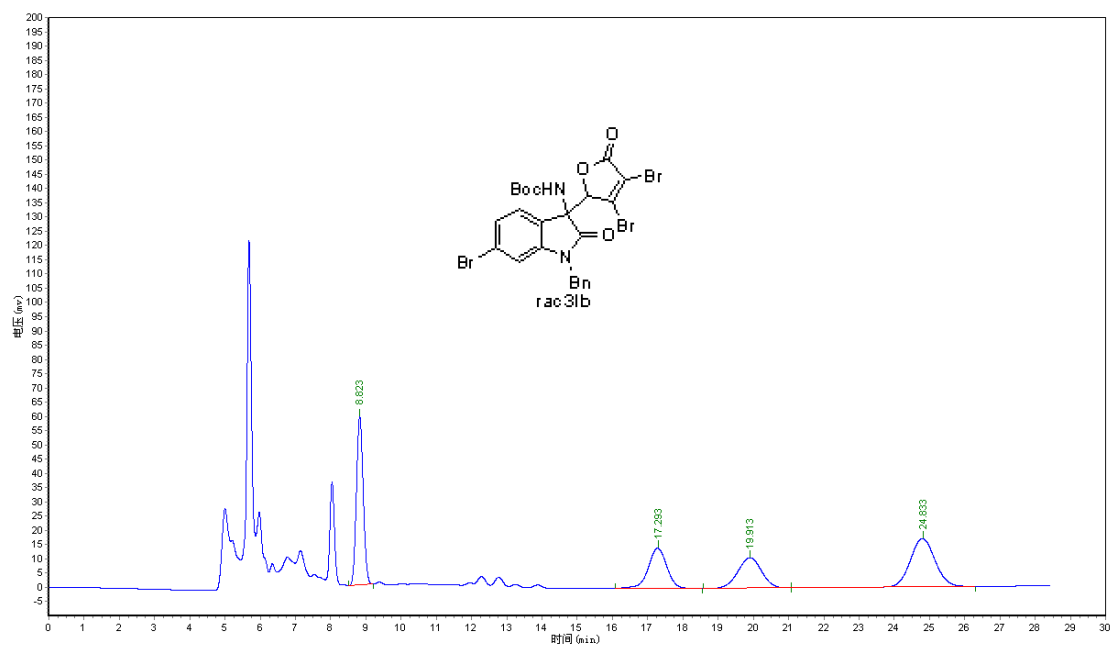

| Peak | RT(min.) | Height(mV*sec) | Area(mV)   | Area(%) |
|------|----------|----------------|------------|---------|
| 1    | 8.823    | 59255.160      | 800350.438 | 30.2949 |
| 2    | 17.293   | 14154.412      | 522517.906 | 19.7784 |
| 3    | 19.913   | 10648.048      | 495655.000 | 18.7616 |
| 4    | 24.833   | 16890.541      | 823338.188 | 31.1651 |

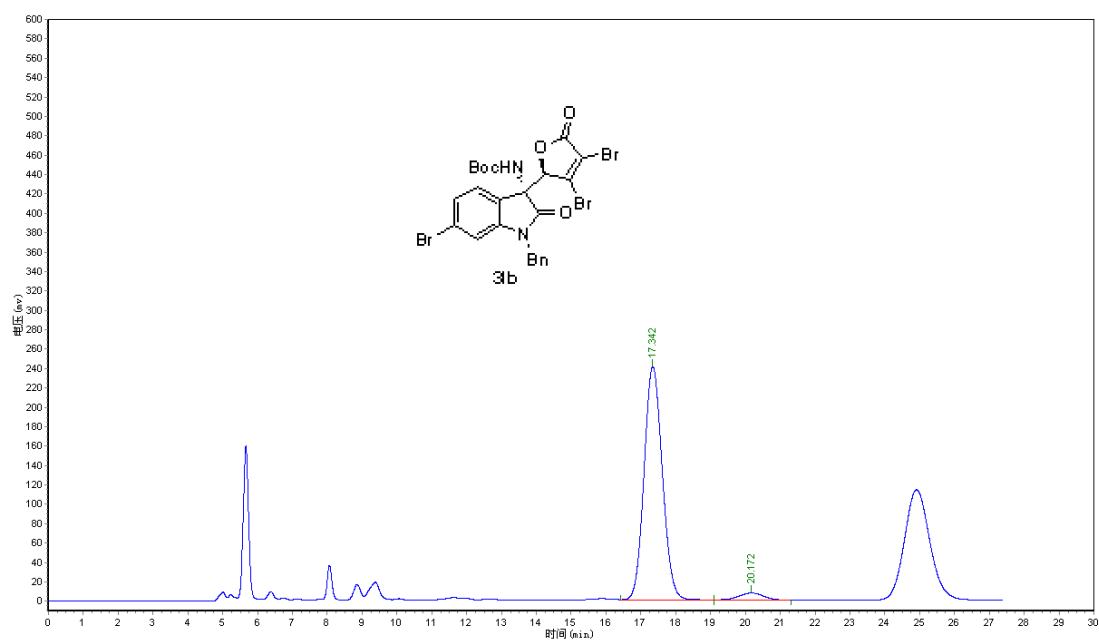

| Peak | RT(min.) | Height(mV*sec) | Area(mV)    | Area(%) |
|------|----------|----------------|-------------|---------|
| 1    | 17.342   | 240486.109     | 8729720.000 | 96.2862 |
| 2    | 20.172   | 7049.230       | 336708.281  | 3.7138  |

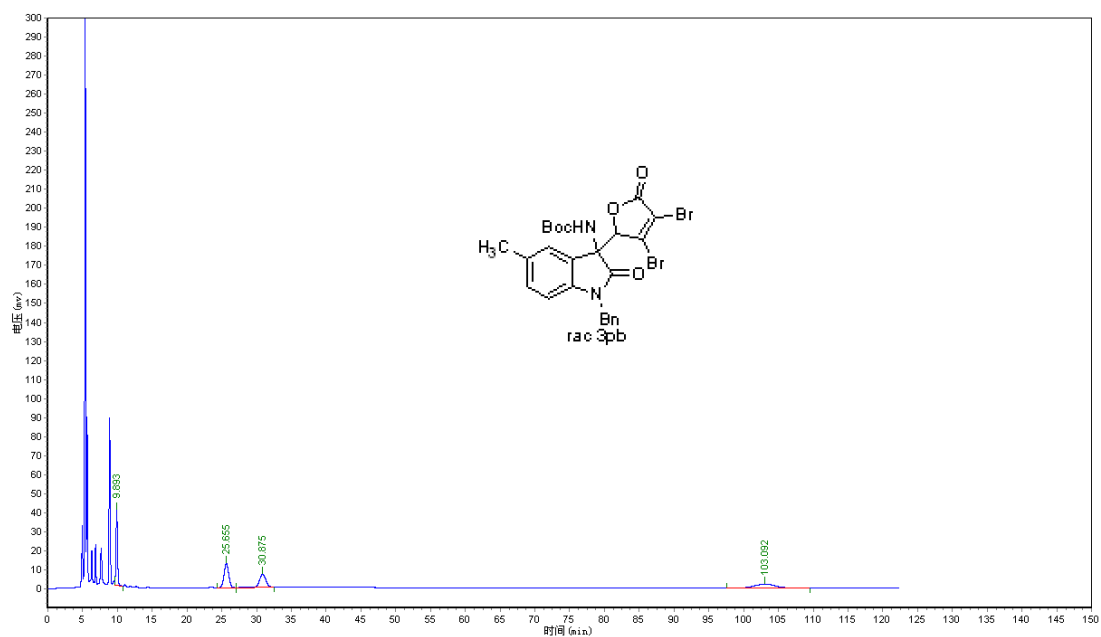

| Peak | RT(min.) | Height(mV*sec) | Area(mV)   | Area(%) |
|------|----------|----------------|------------|---------|
| 1    | 9.893    | 39545.578      | 627360.375 | 29.6823 |
| 2    | 25.655   | 12707.087      | 598752.563 | 28.3288 |
| 3    | 30.875   | 6977.250       | 441629.469 | 20.8948 |
| 4    | 103.092  | 2086.019       | 445841.500 | 21.0941 |

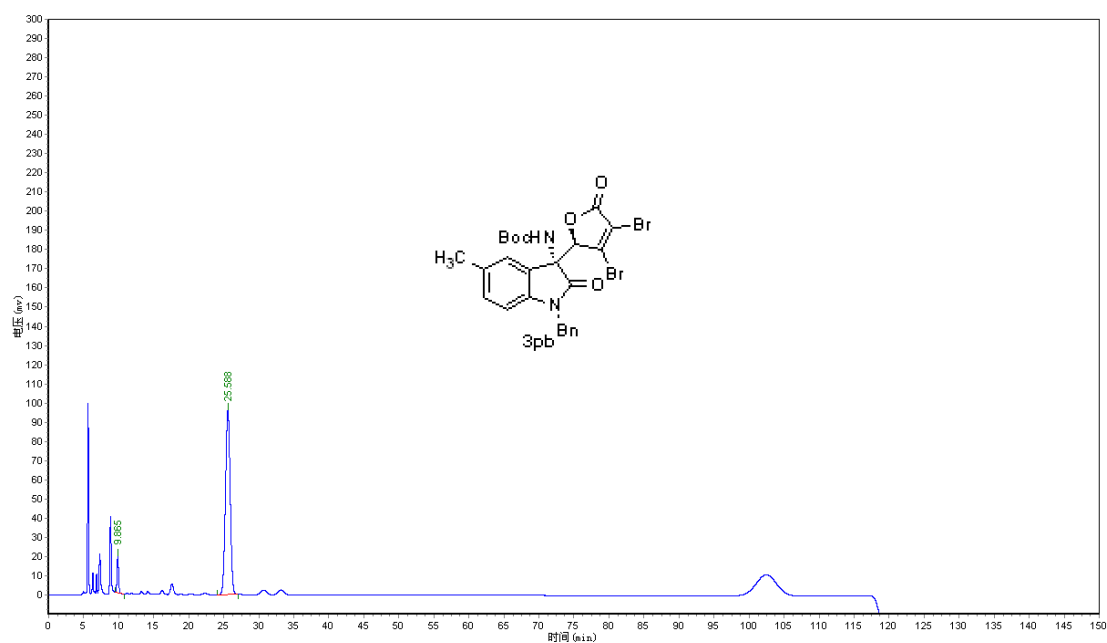

| Peak | RT(min.) | Height(mV*sec) | Area(mV)    | Area(%) |
|------|----------|----------------|-------------|---------|
| 1    | 9.865    | 19012.695      | 295170.750  | 6.1180  |
| 2    | 25.588   | 96067.805      | 4529464.500 | 93.8820 |

## References

- 1 W.-J. Wen, D. Wang, J.-C. Feng, P. Li, D.-P. Zhao and R. Wang, *Org. Lett.*, **2012**, *14*, 2512.
- 2 F. Bellina and R. Rossi, *Practical Synthetic Procedures*, **2001**, 1887.
- 3 (a) B. Vákuyla, S. Varga, A. Cs ámpai and T. So ós, *Org. Lett.*, **2005**, *7*, 1967; (b) W. Yang and D.-M. Du, *Org. Lett.*, **2012**, *12*, 5450; (c) H.-M. Li, Y. Wang, L. Tang, F.-H. Wu, X.-F. Liu, C.-Y. Guo, B. M. Foxman and L. Deng, *Angew. Chem. Int. Ed.*, **2004**, *44*, 105.
